# Supplementary material for: Gliotransmission of D-serine promotes thirst-directed behaviors in Drosophila
Source: Curr Biol. 2022 Sep 26;32(18):3952–3970.e8. doi: 10.1016/j.cub.2022.07.038 (PMC9616736; doi:10.1016/j.cub.2022.07.038)
Supplement: Document S2. Article plus supplemental information [file mmc5.pdf]

# Current Biology

## Gliotransmission of D-serine promotes thirst-directed behaviors in *Drosophila*

### Graphical abstract

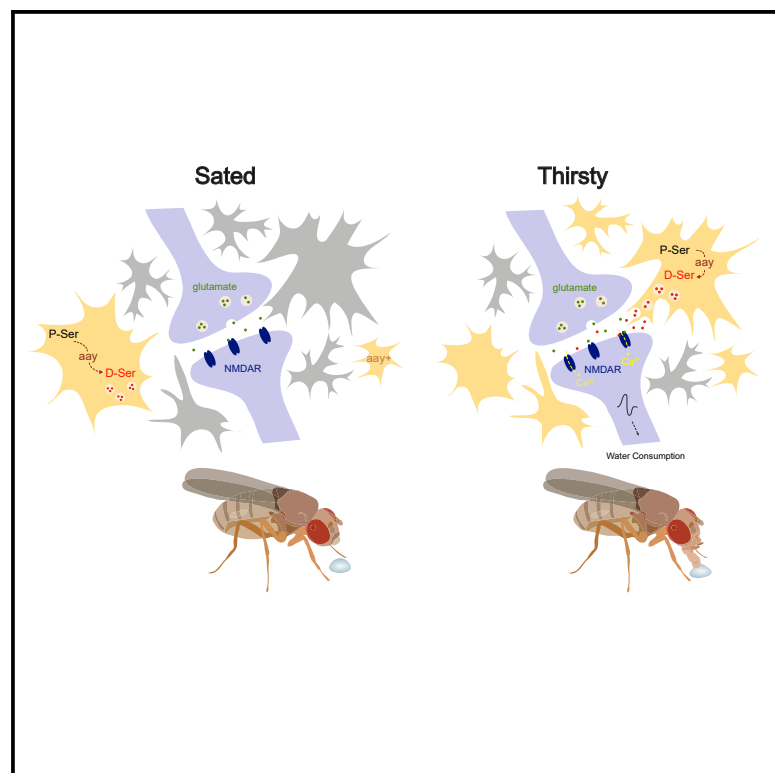

### Authors

Annie Park, Vincent Croset, Nils Otto, ..., Eleonora Meschi, David Sims, Scott Waddell

### Correspondence

vincent.croset@durham.ac.uk (V.C.), scott.waddell@cncb.ox.ac.uk (S.W.)

### In brief

Park et al. show that water deprivation primarily alters the glial transcriptome in *Drosophila*. Screening the regulated genes identified astrocytic expression of the *astray*-encoded phosphoserine phosphatase and astrocyte-released D-serine to be key elements of the brain's response toward facilitating thirst-directed behaviors.

### Highlights

- Water deprivation alters the levels of many glial-expressed genes in *Drosophila*
- Levels of *astray*-encoded phosphoserine phosphatase bi-directionally alter drinking
- Astrocytic D-serine regulates water procurement via NMDA-type glutamate receptors
- Astrocytes frequently contribute processes to tripartite glutamatergic synapses

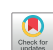

Article

# Gliotransmission of D-serine promotes thirst-directed behaviors in *Drosophila*

Annie Park,<sup>1,4</sup> Vincent Croset,<sup>1,2,4,\*</sup> Nils Otto,<sup>1</sup> Devika Agarwal,<sup>1,3</sup> Christoph D. Treiber,<sup>1</sup> Eleonora Meschi,<sup>1</sup> David Sims,<sup>3</sup> and Scott Waddell<sup>1,5,6,\*</sup>

<sup>1</sup>Centre for Neural Circuits & Behaviour, University of Oxford, Oxford OX1 3TA, UK

<sup>2</sup>Department of Biosciences, Durham University, Durham DH1 3LE, UK

<sup>3</sup>MRC Computational Genomics Analysis and Training Programme (CGAT), MRC Centre for Computational Biology, MRC Weatherall Institute of Molecular Medicine, John Radcliffe Hospital, Headington, Oxford OX3 9DS, UK

<sup>4</sup>These authors contributed equally

<sup>5</sup>Twitter: @scottishwaddell

<sup>6</sup>Lead contact

\*Correspondence: [vincent.croset@durham.ac.uk](mailto:vincent.croset@durham.ac.uk) (V.C.), [scott.waddell@cncb.ox.ac.uk](mailto:scott.waddell@cncb.ox.ac.uk) (S.W.)

<https://doi.org/10.1016/j.cub.2022.07.038>

## SUMMARY

Thirst emerges from a range of cellular changes that ultimately motivate an animal to consume water. Although thirst-responsive neuronal signals have been reported, the full complement of brain responses is unclear. Here, we identify molecular and cellular adaptations in the brain using single-cell sequencing of water-deprived *Drosophila*. Water deficiency primarily altered the glial transcriptome. Screening the regulated genes revealed astrocytic expression of the *astray*-encoded phosphoserine phosphatase to bi-directionally regulate water consumption. *Astray* synthesizes the gliotransmitter D-serine, and vesicular release from astrocytes is required for drinking. Moreover, dietary D-serine rescues *aay*-dependent drinking deficits while facilitating water consumption and expression of water-seeking memory. D-serine action requires binding to neuronal NMDA-type glutamate receptors. Fly astrocytes contribute processes to tripartite synapses, and the proportion of astrocytes that are themselves activated by glutamate increases with water deprivation. We propose that thirst elevates astrocytic D-serine release, which awakens quiescent glutamatergic circuits to enhance water procurement.

## INTRODUCTION

The sensation of thirst is predominantly a manifestation of our body's response to being water deprived. Water deficit reduces the volume and increases the osmolality of an animal's blood. These changes induce multiple adaptations throughout the body, such as elevated activity of osmosensory neurons in the brain, alteration of blood pressure and heart rate, and increased retention of water.

Osmosensory neurons in the subfornical organ (SFO) and organum vasculosum (OV) of the lamina terminalis (LT) of the mammalian forebrain respond directly and indirectly to changes in plasma osmolality and blood volume/pressure, via hormones such as Angiotensin II.<sup>1–3</sup> These neurons then directly or indirectly release compensatory neuropeptide/hormone signals like Vasopressin/anti-diuretic hormone which promotes bodily responses to reduce water loss and restore blood pressure, and behavioral responses to restore fluid balance.<sup>4–7</sup> Artificial engagement of LT neurons can induce water consummatory behaviors.<sup>8–17</sup> However, the full range of nervous system mechanisms that accompany the water-deprived state, and how they modulate behavioral regimes and actions to satisfy thirst, is currently unknown.

In *Drosophila*, ion transport peptide (ITP) is the likely anti-diuretic functional analog of the mammalian vasopressin and

renin-angiotensin systems.<sup>18</sup> ITP is produced by neurosecretory neurons in the brain and abdominal ganglion; its expression increases with water deprivation. ITP increases water consumption, reduces water excretion in the malpighian tubules, and increases hindgut reabsorption. ITP induction also represses feeding. Although circuits regulated by ITP remain to be identified, other thirst-regulated circuits required for water seeking and consumption/homeostasis have been reported. Interoceptive sensory neurons (ISNs) in the subesophageal zone (SEZ) directly sense high osmolality (via the cation channel Nanchung) and their inhibition promotes drinking.<sup>19</sup> Interestingly, ISN activation (via adipokinetic hormone [AKH]) suppresses drinking and instead promotes feeding. Two other classes of SEZ neurons, the Janu neurons, regulate water seeking behavior up a humidity gradient, but not total water consumption.<sup>20</sup> The Janu neurons are either GABAergic or Allatostatin (Asta)-releasing. Their joint activation is rewarding, and the AstA group simultaneously inhibits feeding while promoting water seeking. Finally, different types of mushroom body innervating dopaminergic (DA) neurons have been implicated in water seeking, water reward learning,<sup>21</sup> and thirst-dependent control of the expression of water-seeking memories.<sup>22</sup> Some of these DA neurons are regulated by the leucokinin neuropeptide which is released from neurons that are activated by elevated osmolality.<sup>22</sup> More complex interaction between neuromodulators

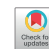

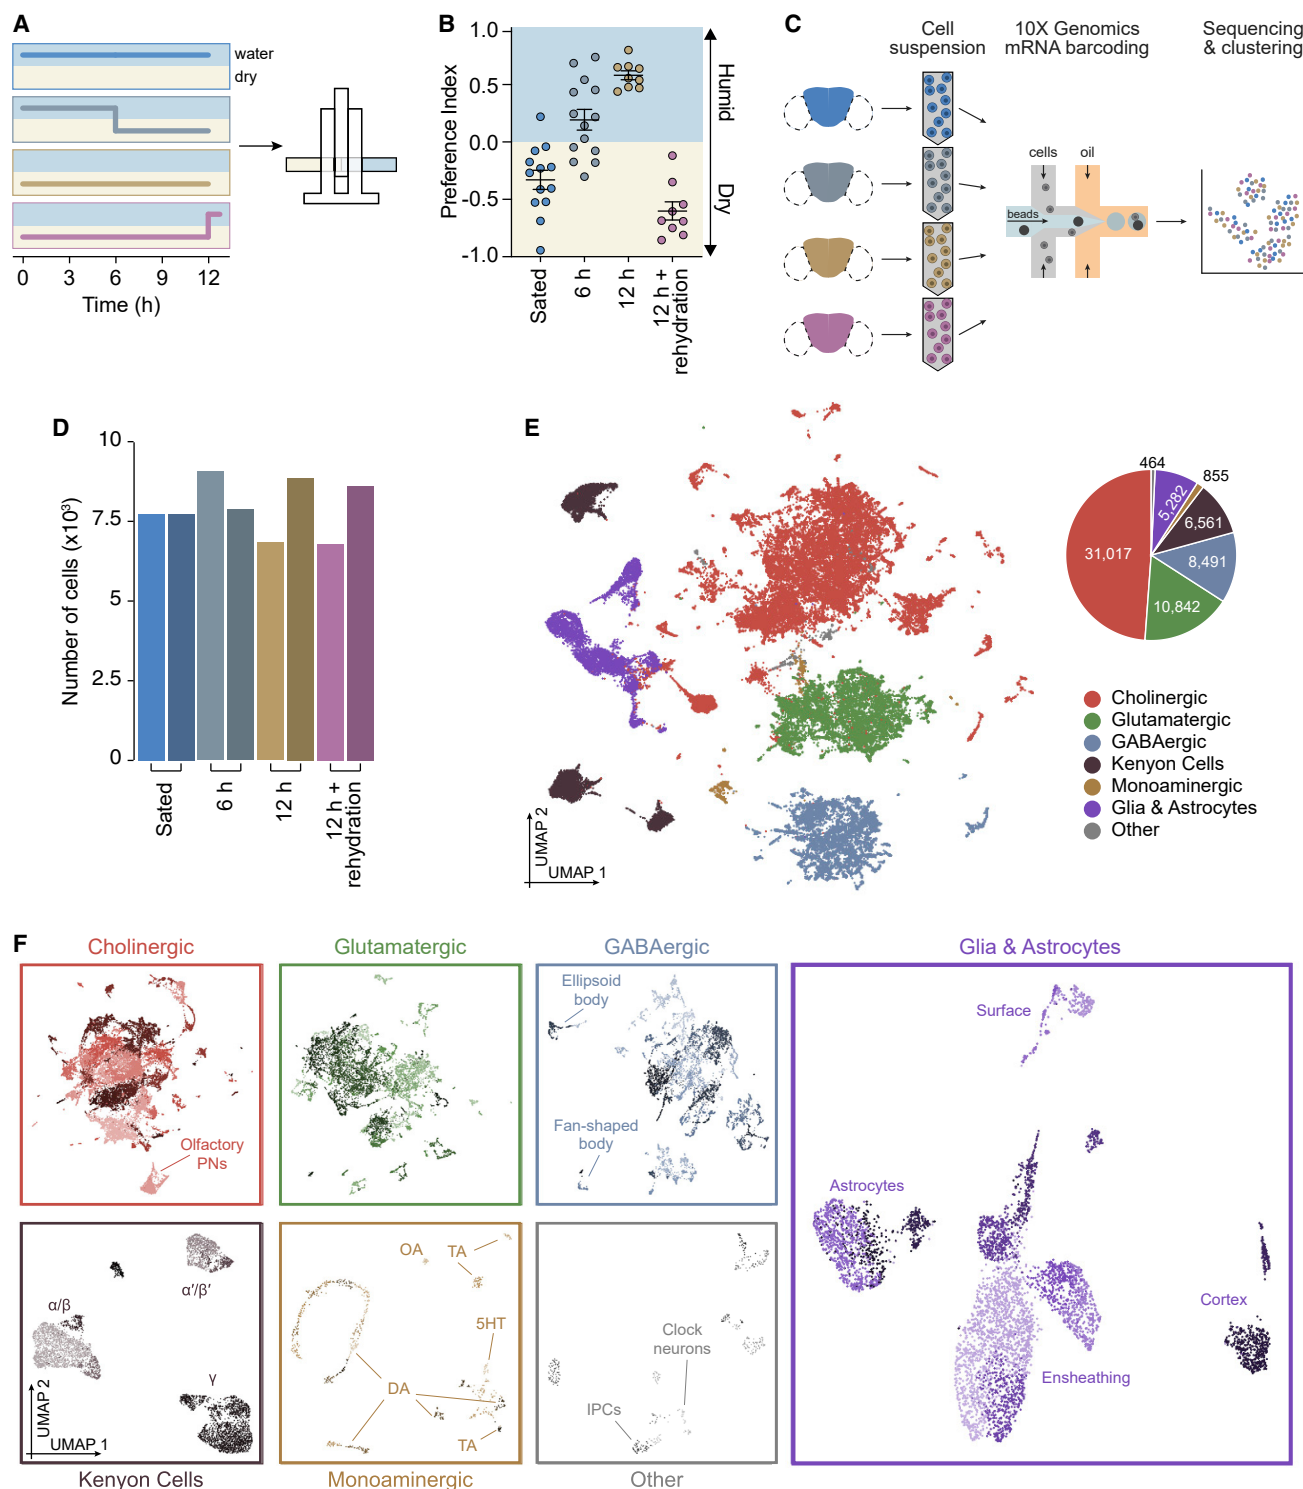

**Figure 1. Single-cell transcriptomics of thirsty *Drosophila***

(A) Schematic protocols for humidity preference assay. Flies were kept in vials with or without water for the indicated times, then given a T-maze choice between a humid and a dry chamber.

(B) Increasing dehydration converts humidity avoidance behavior into attraction. Attraction returns to avoidance with thirst quenching.

(C) Schematic of the process of single-cell transcriptomics analyses comparing flies from the four conditions in (B). Two independent samples were processed for each condition.

(D) Total number of cells obtained from each sample, after filtration of low-quality barcodes and doublets.

(legend continued on next page)

allows DA neurons to selectively promote state appropriate expression of thirst- or hunger-dependent memories.

Brain responses to water deprivation need not be exclusively neuronal. A blood-brain barrier (BBB) shields most neurons from the circulatory environment. Notably, the osmosensory neurons of the mammalian SFO and OV have processes outside the BBB where they can directly sample circulatory status.<sup>23</sup> The mammalian BBB is formed by microvascular endothelial cells, pericytes, and astrocytes. Since astrocytes also innervate the neuropil, where their processes contribute to tripartite synapses (TPSs), they are well positioned to sense and/or transmit metabolites and signals representing nutrient status to neurons.<sup>24–30</sup> In *Drosophila*, perineurial and subperineurial glia form the BBB, whereas astrocytes tile the entire brain and permeate the neuropil.<sup>26,31</sup> Astrocytes in the fly therefore also have potential to influence neuronal activity in response to nutritional state.<sup>32</sup> However, evidence for such a role of fly astrocytes is currently lacking.

The *Drosophila* brain provides an unparalleled opportunity to investigate neural mechanisms of thirst with cellular and molecular resolution. Recent advances in single-cell transcriptomics have generated transcriptional profiles from most of the abundant cell types in the fly brain.<sup>33–37</sup> Here, we used single-cell transcriptomics to identify brain-wide and cell-type restricted changes in gene expression triggered by water deprivation. Most changes occurred within glia, rather than neurons. Functional analyses of thirst responsive genes identified astrocyte expression of the *astray* (*aay*)-encoded phosphoserine phosphatase and gliotransmission of its product D-serine to be required for regulated water consumption. We show that astrocytes contribute processes to tripartite glutamatergic synapses in the fly brain and that D-serine promotes water procurement via fly NMDA-type glutamate receptors. These findings provide a new molecular and cellular framework to understand how thirst alters brain physiology and behavior.

## RESULTS

### Single-cell transcriptomics in thirsty *Drosophila*

*Drosophila* prefer dry environments when water sated but seek humidity when water deprived, behaviors that serve fluid homeostasis.<sup>21,38,39</sup> This behavioral switch is readily quantified by giving flies the choice in a T-maze between humid and dry chambers (Figure 1A). Although water-sated flies preferred the dry, those dehydrated for 6 or 12 h showed an increasing preference for humidity (Figure 1B). Flies water deprived for 12 h then permitted to drink reverted to preference for the dry chamber, demonstrating water attraction is rapidly reversed upon drinking (Figures 1A and 1B).

To investigate cellular correlates of thirst, we used the 10X Genomics Chromium system to generate single-cell transcriptomic atlases of brains extracted from water-sated, 6 and 12 h

dehydrated, and rehydrated flies (Figure 1C). After filtering out low-quality barcodes and putative cell doublets (Figure S1A), we retrieved a total of 63,512 cells. Importantly, each dehydration condition and experimental sample contributed a similar cell number to the total collection (Figure 1D). We used SCTransform and the canonical correlation anchor-based method in Seurat v3<sup>40,41</sup> to normalize and integrate data from each sample to help identify shared cell populations. An initial unsupervised clustering step was performed to partition cells into seven main classes, which we annotated based on the expression of known marker genes (Figure S1B). These classes include cholinergic, glutamatergic, GABAergic, mushroom body intrinsic Kenyon cells, monoaminergic neurons, glia, and “other” cells not in these previous categories (Figure 1E).<sup>33,40</sup> Cells in each class were next independently subdivided into 184 clusters, each containing between 14 and 5,083 cells (Figure 1F). Monoaminergic clusters were smaller than others (median cells/cluster: 32), reflecting their discrete transmitters (DA, octopaminergic [OA], tyraminergetic [TA], serotonergic [5HT]), functional specialization among neurons of each type, and relative scarcity in the brain. Conversely, Kenyon cell and other cholinergic neuron clusters were largest (median cells/cluster: 354.5 and 293.5, respectively; Figure S1C). Again, for each of these 184 clusters, we identified specific marker genes (Data S1; Figure S1F), with which we annotated known cell types (Figure 1F; see STAR Methods for detail). We noted that each experimental sample was evenly represented across cell clusters (Figures S1D and S1E), indicating that dehydration does not change the cellular composition of the adult fly brain, in contrast to in developing larvae where starvation reduced the number of undifferentiated *headcase* expressing neurons.<sup>41</sup>

### The transcriptional signature of thirst in the fly brain

A characteristic of single-cell RNA sequencing (scRNA-seq) data is that expression of certain genes is stochastically undetectable in a fraction of the cells in which they are normally expressed. This artefact called “dropout” can result from low mRNA levels in single cells and inefficient mRNA capture during library preparation, and it produces a larger than expected number of zero read counts.<sup>42,43</sup> Therefore, classic differential expression methods designed for negative binomial bulk transcriptome data often underperform when analyzing weakly expressed genes in scRNA-seq data.<sup>44,45</sup> To correct for potential bias caused by zero read count inflation, we downweighed excess zeros using ZINB-WaVE,<sup>46,47</sup> which enables a more accurate estimation of data dispersion and thereby improves detection of differentially expressed genes. Using ZINB-WaVE with both edgeR and DESeq2, two tools for quantifying differential expression,<sup>48,49</sup> we calculated gene expression differences between water sated and 12 h dehydrated conditions across cell clusters (Figure 2A).

We expected that general osmotic stress of dehydration might trigger a brain-wide transcriptional response. We identified four

(E) Left: UMAP plot from first clustering step, and identification of seven main cell classes. Right: pie chart showing the number of cells obtained from each of these classes.

(F) UMAP plots showing sub-clustering of each of the seven cell classes shown in (E). Known cell types within each class are labeled. Kenyon cell labels represent known subtypes that innervate corresponding mushroom body lobes. Within the monoaminergic cells labels are OA, octopaminergic; TA, tyraminergetic; 5HT, serotonergic; DA, dopaminergic. Within other, IPCs, insulin-producing cells. See also Figure S1.

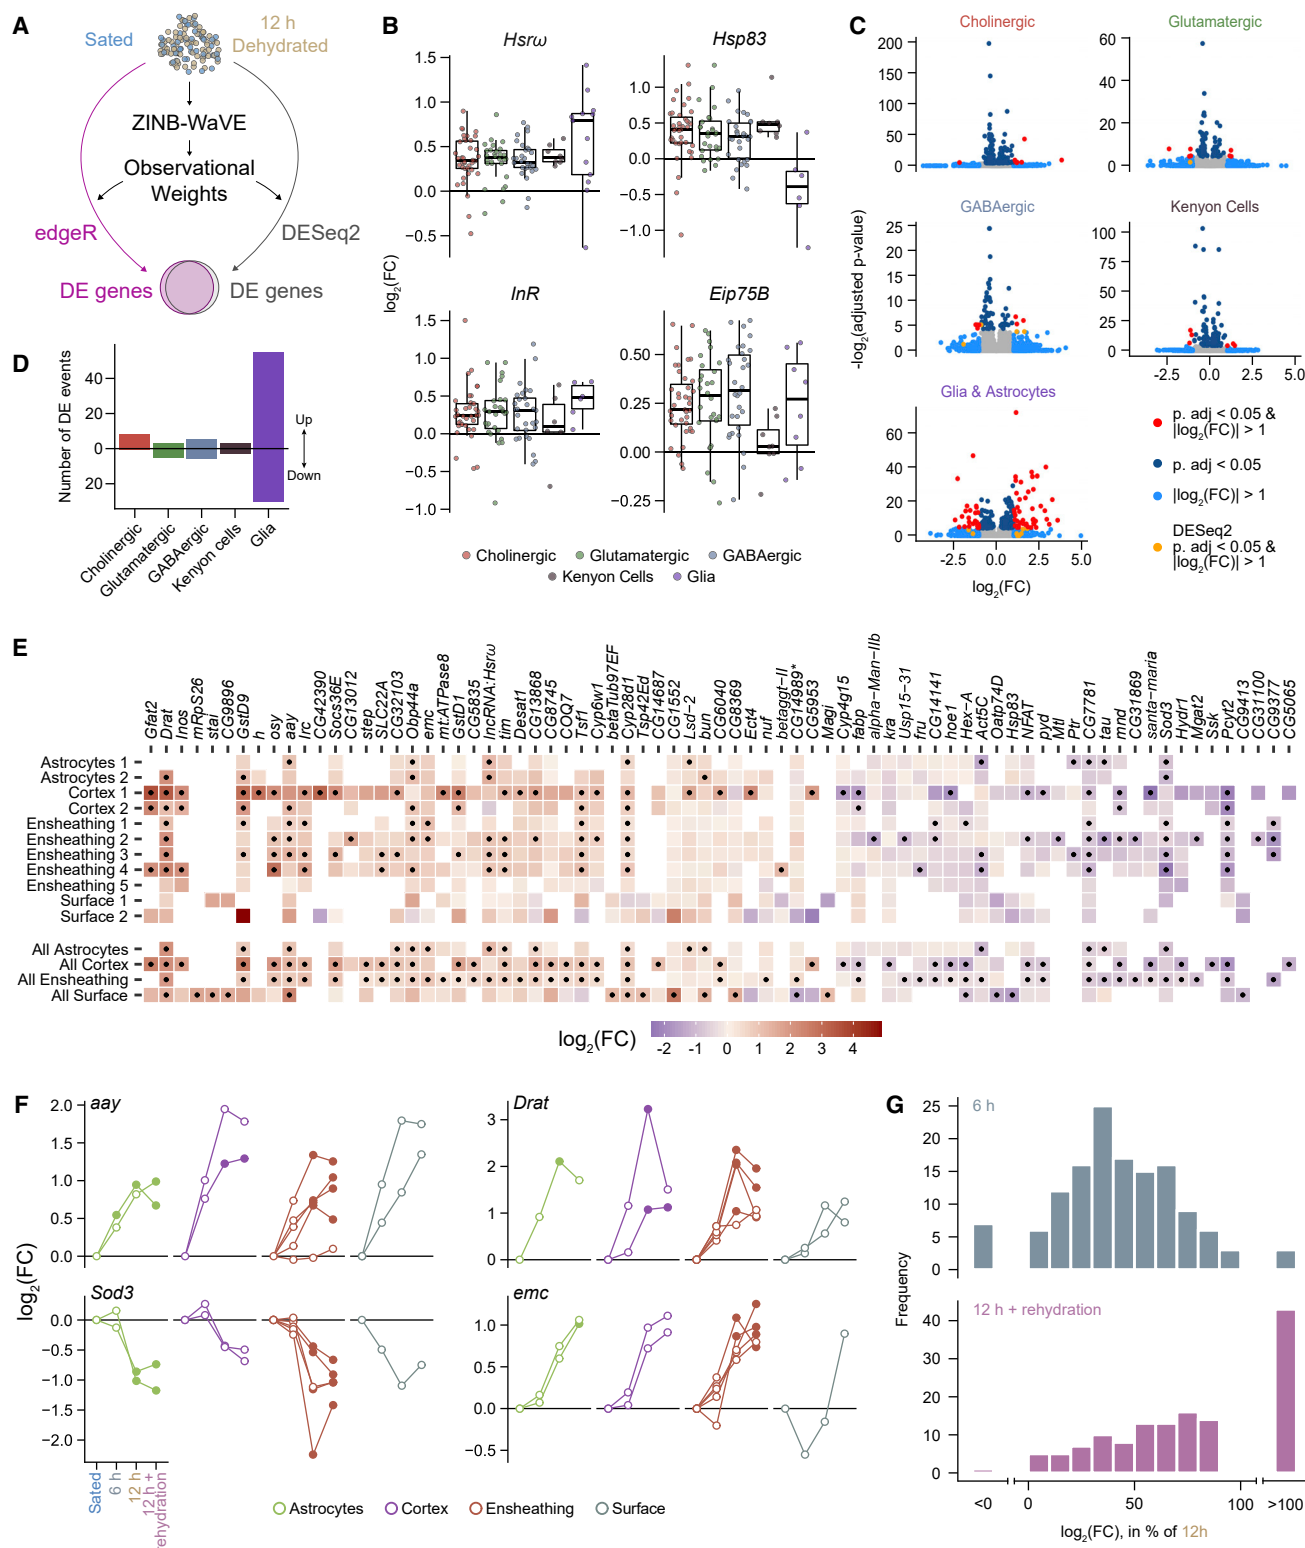

**Figure 2. The transcriptional signature of thirst in the fly brain**

(A) Schematic of differential expression analysis. Observational weights calculated with ZINB-WaVE were used in edgeR and DESeq2 to correct for zero-inflation. (B) Boxplots showing differential expression of the four genes most broadly regulated in each cluster after 12 h dehydration, grouped by main cell class.

(legend continued on next page)

genes whose expression increased across most clusters, with an average  $\log_2(\text{FC})$  across clusters above 0.25 (Figure 2B). Two of these, the chaperone encoding *Hsp83* and the long non-coding RNA *Hsrw*, have been implicated in the cellular stress response and shown together to regulate transcription.<sup>50–52</sup> Global upregulation of the insulin receptor (*InR*) may reflect the role of insulin signaling in balancing thirst and hunger,<sup>19,53</sup> whereas the ecdysone-response gene *Eip75B* buffers circadian rhythms in stressful conditions.<sup>54</sup>

Cell-types exhibiting state-dependent changes in gene expression potentially play a role in the fly's response to thirst, and the regulated genes may represent intra or intercellular mechanisms mediating physiological and behavioral responses. 84 genes showed strong differential expression ( $|\log_2(\text{FC})| > 1$ , adjusted p value < 0.05) in at least one cell cluster, with either edgeR or DESeq2, which identified slightly different sets of genes (Figure S2A). Although we detected fewer genes in glia than in other cell clusters (Figure S2D), most differential expression events (85/119) occurred in glia, with the rest in cholinergic, glutamatergic, GABAergic, and Kenyon cell classes (Figures 2C and 2D). No individual cluster within monoaminergic and “other” classes contained enough cells to enable differential analysis with sufficient statistical power. No differences were apparent when clusters from these two classes were analyzed as a group. Within the glial clusters, 6 genes passed our differential expression criteria in astrocytes, 26 in ensheathing glia, and 33 in cortex glia. No differences were found in surface glia. However, pooling glial clusters by type provided enough statistical power to reveal 15 genes in surface glia and 2 additional genes in cortex glia (Figure 2E). With the exception of *CG14989*, which was upregulated in ensheathing glia and downregulated in surface glia, all other differentially expressed genes changed in a similar direction in multiple glial types. Gene Ontology analysis indicated that differentially expressed genes contribute to pathways related to metabolism, response to stress, or behavior (Figure S2E). In summary, the highest magnitude thirst-dependent changes in gene expression occur in glial cell-types, whereas neuronal transcriptomes remain comparatively stable.

We next tested whether expression of thirst-responsive genes changed with dehydration time. For several, including *aay*, *Death resistor Adh domain containing target* (*Drat*) and *extra macrochaetae* (*emc*), expression steadily increased as dehydration progressed (Figure 2F), tracking the gradual increase in

behavioral preference for humidity (Figure 1B). Indeed, a majority of  $\log_2(\text{FC})$  values for 6 h were between 30% and 70% of those at 12 h (Figure 2G). In contrast, *superoxide dismutase 3* (*Sod3*) expression remained stable until 6 h but decreased by 12 h (Figure 2F, bottom left) consistent with its suppression, perhaps participating in the metabolic or stress response to severe dehydration. Quenching thirst tended to return some transcript levels toward their sated baseline, although with different magnitude for different genes and clusters. However, transcript levels of many genes continued to increase after rehydration (Figure 2F, bottom right, Figure 2G), suggesting prolonged action beyond the rehydration period. Together, these results illustrate a diversity of water deprivation-induced gene regulation patterns.

### Astrocytic *aay* bi-directionally regulates water consumption

We tested whether glial genes identified by scRNA-seq regulated water consumption in the capillary feeding (CAFE) assay<sup>55</sup> (Figures 3A and 3B). We targeted temporally restricted RNAi expression to adult glia using Repo-GAL4 combined with a ubiquitously expressed temperature-sensitive GAL80<sup>56</sup> (Figure 3C). The strongest change in water consumption occurred with *aay*. Adult-restricted RNAi knockdown of *aay* reduced water consumption, whereas overexpression increased it (Figures 3B, 3C, S3D, and S3E). Notably, *aay* RNAi appears to specifically regulate water consumption, as feeding was unaffected (Figure S3F).

We noticed significant death in the CAFE assay when manipulating *aay* (Figures S3G, S4D, and S4E), perhaps from sensitivity to stress of dehydration, or idiosyncrasies of the assay.<sup>57</sup> To circumvent this issue, we employed a manual water consumption assay that is less challenging for the animals.<sup>19</sup> These experiments revealed similar results to CAFE when knocking down or overexpressing *aay* in glia (Figures 3D–3F). We next tested whether *aay*-induced changes in water consumption could be assigned to a glial cell type.<sup>58</sup> Expressing *aay* RNAi in astrocytes, but not in perineurial glia, reduced water consumption indicating the specific importance of astrocytic *aay* in controlling drinking (Figures 3G and 3H). Although baseline drinking of control flies varied between experiments, relative differences between genotypes and treatments remained consistent.

The *aay* gene encodes a phosphoserine phosphatase which converts phosphoserine into D- and L-serine.<sup>59–61</sup> In mammals,

(C) Volcano plots representing statistical significance against fold change for all genes tested in cholinergic neurons, glutamatergic neurons, GABAergic neurons, Kenyon cells, and glia, calculated with edgeR. Each plot represents pooled data from all clusters in each cell class. Genes with adjusted p value < 0.05 and  $|\log_2(\text{FC})| > 1$  in DESeq2 but not edgeR are labeled orange.

(D) Number of differential expression events identified in the five cell classes shown in (C). Values above the bar represent genes upregulated in thirsty flies and below the bar represents downregulated genes.

(E) Heatmap showing fold change for each of the most regulated genes in glia, for each cluster (top) and for clusters grouped by glia type (bottom), calculated with edgeR. Black dots: adjusted p value < 0.05. Empty tiles: transcript levels below detection threshold. \*: *CG14989* is the only gene significantly upregulated and downregulated in different clusters.

(F) Changes in expression for four differentially expressed genes across glia clusters, and through all four hydration conditions. In most cases, expression gradually increases or decreases during dehydration. After rehydration, mRNA levels tended to remain similar to levels measured in dehydrated flies. Full circles indicate adjusted p value < 0.05, and empty circles indicate adjusted p value  $\geq 0.05$ .

(G) Comparisons of  $\log_2(\text{FC})$  values (versus sated controls) after 6 h dehydration (top) or after rehydration (bottom), as a percentage of  $\log_2(\text{FC})$  values after 12 h dehydration. Percentages were calculated for each of the significant gene-cluster pairs shown in (E) (black dots) and represented in histograms in 10% increments. Changes in expression are lower (<100%) after 6 h than after 12 h dehydration (top) for most genes. However, expression of many genes remains high (>100%) after thirsty flies are allowed to drink (bottom).

See also Figure S2.

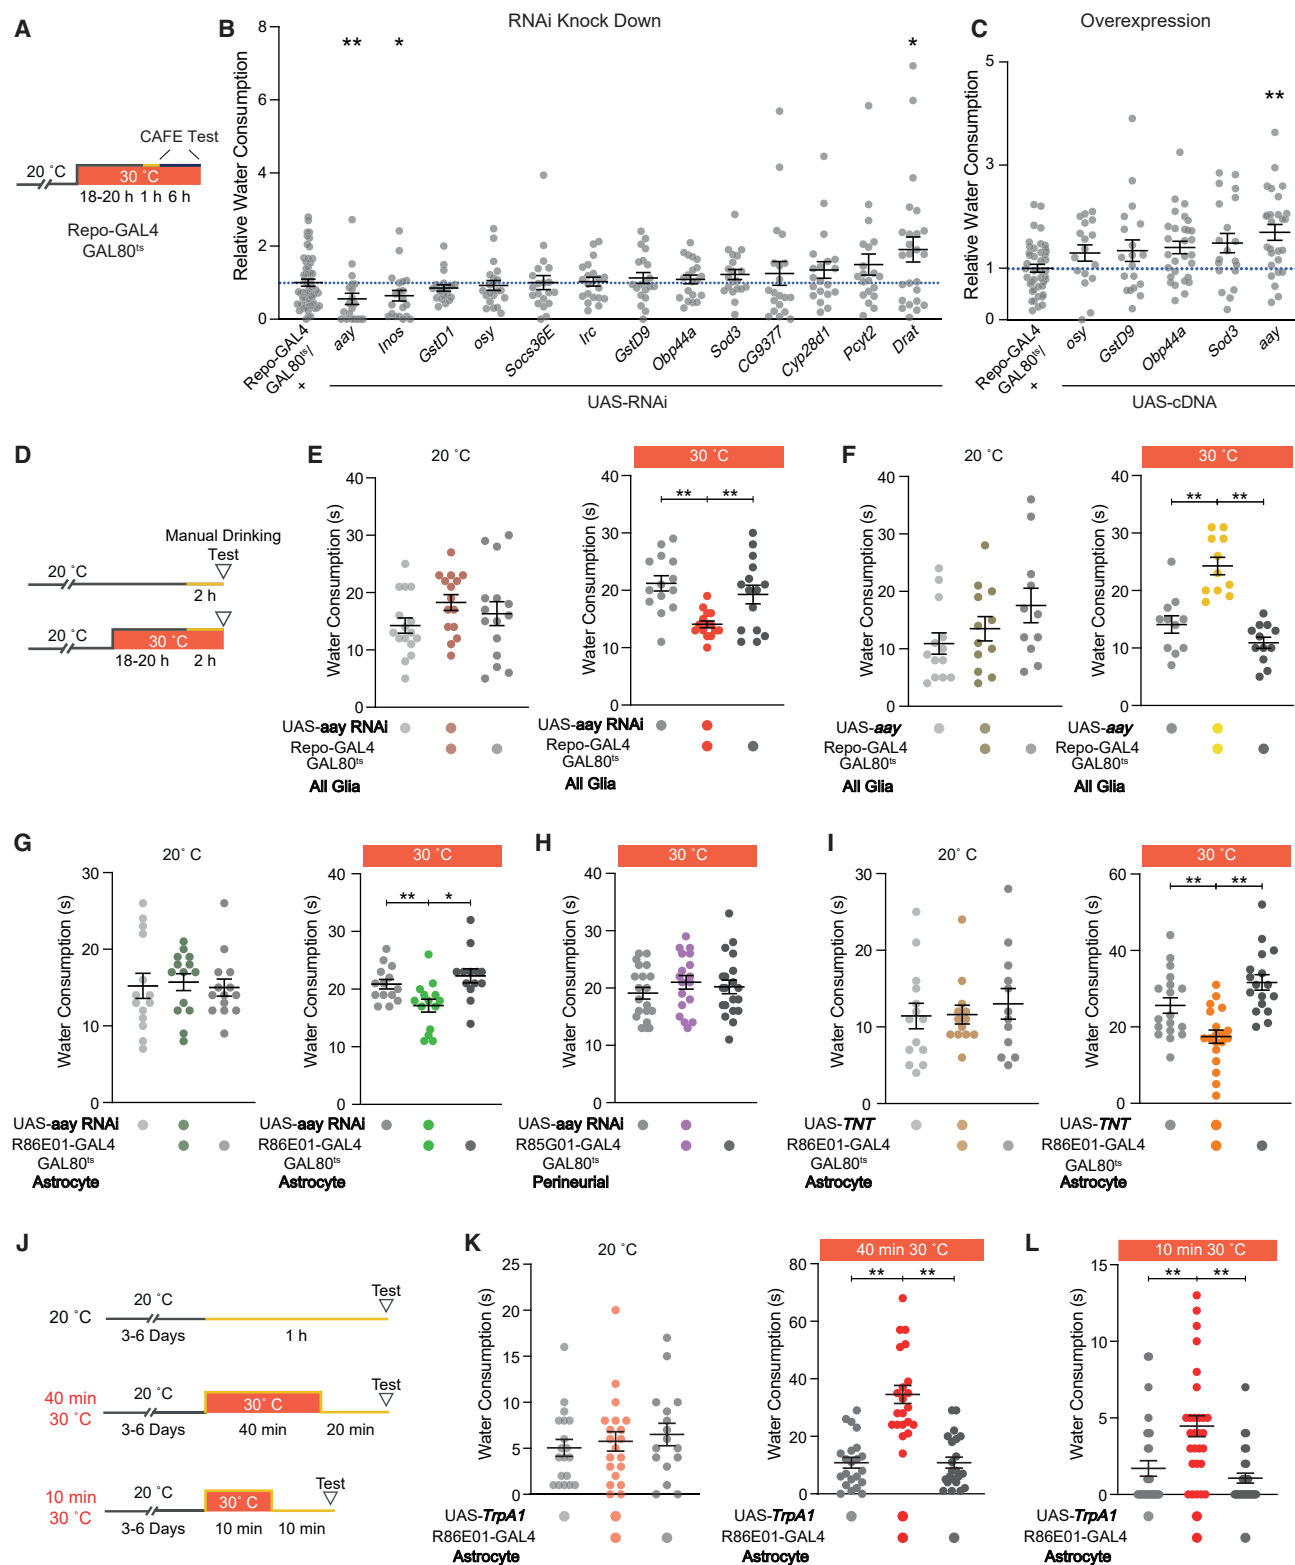

**Figure 3. Astrocytic *aay* is a novel regulator of water consumption**

(A) Schematic for temperature control of GAL80<sup>ts</sup>/GAL4 driven expression of UAS-RNAi or UAS-cDNA transgenes with CAFE test. Orange section of line indicates period of water restriction.

(B) Water consumption in the CAFE assay of flies with RNAi knock down of candidate genes. Dotted blue line indicates normalization to control Repo-GAL4 flies, equal to 1. \*p < 0.05, \*\*p < 0.01 two-tailed Mann-Whitney test  $n_{\text{RNAi}} = 20-25$ ,  $n_{\text{Repo-GAL4}} = 50$ .

(legend continued on next page)

the gliotransmitter D-serine is packaged into astrocytic vesicles and released in a SNARE and calcium-dependent manner.<sup>62–66</sup>

*Drosophila* astrocytes express vesicular machinery including synaptobrevin (*Syb*) and Syntaxin 1A (*Syx1A*) (Figures S3M and S3N). We tested whether vesicular release from astrocytes is necessary for water consumption by expressing a tetanus-toxin (*TetX*) transgene using an astrocyte-specific *GAL4*. *TetX* abolishes evoked release by cleaving the vesicle-associated membrane protein synaptobrevin. Temporally restricted *TetX* expression in astrocytes reduced water consumption (Figure 3I).<sup>58</sup>

We also tested whether evoking  $Ca^{2+}$  entry into astrocytes promoted water consumption by expressing a transgene encoding the  $Ca^{2+}$ -permeable temperature-sensitive *TrpA1* channel in astrocytes (*R86E01>TrpA1*). We first tested flies with a 2 h “fictive dehydration” step at the *TrpA1* activation temperature of 30°C; however, this manipulation reversibly paralyzed *R86E01>TrpA1* flies, as previously described.<sup>67</sup> We therefore shortened the 30°C stimulation to 40 min and allowed flies to recover at 20°C for 20 min (Figure 3J). This procedure substantially increased water consumption compared to controls carrying the *R86E01-GAL4* or *UAS-TrpA1* transgenes or those left at 20°C for the whole procedure (Figure 3K). Since vesicular release occurs promptly following astrocytic activation,<sup>62</sup> we also further restricted the heat incubation to 10 min. This brief astrocyte activation was sufficient to increase water consumption (Figures 3L and S3L). Together, these data indicate that *aay* expression and vesicular release from activated astrocytes regulate water consumption.

### D-serine facilitates water consumption via NMDA receptors

To further assess the role of D-serine as a gliotransmitter in water consumption, we supplemented the flies’ diet with D-serine and measured water intake (Figures 4A, 4B, and S4A). Feeding flies with D- but not L-serine increased water consumption (Figure 4C). D-serine is an enantiomer-specific co-agonist for NMDA-type glutamate receptors (NMDARs).<sup>68,69</sup> We therefore tested if *aay*-dependent drinking defects could be rescued with dietary D-serine. Glial expression of *aay* RNAi was induced in flies previously fed with medium supplemented with D-serine (Figure 4B). D-serine feeding was sufficient to restore the *aay*-induced drinking deficit to a normal level (Figure 4D). Control experiments showed that flies did not prefer D-serine containing food and that D-serine did not alter feeding (Figures S4B and S4C).

D-serine is degraded by D-amino acid oxidase (DAAO), which is encoded by the *CG12338* and *CG11236* genes in *Drosophila*.<sup>70,71</sup> Since *CG11236* expression is barely detectable in the brain, we focused on *CG12338*.<sup>70</sup> Overexpressing a *CG12338* DAAO transgene in glia suppressed water consumption (Figure 4E). Together, the *aay* manipulation, dietary supplementation, and DAAO data suggest that D-serine can bi-directionally regulate water consumption.

NMDARs are voltage and ligand-gated ion channels. Efficient channel activation requires binding of L-glutamate to the NR2 subunit and a co-agonist glycine or D-serine, which occupy the same site on the NR1 subunit.<sup>72</sup> Prior neuronal depolarization is also required to remove a  $Mg^{2+}$  block, allowing ligand-gated channel conductance to occur. We therefore tested whether D-serine facilitated water consumption via NMDAR activation. We used flies harboring single-site mutations (K558Q and F654A) in the *NMDAR1* gene which encodes the fly NR1 subunit. These amino acid substitutions are equivalent to K544Q and F639A in mammalian NR1.<sup>73–75</sup> Glycine affinity is increased in receptors bearing F639A/F654A and decreased in those with K544Q/K558Q, whereas glutamate affinity is unaltered.<sup>76,77</sup> Measuring water consumption revealed that flies harboring the F654A substitution in NR1 drank more than controls (Figure 4F). In addition, K558Q flies exhibited normal water consumption but were unable to acquire the D-serine induced increase in drinking (Figure 4G). Therefore, NMDAR co-agonist affinity directly impacts water consumption.

### D-serine is a co-agonist of the *Drosophila* NMDA receptor

A prior study demonstrated that D- or L-Serine feeding regulated sleep in flies and that the effect depended on NMDARs.<sup>70</sup> However, it is currently assumed that D-serine is a co-agonist of *Drosophila* NMDARs, as in mammals. Since NMDAR activation elicits increases in intracellular  $Ca^{2+}$ , we expressed *GCaMP7f* broadly in NR1 positive (NR1+) neurons and performed *in vivo* calcium imaging in the brain of head fixed flies while bath-applying glycine, D-serine, or L-serine (Figures 5A and 5B). We recorded from NR1+ neurons (*nmdar1-K1GAL4>GCaMP7f*) in the pars intercerebralis (PI) because they are easily accessed and identified and therefore permitted reproducible measurements between flies (Figure 5A).<sup>70</sup> In addition, responses were measured in  $Mg^{2+}$  free (0 mM  $Mg^{2+}$ ) and physiologically relevant concentrations of  $Mg^{2+}$  (4 mM  $Mg^{2+}$ ) (Figure 5B) to assess the importance of removing the  $Mg^{2+}$  occlusion from the channel

(C) Water consumption in CAFE for *UAS* overexpression of targets. \*\* $p < 0.01$  two-tailed Mann-Whitney test  $n_{RNAi} = 17–29$ ,  $n_{Repo-GAL4} = 43$ .

(D) Schematic for temperature control of *GAL80<sup>ts</sup>/GAL4*-driven *UAS*-RNAi or *UAS*-cDNA transgenes with manual water feeding assay. Orange section of line indicates period of water restriction.

(E) RNAi knockdown of *aay* reduces water consumption ( $n = 14–16$ ).

(F) Overexpression of *aay* increases water consumption ( $n = 11–13$ ).

(G) Astrocyte-specific RNAi knockdown of *aay* reduces water consumption ( $n = 13$  and 14).

(H) RNAi knockdown of *aay* in perineurial glia does not alter water consumption ( $n = 18–20$ ).

(I) Preventing vesicular transmission with tetanus-toxin (TNT) expression in astrocytes reduces water consumption ( $n = 12–19$ ).

(J) Temperature regimen for *TrpA1* activation of astrocytes in (K) and (L). Orange section of line indicates period of water restriction.

(K) Astrocyte activation for 40 min increases water consumption ( $n = 16–22$ ). \*\* $p < 0.01$ , Kruskal-Wallis ANOVA with Dunn’s multiple comparisons test.

(L) Astrocyte activation for 10 min increases water consumption ( $n = 28–30$ ). \*\* $p < 0.01$ , Kruskal-Wallis ANOVA with Dunn’s multiple comparisons test. Normality was assessed using Shapiro-Wilk test. \* $p < 0.05$ , \*\* $p < 0.01$ , \*\*\* $p < 0.001$ , \*\*\*\* $p < 0.0001$  Ordinary one-way ANOVA with Dunnett’s multiple comparisons test, unless otherwise stated. Individual data points are single flies. Data are mean  $\pm$  standard error of the mean (SEM). See also Figure S3.

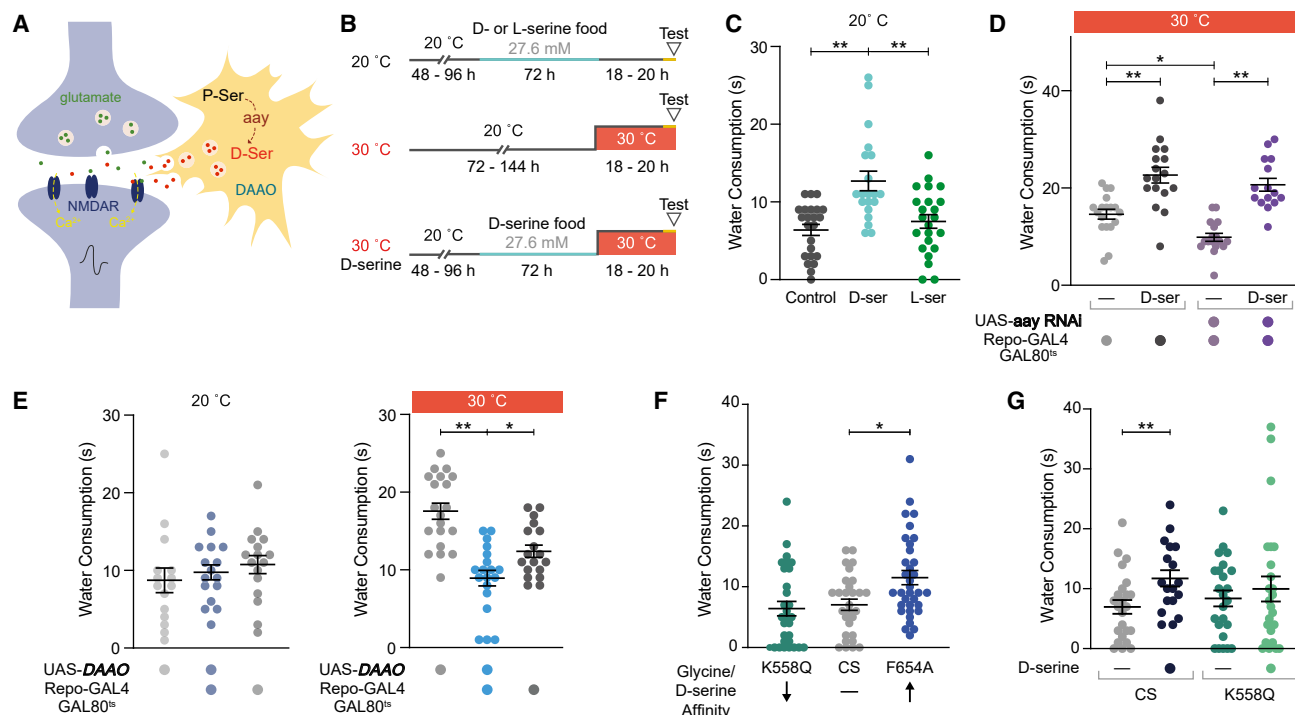

**Figure 4. D-serine modulates water consumption via NMDARs**

(A) Model of tripartite glutamatergic synapse showing *aay*-dependent synthesis of D-serine in astrocytes.

(B) Protocol for D-serine feeding and RNAi induction with water consumption experiments.

(C–G) Light blue section of lines indicate time on D- or L-serine food. Orange section of lines indicate period of water restriction.

(C) D- but not L-serine feeding increases water consumption ( $n = 20$ –23). \*\* $p < 0.01$ , Kruskal-Wallis ANOVA with Dunn's multiple comparisons test.

(D) D-serine feeding rescues the water consumption defect in flies with *aay* knockdown ( $n = 15$ –18). \* $p < 0.05$ , \*\* $p < 0.01$ , ordinary one-way ANOVA with Dunn's multiple comparisons test.

(E) Glial overexpression of D-amino acid oxidase (*DAAO*) reduces water consumption ( $n = 16$ –20). \* $p < 0.05$ , \*\* $p < 0.01$ , ordinary one-way ANOVA with Dunn's multiple comparisons test.

(F) Flies harboring the F654A single site mutation in NMDAR1 exhibit increased water consumption. This mutation increases affinity for glycine/D-serine ( $n = 29$ –34). \* $p < 0.05$ , Kruskal-Wallis ANOVA with Dunn's multiple comparisons test.

(G) Flies harboring the K558Q amino acid substitution in NMDAR1 are insensitive to the D-serine induced increase in water consumption ( $n = 18$ –25). \*\* $p < 0.01$ , two-tailed Mann-Whitney test. Individual data points are single flies. Data are mean  $\pm$  SEM.

See also Figure S4.

pore.<sup>78,79</sup> Bath application of NMDA with D-, but not L-, serine activated PI NR1+ neurons (Figures 5C and 5D). NMDA and glycine also produced excitation but only in  $Mg^{2+}$  free conditions (Figure 5D). D-serine and glycine in 4 mM  $Mg^{2+}$  promoted slower activation, likely due to the voltage-dependent  $Mg^{2+}$  block preventing fast activation. To validate that D-serine activation was occurring via NMDARs, we applied the non-competitive NMDAR antagonist ketamine with NMDA and D-serine (Figure 5E).<sup>80</sup> Ketamine abrogated PI neuron responses to D-serine/NMDA (Figures 5F, 5G, and S5H) confirming that fly NMDARs are activated by D-serine.

### Astrocytes contribute to tripartite synapses in the *Drosophila* brain

Processes from mammalian astrocytes infiltrate the synaptic cleft, forming TPSs.<sup>81</sup> This allows glia to participate in neurotransmission through transmitter uptake and recycling and by release of gliotransmitters.<sup>82</sup> *Drosophila* adult neuromuscular synapses have a tripartite structure,<sup>83</sup> but the detailed anatomy of adult central nervous system (CNS) astrocytes is unclear. To

address this, we analyzed astrocytes in the superior medial protocerebrum (SMP) neuropil within the FlyWire project (flywire.ai)<sup>84</sup> which utilizes the full adult female brain (FAFB) transmission electron microscope dataset.<sup>85</sup> We fully reconstructed 11 astrocytes and four were extensively reviewed to reconstruct their finest processes. These astrocytes tile the neuropil and closely associate with trachea, as previously reported in the larval brain and ventral nerve cord (VNC)<sup>31,86,87</sup> (Figures 5H, S5J, and S5K). We identified astrocytic processes that engulfed synaptic boutons and that contacted synaptic clefts like processes from postsynaptic neurons—the latter providing evidence of canonical TPSs in the adult CNS (Figures 5I and S5L). Astrocytes also often contact the postsynaptic neuron within 500 nm of the synaptic cleft.

To determine whether astrocytes associate with a particular class of synapse, we used the prior computational predictions of neurotransmitter identity for neurons in the FAFB volume.<sup>88</sup> We composed a vicinity profile by measuring distances of synapses from the fine processes of the 3 extensively reviewed SMP astrocytes and plotted their distance distributions

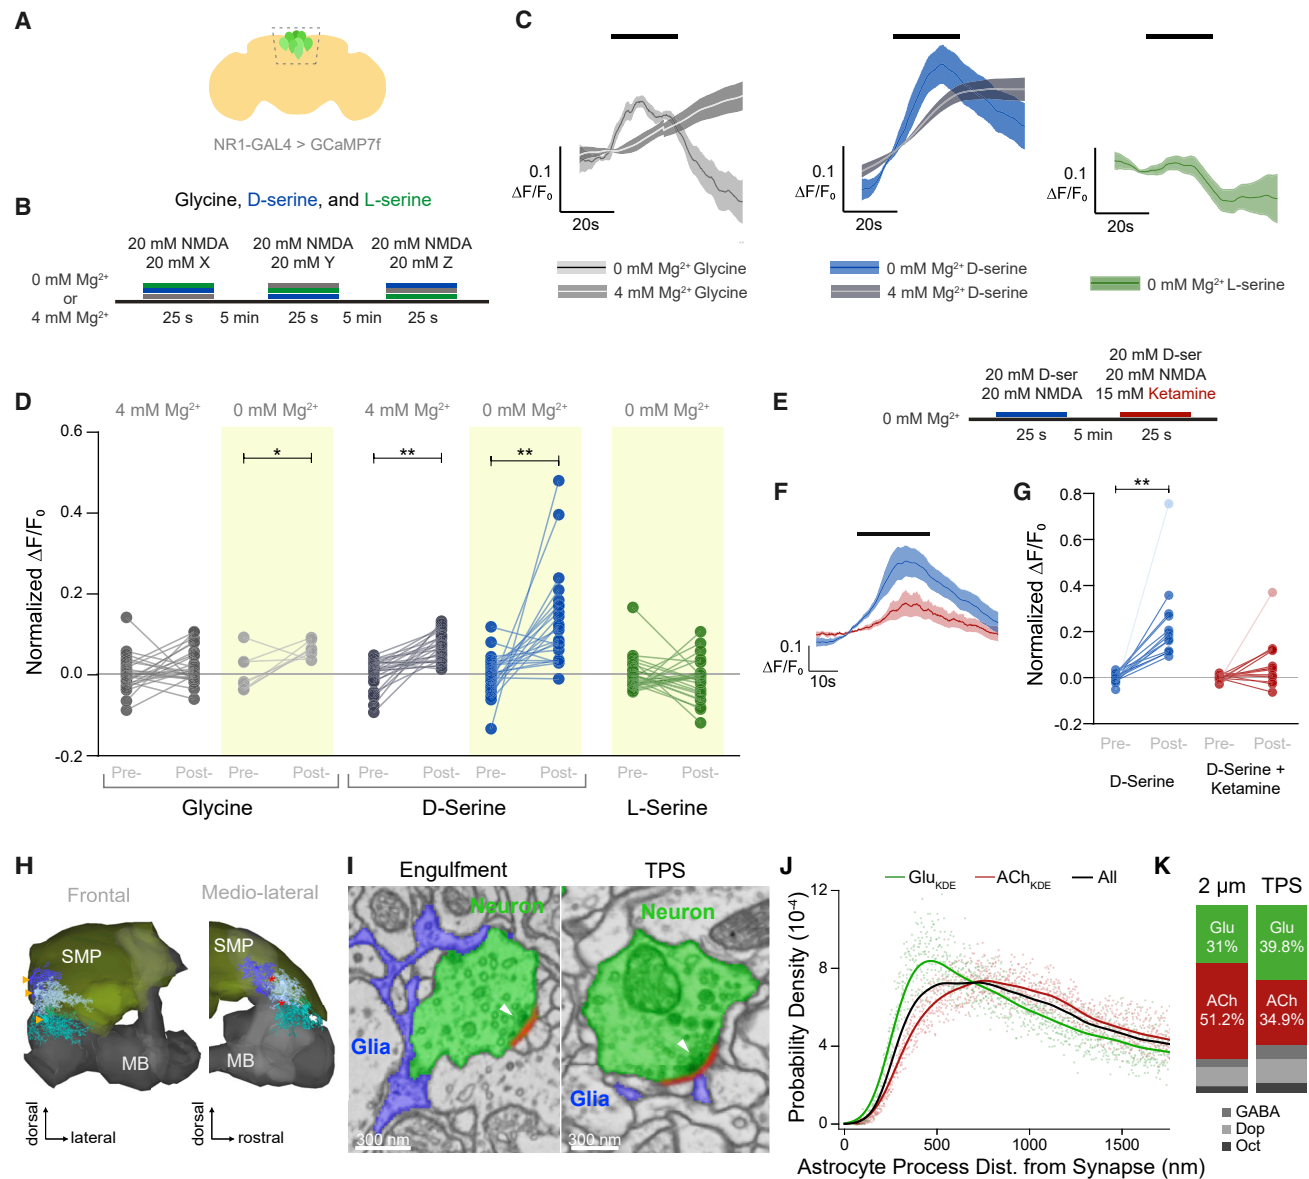

**Figure 5. Astrocytes form tripartite synapses and D-serine is a co-agonist for NMDARs**

(A) Illustration of imaging window for recording of Ca<sup>2+</sup> responses in NMDAR1 expressing PI neurons.

(B) Protocol of drug application for (C) and (D). Order of application was randomized for each fly.

(C) Average traces for glycine, D-serine, and L-serine application in 0 or 4 mM Mg<sup>2+</sup> ( $n_{gly} = 8, 25$ ;  $n_{D-ser} = 25, 26$ ;  $n_{L-ser} = 28$ , respectively). Line is a moving average and shaded band is SEM.

(D) D-serine, but not L-serine, activates NR1+ PI neurons (from left to right,  $n = 25, 25, 8, 8, 25, 23, 23, 28$ , and 28). \* $p < 0.05$ , \*\* $p < 0.001$ , Kruskal-Wallis ANOVA with Dunn's multiple comparisons test.

(E) Protocol for ketamine application with NMDA, TTX, and D-serine.

(F) Averaged traces for D-serine and NMDA (blue) and D-serine, NMDA, and ketamine (red) ( $n = 15$ ).

(G) Ketamine inhibits D-serine induced activation of NR1+ PI neurons. \*\* $p < 0.01$ , Kruskal-Wallis ANOVA with Dunn's multiple comparisons test. Transparent dots indicate outliers that are >2 SD from the mean. When outliers are excluded from the analysis, the relationship still holds (see Figure S5F).

(H) Astrocytes tile the SMP. 3D representation of three astrocytes (shades of blue) reconstructed from EM data shown with the mushroom body neuropil (gray) and the SMP neuropil (yellow), shown in frontal and lateral views. Cell bodies are located outside the neuropil (yellow arrow heads), and processes in the neuropil have little overlap (\*).

(I) Astrocytes engulf synaptic boutons and contribute processes to tripartite synapses (TPSs). Grayscale EM data with labeled glutamatergic boutons (green) and glial processes (blue). Presynaptic densities (arrow) and synaptic cleft (red) are indicated. Left: example where glial processes contact a large proportion of a bouton's membrane but not the synapse. Right: example of a glial process directly adjacent to the synaptic cleft and opposite the presynaptic density (white arrow head).

(legend continued on next page)

categorized by presynaptic neurotransmitter. This analysis revealed astrocytic processes to be significantly closer to glutamatergic ( $962 \pm 2$  nm SD) and GABAergic ( $971 \pm 3$  nm) than cholinergic synapses ( $1,061 \pm 1$  nm) (Figures 5J, 5K, S5M, and S5N). Astrocytes are therefore ideally positioned to modulate glutamatergic synapses in the adult brain.

### Astrocytes show heterogeneous responses to neurotransmitters

Astrocytes have been proposed to facilitate fast synaptic activity by releasing gliotransmitters such as glutamate, ATP, and D-serine.<sup>89</sup> In mammals, glutamate binding to mGluR5 triggers astrocytic D-serine release<sup>90</sup> and the combination of glutamate and D-serine produces maximal NMDAR activation. We therefore tested whether fly astrocytes were responsive to glutamate application by recording *in vivo* astrocytic  $\text{Ca}^{2+}$  responses (*R86E01-GAL4>UAS-GCaMP7f*) (Figures 6A and 6B). We included 1  $\mu\text{M}$  tetrodotoxin (TTX) in the bath to block voltage-gated sodium channels and thereby inhibit polysynaptic neurotransmission. Surprisingly, we could classify astrocytes within individual flies depending on whether bath-applied glutamate evoked an increase, decrease, or no change in GCaMP fluorescence (Figure 6B). We also tested for astrocytic responses to acetylcholine (ACh), the predominant excitatory transmitter in the fly brain, and ATP which triggers  $\text{Ca}^{2+}$  waves in mammalian astrocytes.<sup>91,92</sup> Astrocytes also exhibited differential responses to ACh and ATP (Figures 6C–6F). Moreover, the same astrocytes often exhibited similar responses to the different neurotransmitters. For instance, a substantial proportion of astrocytes were activated both by glutamate and ATP (Figures 6G, 6H, S6A, and S6B), and most of these had matched responses to all three transmitters (Figure 6I).

We used TetX to eliminate all vesicular release and negate the possibility that evoking local transmission accounts for differential astrocytic responses (Figure S6C).<sup>93</sup> Although there was no change in magnitude of astrocyte responses to either ATP or glutamate following 1 h TetX treatment, there was a slight reduction in percentage of ATP responsive astrocytes (Figures 6J–6L and S6F). We verified the effectiveness of TetX by demonstrating that a polysynaptic odor-evoked response in mushroom body output neuron (MBON)- $\gamma 5\beta/2a$  was eliminated (Figures S6D and S6E). Therefore, neurotransmitters evoke direct stereotyped activation or inhibition of astrocytes. Differential astrocytic responses to neuronal activation were reported in the larval VNC.<sup>94</sup>

### Water deprivation modulates functional properties of astrocytes

We next tested whether *in vivo* astrocytic responses to applied neurotransmitters changed in water- and food-deprived flies (Figure 7A). To prevent deprived flies from being “re-satiated” by application of normal extracellular saline, the saline composition was adjusted to reflect the desired physiological state of the

animal.<sup>19,95</sup> Astrocytes did not show a  $\text{Ca}^{2+}$  response to a brief increase in osmolarity (Figure 7B). Similar to sated flies, water- and food-deprived flies showed differential astrocytic responses to glutamate and ATP (Figures 7C–7J and S7A–S7C). However, only water-deprived flies showed an increase in the astrocyte proportion excited by glutamate, whereas ATP responsiveness remained the same (Figures 7F and 7J). Excitatory glutamate and ATP responses also appeared prolonged in thirsty flies compared with controls (Figures 7K, 7L, and S7D). Finally, thirsty flies had a higher proportion of mismatched astrocyte responses to ATP and glutamate, suggesting a loss of correlated responses (Figure S7G). In sum, water deprivation increases the proportion of glutamate-activated astrocytes and sustains glutamate-evoked  $\text{Ca}^{2+}$  responses.

### D-serine promotes water-memory expression

Prior work implicated specific neuronal pathways in regulating water consumption and thirst-dependent control of innate and learned water seeking.<sup>19–22</sup> Since astrocytes broadly innervate the neuropil, we tested whether D-serine promoted water vapor seeking and memory expression in water-sated flies, like it did for drinking. Interestingly, the same 3-day feeding of D-serine that increased drinking did not promote attraction to water vapor (Figure 7M). We next tested thirst-dependent expression of water memory performance. Water-deprived flies were trained to associate an odor with water reward, and after training, they were housed in vials with agarose for 1 h then dry vials containing either nothing, D-serine, or L-serine powder. Only flies fed with D-serine showed 24 h water memory performance (Figure 7N). These data demonstrate that dietary D-serine promotes the expression of water-seeking memory, in addition to drinking behavior.

## DISCUSSION

### Single-cell RNA-seq reveals a glial response to water deprivation

Our scRNA-seq studies of thirst revealed astrocytes and other glia to be the principal transcriptionally responsive cells in the fly brain. We did not identify significant transcriptional changes within peptidergic<sup>18–20</sup> or monoaminergic neurons,<sup>21,22,96</sup> perhaps due to the relative scarcity of these neurons in our datasets. Although glial expression of many genes changed in thirsty flies, our initial loss-of-function RNAi screen only revealed potential roles for *aay*, *inos* (myo-inositol-1-phosphate synthase), and *Drat* in the control of drinking behavior. Results for *inos* and *Drat* were not corroborated by additional testing. Nevertheless, induction of myo-inositol synthesis and uptake is a known cellular response to osmotic stress.<sup>97</sup> *Drat* might also be involved in resistance to stress of dehydration.<sup>98</sup> We similarly speculate that other thirst-regulated genes maintain glial function under stress, without impacting fluid intake in a measurable way.

(J) Astrocytic processes are significantly closer to glutamatergic than cholinergic synapses in the SMP. Kernel density estimates (lines) of the probability distributions (points) of distances of Glu or ACh synapses or a random draw from both sets to 3 SMP based astrocytes. Only synapses in direct vicinity ( $2 \mu\text{m}$  radius around processes  $<600$  nm thick) are considered. Statistical analyses shown in Figure S5.

(K) Glutamatergic synapses are overrepresented in tripartite synapses versus their representation in synapses in the general  $2 \mu\text{m}$  vicinity of astrocytic processes. Ratios of synapses by predicted neurotransmitter usage are shown.

See also Figure S5 and Video S1 for anatomy of astrocyte processes engulfing a presynapse and contributing to TPS.

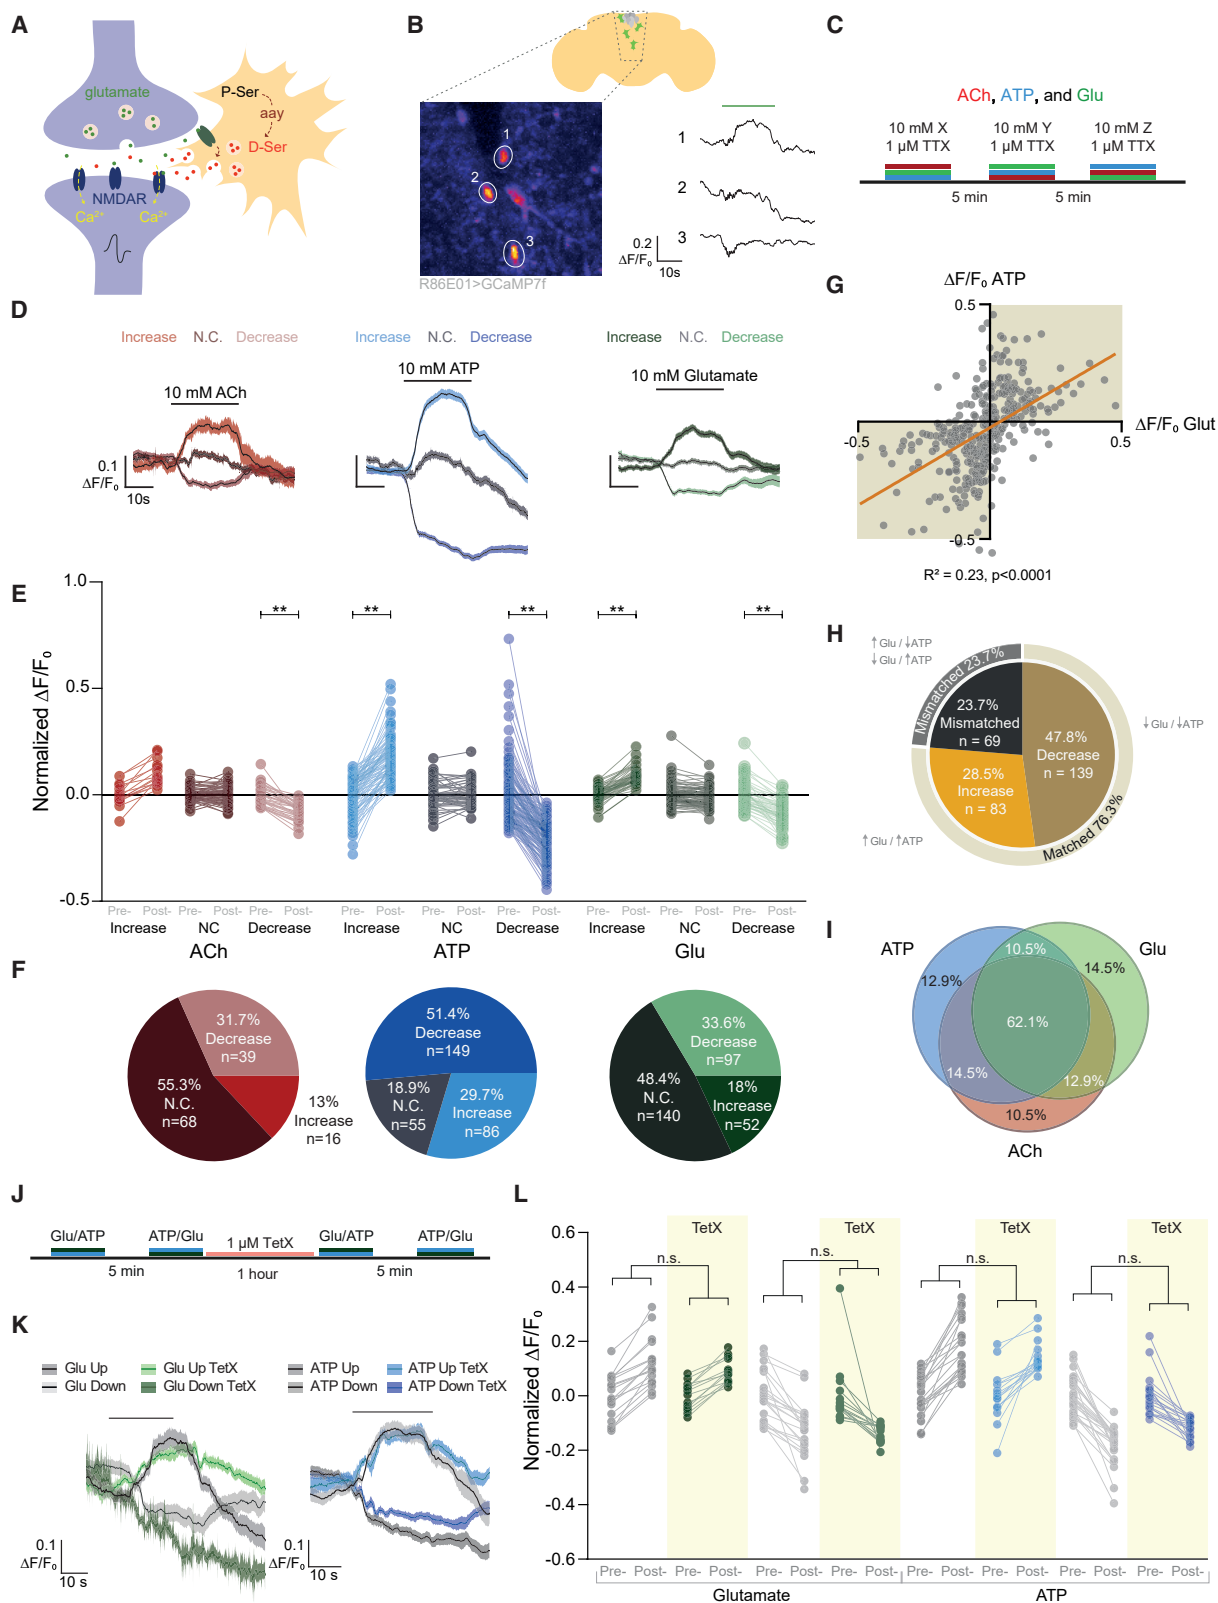

**Figure 6. Astrocytes are differentially responsive to neurotransmitters**

(A) Illustration of possible glutamate-evoked D-serine release from astrocytes.

(B) Astrocytes adjacent to the pars intercerebralis show differential responses to glutamate application (green bar).

(legend continued on next page)

### Glial D-serine is required for motivated water-procuring behaviors

A key approach to verifying a role for D-serine in thirst was the ability to alter fly behavior by providing D-serine in the diet. Dietary D- but not L-serine restored the drinking defect of *aay*-deficient flies. Moreover, feeding D- but not L-serine to water-sated flies mimicked the behavioral effect of water-deprivation—promoting both drinking and water-seeking memory expression. We therefore conclude that gliotransmission of D-serine is an essential element of thirst-state behavioral modulation. Changes in hunger-directed feeding were not evident. At present we do not know if dietary D-serine floods the entire fly and bypasses the need for glial release. Interestingly, although our experiments demonstrated D-serine enantiomer specific *aay* rescue and gain-of-function effects on thirst-related behaviors, a previous study<sup>70</sup> rescued a fly sleep defect with L- and D-serine feeding. However, rescue of sleep depended on intestinal serine racemase conversion of L- to D-serine. Since the authors also identified intestinal NMDAR1 expressing neurons,<sup>70</sup> we speculate that L-serine conversion in the gut produces enough D-serine to alter sleep via that route, but it produces insufficient quantities to act in the brain.<sup>99</sup>

### Does water-deprivation prime astrocytes to release D-serine?

We noted that increased *aay* expression resulted in detection of a larger proportion of astrocytes (74% versus 56%) expressing *aay* following water deprivation (Figure S7E). This potential broadening of expression might indicate that water deprivation induces *aay* to meet a forthcoming demand for D-serine release and/ or to replenish it following release from these astrocytes. Interestingly, a similar number of astrocytes (34% versus 18%) also gained sensitivity to exogenously applied glutamate in thirsty flies. Although we do not know if the same astrocytes are involved, it seems plausible that thirst increases astrocytic expression of *aay* and the number of glutamate responsive astrocytes, so that glutamate-releasing neurons can evoke their D-serine release. Although loss-of-function experiments revealed the importance of astrocytic *aay*, induction also occurred in cortex, ensheathing, and surface glia. The role of *aay* in these other glial types is currently unclear. Elevated expression of *aay*

was attenuated when flies were permitted to quench their thirst, consistent with induction serving an enhanced need for D-serine synthesis.

### Astrocytic D-serine facilitates the activity of glutamatergic circuits

We established that D-serine functions as an NMDAR co-agonist in *Drosophila*, like it does in mammals.<sup>69</sup> Neuronal NMDA-evoked  $\text{Ca}^{2+}$  transients were potentiated by D-serine co-application and blocked by ketamine. Moreover, feeding D-serine did not promote drinking in flies harboring a K558Q point substitution in the NMDAR1 subunit that renders it insensitive to D-serine.<sup>74</sup> Importantly, our ultrastructural analyses identified typical TPSs within the adult fly brain, as well as a new and more common anatomical motif where astrocytic processes engulf presynaptic boutons. Astrocytic processes are therefore well placed to potentially support synaptic transmission acting on either the pre- or post-synaptic neuron. Glial engulfment of presynaptic boutons may permit D-serine or other neuromodulators to regulate extra-synaptic NMDARs or other receptors to tune presynaptic transmitter release. Moreover, astrocytic processes in the SMP appear to be preferentially associated with glutamatergic synapses, despite cholinergic synapses being most abundant in this region. We therefore propose that thirst-regulated astrocyte-released D-serine facilitates NMDA-type currents so that the relevant glutamatergic synapses undergo short-term potentiation, allowing these water-procuring neural circuits to function more efficiently. If D-serine release depends on glutamate-evoked astrocytes at active TPSs, then its use will be need dependent and circuit specific. It is also conceivable that synaptic astrocyte processes can be remodeled by osmosensitive swelling and retraction.<sup>100</sup> Further work is required to locate the critical D-serine modulated synaptic connections in the fly brain. We assume different circuits will underlie D-serine regulated learned water seeking and consumption.<sup>19–22,96</sup>

### Do glia directly sense water deprivation?

Although glia are ideally positioned for both integrating hemolymph metabolic and osmotic states and instructing neuronal activity, we did not observe obvious astrocytic  $\text{Ca}^{2+}$  responses when the osmolarity of the extracellular solution was briefly

(C) Protocol for drug application with randomized order for acetylcholine (ACh), ATP, and glutamate (Glu).

(D) Average traces for ACh, ATP, and glutamate partitioned by the type of response (activated, no change, or inhibited). Responses were determined as follows: activated if  $\mu_{\text{post-drug}} > \sigma_{\text{pre-drug}} + \mu_{\text{pre-drug}}$ , no change if  $\mu_{\text{post-drug}}$  fell within  $\sigma_{\text{pre-drug}} + \mu_{\text{pre-drug}}$  and inhibited if  $\mu_{\text{post-drug}} < \sigma_{\text{pre-drug}} - \mu_{\text{pre-drug}}$ . Line is smoothed average and shaded band is SEM.

(E) Neurotransmitters induce both excitatory and inhibitory responses in astrocytes. Paired datapoints represent responses from a single astrocyte, and group is assembled from multiple flies ( $n_{\text{ACh}} = 16, 68, 39$ ;  $n_{\text{ATP}} = 86, 55, 149$ ;  $n_{\text{glut}} = 52, 140, 97$ ). \*\* $p < 0.01$ , Kruskal-Wallis ANOVA with Dunn's multiple comparisons test.

(F) Proportions of astrocytes sorted by response direction following acetylcholine, ATP, and glutamate application.

(G) Average  $\Delta F/F_0$  during drug application for glutamate plotted against  $\Delta F/F_0$  for ATP shows most astrocytes that are excited by glutamate are also excited by ATP and vice versa.

(H) Astrocytes are more likely to have matched responses between glutamate and ATP. Chi-square test between matched versus mismatched astrocytes. Fisher's exact test matched versus mismatched  $p = 2.35 \times 10^{-11}$ , OR = 3.24.

(I) Venn diagram showing considerable overlap of matched responses of astrocytes to all three neurotransmitters.

(J) Protocol for tetanus toxin (TetX) application.

(K) Average traces for glutamate- and ATP-evoked excitatory and inhibitory responses with and without TetX. Line is smoothed average and shaded band SEM.

(L) Blocking vesicular transmission does not suppress astrocyte responses to transmitter application (left to right,  $n_{\text{Pre-TetX ATP}} = 21, 6$ ;  $n_{\text{Post-TetX ATP}} = 16, 35$ ;  $n_{\text{Pre-TetX Glut}} = 18, 11$ ;  $n_{\text{Post-TetX Glut}} = 14, 9$ ). n.s.  $> 0.05$  Kruskal-Wallis ANOVA with Dunn's multiple comparisons test. Individual data points are single astrocytes across multiple animals.

See also Figure S6.

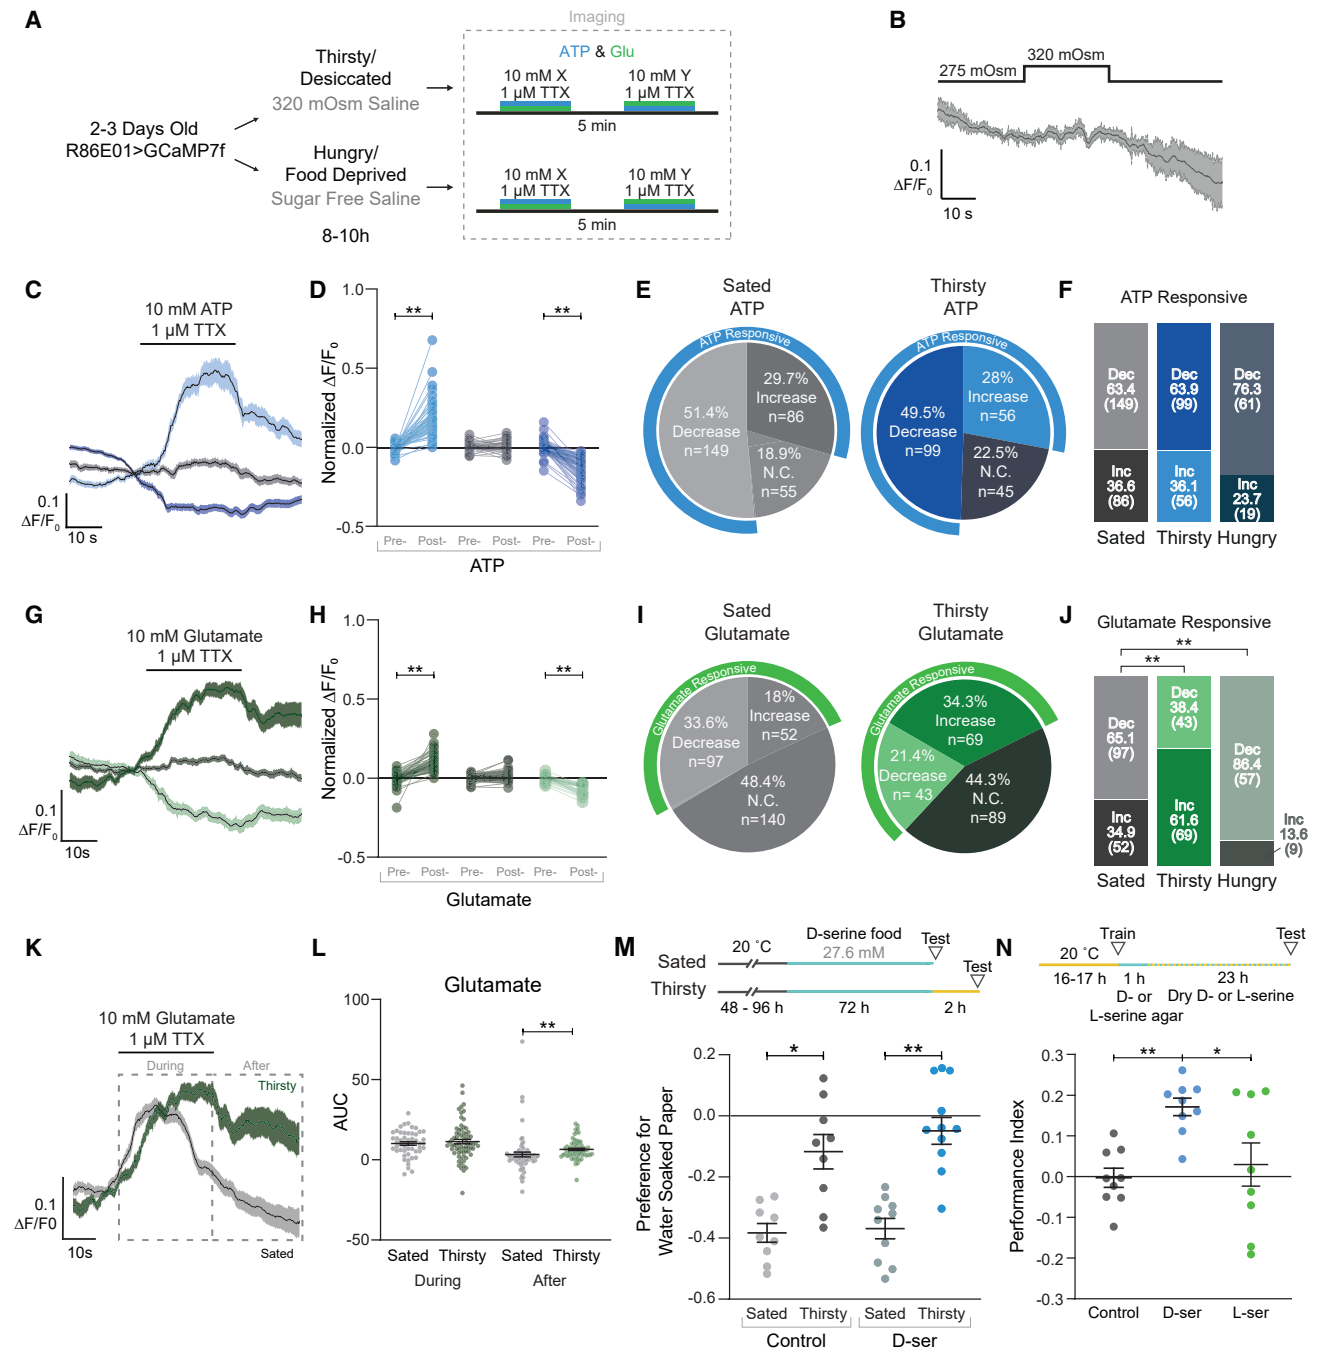

**Figure 7. Water deprivation changes physiological properties of astrocytes**

(A) Protocol for water and food deprivation with calcium imaging experiments.  
 (B) Acute exposure of high osmolarity saline does not induce a calcium response in astrocytes.  
 (C) Average traces for ATP partitioned by response type in thirsty flies. Line is smoothed average and shaded band is SEM.  
 (D) Responses pre- and post-treatment of ATP separated by categorical responses in water-deprived flies.  $p < 0.01$ , Kruskal-Wallis ANOVA with Dunn's multiple comparisons test.  
 (E) Proportion of astrocyte responses to ATP application in sated and thirsty flies.  
 (F) Astrocyte responses to ATP do not change with deprivation states. n.s. > 0.05 Fisher's exact test with Bonferroni correction.  
 (G) Average traces for glutamate partitioned by response type in thirsty flies. Line is smoothed average and shaded band is SEM.  
 (H) Responses pre- and post-treatment of glutamate separated by categorical responses in water-deprived flies.  $p < 0.01$ , Kruskal-Wallis ANOVA with Dunn's multiple comparisons test.  
 (I) Proportions of astrocyte responses type to glutamate application in sated and thirsty flies.

(legend continued on next page)

increased. It is possible that astrocyte activation requires a longer and more sustained exposure to hyperosmotic solution, that they are instead sensitive to hypovolaemic changes, or that water deprivation does not induce an astrocytic  $\text{Ca}^{2+}$  response (we also do not know whether thirst-driven glial transcriptional responses are  $\text{Ca}^{2+}$ -dependent). In addition, although fly perineurial and subperineurial glia provide the barrier between the hemolymph and brain, cortex glia wrap neuronal cell bodies, and astrocytes permeate the neuropil and associate with synaptic compartments. It is therefore plausible that the glia layers permit transduction of osmosensing signals to astrocytes. For example,  $\text{Ca}^{2+}$  oscillations in cortex glia, which require the  $\text{Na}^+/\text{Ca}^{2+}$ ,  $\text{K}^+$  exchanger *zydeco*,<sup>101</sup> could influence astrocyte activity/ $\text{Ca}^{2+}$ , as they are directly connected.<sup>102</sup>

Astrocytic  $\text{Na}^+_{\text{K}}\text{ATPase}$  channels have been implicated in sodium sensing within the mouse SFO.<sup>103</sup> Our scRNA-seq data reveal glial-specific expression of several potential osmo-sensing molecules. Solute carrier transporters such as *Ncc69*, *NKCC*, and *inebriated* (*ine*) localized to glial clusters (Data S2). Interestingly, the *ine*-encoded  $\text{Na}^+/\text{Cl}^-$  dependent neurotransmitter transporter is required for water homeostasis in the Malpighian tubules.<sup>104</sup> Additionally, *ine* negatively regulates neuronal activity, which could be a mechanism by which astrocytes couple osmotic regulation with neurotransmission.<sup>105</sup> Several TRP genes encode mechanosensitive channels responsive to changes in cell volume.<sup>106</sup> The *pain* and *wtrw* TRP genes were exclusively detected in glia (Data S2). Finally, glia exhibit restricted expression of the inwardly rectifying potassium channel genes *Irk2* and *Irk3*, which are necessary for proper fluid excretion and renal function in *Drosophila*.<sup>107</sup> Therefore, glia may sense osmotic changes and regulate osmotic balance in the brain.

### Thirst specificity

Although *Drosophila* are raised in the lab on food containing water, flies possess independent control mechanisms that permit selective food or water seeking.<sup>20–22,96,108</sup> Thirst and hunger are however also coupled on a behavioral and neuronal level. For instance, prandial thirst is triggered by food ingestion to preemptively recalibrate blood osmolality.<sup>4,16,19,109</sup> D-serine apparently distinguishes between water and food consumption. In addition, astrocytes showed opposing physiological changes with food compared with water deprivation (Figure 7J), and thirst-regulated genes barely changed when flies were hungry (Figure S2C). D-serine elevation, either by *aay* overexpression or D-serine feeding, promoted expression of water-seeking memory and water consummatory behaviors. Therefore, astrocytic *aay*-dependent D-serine signaling may provide a more general thirst modulation, as opposed to only regulating seeking<sup>20</sup> or drinking.<sup>19</sup> Further work is required to understand

how thirst-driven D-serine interacts with other thirst-dependent modulatory signals. It will be interesting to determine whether D-serine influences sodium appetite and interacts with modulatory processes relevant to other motivational states.<sup>22,95,110–113</sup>

### Could D-serine be a conserved state-mechanism in mammals?

Thirst alters brain-wide population dynamics in the mouse.<sup>114</sup> Since astrocytes permeate all regions of the brain, it is possible that D-serine contributes to the broad thirst-driven modulation of neural activity. In addition, we note that a lower D-serine serum concentration has been linked to patients suffering from Schizophrenia,<sup>115</sup> 6%–20% of whom are polydipsic.

### STAR★METHODS

Detailed methods are provided in the online version of this paper and include the following:

- KEY RESOURCES TABLE
- RESOURCE AVAILABILITY
  - Lead contact
  - Material availability
  - Data and code availability
- EXPERIMENTAL MODEL AND SUBJECT DETAILS
  - Drosophila strains
- METHOD DETAILS
  - Water preference assays
  - Brain dissociation and cell collection
  - Library preparation, sequencing, and processing
  - Filtering and doublet removal
  - Clustering
  - Annotation
  - Differential expression (DE)
  - Pathway analysis
  - RT-qPCR
  - D-serine Feeding
  - CAFE Assay
  - Manual Feeding Assay
  - Hygrosensation/Water memory in the T-maze
  - Two-Photon Calcium Imaging
  - Solutions
  - NR1+ neuron and astrocyte recordings
  - Identification of astrocytes in EM reconstructions
  - Classification of astrocytic processes
  - Analysis of astrocyte-neuronal type relationship
  - 3D representations
- QUANTIFICATION AND STATISTICAL ANALYSIS
  - Single-cell transcriptomics

(J) Deprivation states differentially regulate astrocyte responsiveness to glutamate application. The number of glutamate responsive astrocytes increases in thirsty flies and decreases in hungry flies. \*\* $p < 0.01$ , Fisher's exact test with Bonferroni correction.

(K) Excitatory astrocyte responses to glutamate application are prolonged in thirsty animals.

(L) Area under the curve (AUC) of sections of traces marked in (K). \*\* $p < 0.01$ , Kruskal-Wallis ANOVA with Dunn's multiple comparisons test.

(M) Flies pre-fed D-serine do not show differences in innate water seeking in the T-maze. \* $p < 0.05$ , \*\* $p < 0.01$ , Kruskal-Wallis ANOVA with Dunn's multiple comparisons test.

(N) Flies fed D-serine between training and testing show increased water memory performance. \* $p < 0.05$ , \*\* $p < 0.01$ , Kruskal-Wallis ANOVA with Dunn's multiple comparisons test. For (D), (H), and (L), individual data points are single astrocytes across multiple animals.

See also Figure S7.

- Behavioral Statistical Analysis
- Two-Photon Calcium Imaging Analysis
- Analysis of astrocyte-neuronal type relationship

## SUPPLEMENTAL INFORMATION

Supplemental information can be found online at <https://doi.org/10.1016/j.cub.2022.07.038>.

## ACKNOWLEDGMENTS

We thank Bernard Moussian, Yi Rao, Stefanie Schirmeir, the Vienna *Drosophila* Resource Center, and Bloomington *Drosophila* Stock Center for flies. We are grateful to Hubert Slawinski at the Wellcome Trust Centre for Human Genetics for running single-cell transcriptomics and sequencing; Lucy Garner, Paul Brodersen, and the Bioconductor community for assistance and advice with single-cell transcriptomics analysis; and Ruth Brain for lab assistance. We thank the Princeton FlyWire team and Murthy and Seung labs for development and maintenance of FlyWire (supported by BRAIN Initiative grant MH117815), and the Princeton EM proofreading team for contributing neuronal edits. We acknowledge Philipp Schlegel for help implementing navis-related code and Joseph Hsu for proof reading astrocyte morphology. We thank members of Waddell, Sims, and Goodwin groups for discussion. A.P., V.C., C.D.T., and S.W. were supported by an ERC Advanced Grant to S.W. (789274). V.C. was additionally supported by starter funds from Durham University; N.O. was funded by Wellcome Collaborative awards to S.W. (203261/Z/16/Z and 221300/Z/20/Z). D.A. was supported by a Wellcome Collaborative Award to D.S. and S.W. (209235/Z/17/Z). E.M. was funded by an EMBO Long-Term Fellowship (ALTF 184-2019). S.W. is also supported by a Wellcome Principal Research Fellowship in Basic Biomedical Sciences (200846/Z/16/Z).

## AUTHOR CONTRIBUTIONS

Designed research, A.P., V.C., N.O., D.A., C.D.T., E.M., and S.W.; performed research, A.P., V.C., N.O., D.A., C.D.T., and E.M.; analyzed data, A.P., V.C., N.O., D.A., C.D.T., D.S., and S.W.; resources, D.S., S.W., and V.C.; writing, S.W., A.P., V.C., and N.O.; supervision, D.S. and S.W.; funding acquisition, S.W. and D.S.

## DECLARATION OF INTERESTS

S.W. is a member of the advisory board of *Current Biology*.

Received: May 23, 2022

Revised: July 4, 2022

Accepted: July 15, 2022

Published: August 12, 2022

## REFERENCES

1. Bourque, C.W. (2008). Central mechanisms of osmosensation and systemic osmoregulation. *Nat. Rev. Neurosci.* 9, 519–531.
2. Fitzsimons, J.T. (1998). Angiotensin, thirst, and sodium appetite. *Physiol. Rev.* 78, 583–686.
3. Pool, A.-H., Wang, T., Stafford, D.A., Chance, R.K., Lee, S., Ngai, J., and Oka, Y. (2020). The cellular basis of distinct thirst modalities. *Nature* 588, 112–117.
4. Augustine, V., Lee, S., and Oka, Y. (2020). Neural control and modulation of thirst, sodium appetite, and hunger. *Cell* 180, 25–32.
5. Johnson, A.K., and Thunhorst, R.L. (1997). The neuroendocrinology of thirst and salt appetite: visceral sensory signals and mechanisms of central integration. *Front. Neuroendocrinol.* 18, 292–353.
6. Rolls, B.J. (1971). The effect of intravenous infusion of antidiuretic hormone on water intake in the rat. *J. Physiol.* 219, 331–339.
7. Zimmerman, C.A., Leib, D.E., and Knight, Z.A. (2017). Neural circuits underlying thirst and fluid homeostasis. *Nat. Rev. Neurosci.* 18, 459–469.
8. Abbott, S.B.G., Machado, N.L.S., Geerling, J.C., and Saper, C.B. (2016). Reciprocal control of drinking behavior by median preoptic neurons in mice. *J. Neurosci.* 36, 8228–8237.
9. Andersson, B., and McCann, S.M. (1955). Drinking, antidiuresis and milk ejection from electrical stimulation within the hypothalamus of the goat. *Acta Physiol. Scand.* 35, 191–201.
10. Augustine, V., Gokce, S.K., Lee, S., Wang, B., Davidson, T.J., Reimann, F., Gribble, F., Deisseroth, K., Lois, C., and Oka, Y. (2018). Hierarchical neural architecture underlying thirst regulation. *Nature* 555, 204–209.
11. Betley, J.N., Xu, S., Cao, Z.F.H., Gong, R., Magnus, C.J., Yu, Y., and Sternson, S.M. (2015). Neurons for hunger and thirst transmit a negative-valence teaching signal. *Nature* 521, 180–185.
12. Chen, Y., Lin, Y.-C., Zimmerman, C.A., Essner, R.A., and Knight, Z.A. (2016). Hunger neurons drive feeding through a sustained, positive reinforcement signal. *eLife* 5, e18640.
13. Gizowski, C., Zaelzer, C., and Bourque, C.W. (2016). Clock-driven vasopressin neurotransmission mediates anticipatory thirst prior to sleep. *Nature* 537, 685–688.
14. Matsuda, T., Hiyama, T.Y., Niimura, F., Matsusaka, T., Fukamizu, A., Kobayashi, K., Kobayashi, K., and Noda, M. (2017). Distinct neural mechanisms for the control of thirst and salt appetite in the subfornical organ. *Nat. Neurosci.* 20, 230–241.
15. Oka, Y., Ye, M., and Zuker, C.S. (2015). Thirst driving and suppressing signals encoded by distinct neural populations in the brain. *Nature* 520, 349–352.
16. Zimmerman, C.A., Lin, Y.-C., Leib, D.E., Guo, L., Huey, E.L., Daly, G.E., Chen, Y., and Knight, Z.A. (2016). Thirst neurons anticipate the homeostatic consequences of eating and drinking. *Nature* 537, 680–684.
17. Zimmerman, C.A., Huey, E.L., Ahn, J.S., Beutler, L.R., Tan, C.L., Kosar, S., Bai, L., Chen, Y., Corpuz, T.V., Madisen, L., et al. (2019). A gut-to-brain signal of fluid osmolarity controls thirst satiation. *Nature* 568, 98–102.
18. Gálíková, M., Dirksen, H., and Nässel, D.R. (2018). The thirsty fly: ion transport peptide (ITP) is a novel endocrine regulator of water homeostasis in *Drosophila*. *PLoS Genet* 14, e1007618.
19. Jourjine, N., Mullaney, B.C., Mann, K., and Scott, K. (2016). Coupled sensing of hunger and thirst signals balances sugar and water consumption. *Cell* 166, 855–866.
20. Landayan, D., Wang, B.P., Zhou, J., and Wolf, F.W. (2021). Thirst interneurons that promote water seeking and limit feeding behavior in *Drosophila*. *eLife* 10, e66286.
21. Lin, S., Oswald, D., Chandra, V., Talbot, C., Huetteroth, W., and Waddell, S. (2014). Neural correlates of water reward in thirsty *Drosophila*. *Nat. Neurosci.* 17, 1536–1542.
22. Senapati, B., Tsao, C.-H., Juan, Y.-A., Chiu, T.-H., Wu, C.-L., Waddell, S., and Lin, S. (2019). A neural mechanism for deprivation state-specific expression of relevant memories in *Drosophila*. *Nat. Neurosci.* 22, 2029–2039.
23. Persidsky, Y., Ramirez, S.H., Haorah, J., and Kanmogne, G.D. (2006). Blood-brain barrier: structural components and function under physiologic and pathologic conditions. *J. Neuroimmune Pharmacol.* 1, 223–236.
24. Fischer, R., Schliess, F., and Häussinger, D. (1997). Characterization of the hypo-osmolarity-induced Ca<sup>2+</sup> response in cultured rat astrocytes. *Glia* 20, 51–58.
25. Gourine, A.V., and Kasparov, S. (2011). Astrocytes as brain interoceptors. *Exp. Physiol.* 96, 411–416.
26. Limmer, S., Weiler, A., Volkenhoff, A., Babatz, F., and Klämbt, C. (2014). The *Drosophila* blood-brain barrier: development and function of a glial endothelium. *Front. Neurosci.* 8, 365.

27. Ronaldson, P.T., and Davis, T.P. (2020). Regulation of blood-brain barrier integrity by microglia in health and disease: A therapeutic opportunity. *J. Cereb. Blood Flow Metab.* **40**, S6–S24.
28. Simard, M., and Nedergaard, M. (2004). The neurobiology of glia in the context of water and ion homeostasis. *Neuroscience* **129**, 877–896.
29. Teschemacher, A.G., Gourine, A.V., and Kasparov, S. (2015). A role for astrocytes in sensing the brain microenvironment and neuro-metabolic integration. *Neurochem. Res.* **40**, 2386–2393.
30. de Tredern, E., Rabah, Y., Pasquer, L., Minatchy, J., Plaças, P.-Y., and Preat, T. (2021). Glial glucose fuels the neuronal pentose phosphate pathway for long-term memory. *Cell Rep* **36**, 109620.
31. Stork, T., Sheehan, A., Tasdemir-Yilmaz, O.E., and Freeman, M.R. (2014). Neuron-glia interactions through the heartless FGF receptor signaling pathway mediate morphogenesis of drosophila astrocytes. *Neuron* **83**, 388–403.
32. Volkenhoff, A., Weiler, A., Letzel, M., Stehling, M., Klämbt, C., and Schirmeier, S. (2015). Glial glycolysis is essential for neuronal survival in drosophila. *Cell Metab* **22**, 437–447.
33. Croset, V., Treiber, C.D., and Waddell, S. (2018). Cellular diversity in the *Drosophila* midbrain revealed by single-cell transcriptomics. *eLife* **7**, e34550.
34. Davie, K., Janssens, J., Koldere, D., De Waegeneer, M., Pech, U., Kreft, L., Aibar, S., Makhzami, S., Christiaens, V., Bravo González-Blas, C., et al. (2018). A single-cell transcriptome atlas of the aging drosophila brain. *Cell* **174**, 982–998.e20.
35. Konstantinides, N., Kapuralin, K., Fadil, C., Barboza, L., Satija, R., and Desplan, C. (2018). Phenotypic convergence: distinct transcription factors regulate common terminal features. *Cell* **174**, 622–635.e13.
36. Özel, M.N., Simon, F., Jafari, S., Holguera, I., Chen, Y.-C., Benhra, N., El-Danaf, R.N., Kapuralin, K., Malin, J.A., Konstantinides, N., et al. (2021). Neuronal diversity and convergence in a visual system developmental atlas. *Nature* **589**, 88–95.
37. Janssens, J., Aibar, S., Taskiran, I.I., Ismail, J.N., Gomez, A.E., Aughey, G., Spanier, K.I., De Rop, F.V., González-Blas, C.B., Dionne, M., et al. (2022). Decoding gene regulation in the fly brain. *Nature* **601**, 630–636.
38. Liu, L., Li, Y., Wang, R., Yin, C., Dong, Q., Hing, H., Kim, C., and Welsh, M.J. (2007). *Drosophila* hygrosensation requires the TRP channels water witch and nanchung. *Nature* **450**, 294–298.
39. Sayeed, O., and Benzer, S. (1996). Behavioral genetics of thermosensation and hygrosensation in *Drosophila*. *Proc. Natl. Acad. Sci. USA* **93**, 6079–6084.
40. Barnstedt, O., Oswald, D., Felsenberg, J., Brain, R., Moszynski, J.-P., Talbot, C.B., Perrat, P.N., and Waddell, S. (2016). Memory-relevant mushroom body output synapses are cholinergic. *Neuron* **89**, 1237–1247.
41. Brunet Avalos, C., Maier, G.L., Bruggmann, R., and Sprecher, S.G. (2019). Single cell transcriptome atlas of the *Drosophila* larval brain. *eLife* **8**, e50354.
42. Hwang, B., Lee, J.H., and Bang, D. (2018). Single-cell RNA sequencing technologies and bioinformatics pipelines. *Exp. Mol. Med.* **50**, 1–14.
43. Kharchenko, P.V., Silberstein, L., and Scadden, D.T. (2014). Bayesian approach to single-cell differential expression analysis. *Nat. Methods* **11**, 740–742.
44. Mou, T., Deng, W., Gu, F., Pawitan, Y., and Vu, T.N. (2019). Reproducibility of methods to detect differentially expressed genes from single-cell RNA sequencing. *Front. Genet.* **10**, 1331.
45. Soneson, C., and Robinson, M.D. (2018). Bias, robustness and scalability in single-cell differential expression analysis. *Nat. Methods* **15**, 255–261.
46. Risso, D., Perraudeau, F., Gribkova, S., Dudoit, S., and Vert, J.-P. (2018). A general and flexible method for signal extraction from single-cell RNA-seq data. *Nat. Commun.* **9**, 284.
47. Van den Berge, K., Perraudeau, F., Soneson, C., Love, M.I., Risso, D., Vert, J.P., Robinson, M.D., Dudoit, S., and Clement, L. (2018). Observation weights unlock bulk RNA-seq tools for zero inflation and single-cell applications. *Genome Biol* **19**, 24.
48. Love, M.I., Huber, W., and Anders, S. (2014). Moderated estimation of fold change and dispersion for RNA-seq data with DESeq2. *Genome Biol* **15**, 550.
49. Robinson, M.D., McCarthy, D.J., and Smyth, G.K. (2010). edgeR: a Bioconductor package for differential expression analysis of digital gene expression data. *Bioinformatics* **26**, 139–140.
50. Lakhota, S.C. (2011). Forty years of the 93D puff of *Drosophila melanogaster*. *J. Biosci.* **36**, 399–423.
51. Qin, W., Neal, S.J., Robertson, R.M., Westwood, J.T., and Walker, V.K. (2005). Cold hardening and transcriptional change in *Drosophila melanogaster*. *Insect Mol. Biol.* **14**, 607–613.
52. Ray, M., Acharya, S., Shambhavi, S., and Lakhota, S.C. (2019). Over-expression of Hsp83 in grossly depleted hsrw lncRNA background causes synthetic lethality and l(2)gl phenocopy in *Drosophila*. *J. Biosci.* **44**, 36.
53. Liu, Y., Luo, J., Carlsson, M.A., and Nässel, D.R. (2015). Serotonin and insulin-like peptides modulate leucokinin-producing neurons that affect feeding and water homeostasis in *Drosophila*. *J. Comp. Neurol.* **523**, 1840–1863.
54. Kumar, S., Chen, D., Jang, C., Nall, A., Zheng, X., and Sehgal, A. (2014). An ecdysone-responsive nuclear receptor regulates circadian rhythms in *Drosophila*. *Nat. Commun.* **5**, 5697.
55. Ja, W.W., Carvalho, G.B., Mak, E.M., Rosa, N.N. de la, Fang, A.Y., Liong, J.C., Brummel, T., and Benzer, S. (2007). Prandiology of *Drosophila* and the CAFE assay. *Proc. Natl. Acad. Sci. USA* **104**, 8253–8256.
56. McGuire, S.E., Le, P.T., Osborn, A.J., Matsumoto, K., and Davis, R.L. (2003). Spatiotemporal rescue of memory dysfunction in *Drosophila*. *Science* **302**, 1765–1768.
57. Park, A., Tran, T., and Atkinson, N.S. (2018). Monitoring food preference in *Drosophila* by oligonucleotide tagging. *Proc. Natl. Acad. Sci. U. S. A.* **115**, 9020–9025.
58. Kremer, M.C., Jung, C., Batelli, S., Rubin, G.M., and Gaul, U. (2017). The glia of the adult *Drosophila* nervous system. *Glia* **65**, 606–638.
59. Prokopenko, S.N., He, Y., Lu, Y., and Bellen, H.J. (2000). Mutations affecting the development of the peripheral nervous system in *Drosophila*: a molecular screen for novel proteins. *Genetics* **156**, 1691–1715.
60. Salzberg, A., D'Evelyn, D., Schulze, K.L., Lee, J.K., Strumpf, D., Tsai, L., and Bellen, H.J. (1994). Mutations affecting the pattern of the PNS in *Drosophila* reveal novel aspects of neuronal development. *Neuron* **13**, 269–287.
61. Wood, P.L., Hawkinson, J.E., and Goodnough, D.B. (1996). Formation of D-serine from L-phosphoserine in brain synaptosomes. *J. Neurochem.* **67**, 1485–1490.
62. Kang, N., Peng, H., Yu, Y., Stanton, P.K., Guilarte, T.R., and Kang, J. (2013). Astrocytes release D-serine by a large vesicle. *Neuroscience* **240**, 243–257.
63. Martineau, M., Galli, T., Baux, G., and Mothet, J.-P. (2008). Confocal imaging and tracking of the exocytotic routes for D-serine-mediated gliotransmission. *Glia* **56**, 1271–1284.
64. Mothet, J.-P., Pollegioni, L., Ouanounou, G., Martineau, M., Fossier, P., and Baux, G. (2005). Glutamate receptor activation triggers a calcium-dependent and SNARE protein-dependent release of the gliotransmitter D-serine. *Proc. Natl. Acad. Sci. USA* **102**, 5606–5611.
65. Mustafa, A.K., Kim, P.M., and Snyder, S.H. (2004). D-serine as a putative glial neurotransmitter. *Neuron Glia Biol* **1**, 275–281.
66. Schell, M.J., Brady, R.O., Molliver, M.E., and Snyder, S.H. (1997). D-serine as a neuromodulator: regional and developmental localizations in rat brain glia resemble NMDA receptors. *J. Neurosci.* **17**, 1604–1615.
67. Zhang, Y.V., Ormerod, K.G., and Littleton, J.T. (2017). Astrocyte Ca<sup>2+</sup> influx negatively regulates neuronal activity. *eNeuro* **4**, 0340–16.2017.

68. Kleckner, N.W., and Dingledine, R. (1988). Requirement for glycine in activation of NMDA-receptors expressed in *Xenopus* oocytes. *Science* 241, 835–837.
69. Mothet, J.-P., Parent, A.T., Wolosker, H., Brady, R.O., Linden, D.J., Ferris, C.D., Rogawski, M.A., and Snyder, S.H. (2000). d-serine is an endogenous ligand for the glycine site of the N-methyl-D-aspartate receptor. *Proc. Natl. Acad. Sci. USA* 97, 4926–4931.
70. Dai, X., Zhou, E., Yang, W., Zhang, X., Zhang, W., and Rao, Y. (2019). D-serine made by serine racemase in *Drosophila* intestine plays a physiological role in sleep. *Nat. Commun.* 10, 1986.
71. Pollegioni, L., Piubelli, L., Sacchi, S., Pilone, M.S., and Molla, G. (2007). Physiological functions of D-amino acid oxidases: from yeast to humans. *Cell. Mol. Life Sci.* 64, 1373–1394.
72. Laube, B., Hirai, H., Sturgess, M., Betz, H., and Kuhse, J. (1997). Molecular determinants of agonist discrimination by NMDA receptor subunits: analysis of the glutamate binding site on the NR2B subunit. *Neuron* 18, 493–503.
73. Miller, R.F. (2004). D-serine as a glial modulator of nerve cells. *Glia* 47, 275–283.
74. Troutwine, B., Park, A., Velez-Hernandez, M.E., Lew, L., Mihic, S.J., and Atkinson, N.S. (2019). F654A and K558Q mutations in NMDA receptor 1 affect ethanol-induced behaviors in *drosophila*. *Alcohol. Clin. Exp. Res.* 43, 2480–2493.
75. Yoneda, Y., Suzuki, T., Ogita, K., and Han, D. (1993). Support for radio-labeling of a glycine recognition domain on the N-methyl-D-aspartate receptor ionophore complex by 5,7-[3H]dichlorokynurenate in rat brain. *J. Neurochem.* 60, 634–645.
76. Dickinson, R., Peterson, B.K., Banks, P., Simillis, C., Martin, J.C.S., Valenzuela, C.A., Maze, M., and Franks, N.P. (2007). Competitive inhibition at the glycine site of the N-methyl-D-aspartate receptor by the anesthetics xenon and isoflurane: evidence from molecular modeling and electrophysiology. *Anesthesiology* 107, 756–767.
77. Wafford, K.A., Kathoria, M., Bain, C.J., Marshall, G., Le Bourdellès, B., Kemp, J.A., and Whiting, P.J. (1995). Identification of amino acids in the N-methyl-D-aspartate receptor NR1 subunit that contribute to the glycine binding site. *Mol. Pharmacol.* 47, 374–380.
78. Ascher, P., and Nowak, L. (1987). Electrophysiological studies of NMDA receptors. *Trends Neurosci* 10, 284–288.
79. Mori, H., Masaki, H., Yamakura, T., and Mishina, M. (1992). Identification by mutagenesis of a Mg(2+)-block site of the NMDA receptor channel. *Nature* 358, 673–675.
80. Martin, D., and Lodge, D. (1985). Ketamine acts as a non-competitive N-methyl-D-aspartate antagonist on frog spinal cord *in vitro*. *Neuropharmacology* 24, 999–1003.
81. Ventura, R., and Harris, K.M. (1999). Three-dimensional relationships between hippocampal synapses and astrocytes. *J. Neurosci.* 19, 6897–6906.
82. Santello, M., Cali, C., and Bezzi, P. (2012). Gliotransmission and the tripartite synapse. *Adv. Exp. Med. Biol.* 970, 307–331.
83. Danjo, R., Kawasaki, F., and Ordway, R.W. (2011). A tripartite synapse model in *drosophila*. *PLoS One* 6, e17131.
84. Dorkenwald, S., McKellar, C.E., Macrina, T., Kemnitz, N., Lee, K., Lu, R., Wu, J., Popovych, S., Mitchell, E., Nehoran, B., et al. (2022). FlyWire: online community for whole-brain connectomics. *Nat. Methods* 19, 119–128.
85. Zheng, Z., Lauritzen, J.S., Perlman, E., Robinson, C.G., Nichols, M., Milkie, D., Torrens, O., Price, J., Fisher, C.B., Sharifi, N., et al. (2018). A complete electron microscopy volume of the brain of adult *Drosophila melanogaster*. *Cell* 174, 730–743.e22.
86. Ma, Z., and Freeman, M.R. (2020). TrpML-mediated astrocyte microdomain Ca<sup>2+</sup> transients regulate astrocyte–tracheal interactions. *eLife* 9, e58952.
87. Pereanu, W., Spindler, S., Cruz, L., and Hartenstein, V. (2007). Tracheal development in the *Drosophila* brain is constrained by glial cells. *Dev. Biol.* 302, 169–180.
88. Eckstein, N., Bates, A.S., Du, M., Hartenstein, V., Jefferis, G.S.X.E., and Funke, J. (2020). Neurotransmitter classification from electron microscopy images at synaptic sites in *Drosophila*. Preprint at bioRxiv. <https://doi.org/10.1101/2020.06.12.148775>.
89. Savtchouk, I., and Volterra, A. (2018). Gliotransmission: Beyond black-and-white. *J. Neurosci.* 38, 14–25.
90. Mustafa, A.K., van Rossum, D.B., Patterson, R.L., Maag, D., Ehmsen, J.T., Gazi, S.K., Chakraborty, A., Barrow, R.K., Amzel, L.M., and Snyder, S.H. (2009). Glutamatergic regulation of serine racemase via reversal of PIP<sub>2</sub> inhibition. *Proc. Natl. Acad. Sci. USA* 106, 2921–2926.
91. Guthrie, P.B., Knappenberger, J., Segal, M., Bennett, M.V., Charles, A.C., and Kater, S.B. (1999). ATP released from astrocytes mediates glial calcium waves. *J. Neurosci.* 19, 520–528.
92. Lee, D., and O'Dowd, D.K. (1999). Fast excitatory synaptic transmission mediated by nicotinic acetylcholine receptors in *Drosophila* neurons. *J. Neurosci.* 19, 5311–5321.
93. Yamasaki, S., Baumeister, A., Binz, T., Blasi, J., Link, E., Cornille, F., Roques, B., Fykse, E.M., Südhof, T.C., and Jahn, R. (1994). Cleavage of members of the synaptobrevin/VAMP family by types D and F botulin neurotoxins and tetanus toxin. *J. Biol. Chem.* 269, 12764–12772.
94. MacNamee, S.E., Liu, K.E., Gerhard, S., Tran, C.T., Fetter, R.D., Cardona, A., Tolbert, L.P., and Oland, L.A. (2016). Astrocytic glutamate transport regulates a *Drosophila* CNS synapse that lacks astrocyte ensheathment. *J. Comp. Neurol.* 524, 1979–1998.
95. Cheriyaunkunel, S.J., Rose, S., Jacob, P.F., Blackburn, L.A., Glasgow, S., Moorse, J., Winstanley, M., Moynihan, P.J., Waddell, S., and Rezaval, C. (2021). A neuronal mechanism controlling the choice between feeding and sexual behaviors in *Drosophila*. *Curr. Biol.* S0960–9822, 00984–00982.
96. Hsu, T.M., Bazzino, P., Hurh, S.J., Konanur, V.R., Roitman, J.D., and Roitman, M.F. (2020). Thirst recruits phasic dopamine signaling through subfornical organ neurons. *Proc. Natl. Acad. Sci. USA* 117, 30744–30754.
97. Sacchi, R., Li, J., Villarreal, F., Gardell, A.M., and Kultz, D. (2013). Salinity-induced regulation of the myo-inositol biosynthesis pathway in tilapia gill epithelium. *J. Exp. Biol.* 216, 4626–4638.
98. Chen, P., Tu, X., Akdemir, F., Chew, S.K., Rothenfluh, A., and Abrams, J.M. (2012). Effectors of alcohol-induced cell killing in *Drosophila*. *Cell Death Differ* 19, 1655–1663.
99. Tomita, J., Ueno, T., Mitsuyoshi, M., Kume, S., and Kume, K. (2015). The NMDA receptor promotes sleep in the fruit fly, *Drosophila melanogaster*. *PLoS One* 10, e0128101.
100. Wang, Y.-F., and Parpura, V. (2018). Astroglial modulation of hydromineral balance and cerebral edema. *Front. Mol. Neurosci.* 11, 204.
101. Melom, J.E., and Littleton, J.T. (2013). Mutation of a NCKX eliminates glial microdomain calcium oscillations and enhances seizure susceptibility. *J. Neurosci.* 33, 1169–1178.
102. Farca Luna, A.J., Perier, M., and Seugnet, L. (2017). Amyloid precursor protein in *Drosophila* glia regulates sleep and genes involved in glutamate recycling. *J. Neurosci.* 37, 4289–4300.
103. Shimizu, H., Watanabe, E., Hiya, T.Y., Nagakura, A., Fujikawa, A., Okado, H., Yanagawa, Y., Obata, K., and Noda, M. (2007). Glial Nax Channels control lactate signaling to neurons for brain [Na<sup>+</sup>] sensing. *Neuron* 54, 59–72.
104. Luan, Z., Quigley, C., and Li, H.-S. (2015). The putative Na<sup>+</sup>/Cl<sup>−</sup>-dependent neurotransmitter/osmolyte transporter inebriated in the *Drosophila* hindgut is essential for the maintenance of systemic water homeostasis. *Sci. Rep.* 5, 7993.
105. Huang, Y., and Stern, M. (2002). In vivo properties of the *drosophila* inebriated-encoded neurotransmitter transporter. *J. Neurosci.* 22, 1698–1708.

106. Pedersen, S.F., Kapus, A., and Hoffmann, E.K. (2011). Osmosensory mechanisms in cellular and systemic volume regulation. *J. Am. Soc. Nephrol.* 22, 1587–1597.
107. Evans, J.M., Allan, A.K., Davies, S.A., and Dow, J.A.T. (2005). Sulphonylurea sensitivity and enriched expression implicate inward rectifier K<sup>+</sup> channels in *Drosophila melanogaster* renal function. *J. Exp. Biol.* 208, 3771–3783.
108. Krashes, M.J., DasGupta, S., Vreede, A., White, B., Armstrong, J.D., and Waddell, S. (2009). A neural circuit mechanism integrating motivational state with memory expression in *Drosophila*. *Cell* 139, 416–427.
109. Gutman, Y., and Krausz, M. (1969). Regulation of food and water intake in rats as related to plasma osmolarity and volume. *Physiol. Behav.* 4, 311–313.
110. Jung, Y., Kennedy, A., Chiu, H., Mohammad, F., Claridge-Chang, A., and Anderson, D.J. (2020). Neurons that function within an integrator to promote a persistent behavioral state in *drosophila*. *Neuron* 105, 322–333.e5.
111. McKinley, M.J., Denton, D.A., Ryan, P.J., Yao, S.T., Stefanidis, A., and Oldfield, B.J. (2019). From sensory circumventricular organs to cerebral cortex: neural pathways controlling thirst and hunger. *J. Neuroendocrinol.* 31, e12689.
112. Stricker, E.M., and Hoffmann, M.L. (2007). Presystemic signals in the control of thirst, salt appetite, and vasopressin secretion. *Physiol. Behav.* 91, 404–412.
113. Zhang, S.X., Miner, L.E., Boutros, C.L., Rogulja, D., and Crickmore, M.A. (2018). Motivation, perception, and chance converge to make a binary decision. *Neuron* 99, 376–388.e6.
114. Allen, W.E., Chen, M.Z., Pichamoorthy, N., Tien, R.H., Pachitariu, M., Luo, L., and Deisseroth, K. (2019). Thirst regulates motivated behavior through modulation of brainwide neural population dynamics. *Science* 364, 253.
115. Hons, J., Zirko, R., Vasatova, M., Doubek, P., Klimova, B., Masopust, J., Valis, M., and Kuca, K. (2021). Impairment of executive functions associated with lower D-serine serum levels in patients with schizophrenia. *Front. Psychiatry* 12, 514579.
116. Thurmond, J., Goodman, J.L., Strelets, V.B., Attrill, H., Gramates, L.S., Marygold, S.J., Matthews, B.B., Millburn, G., Antonazzo, G., Trovisco, V., et al. (2019). FlyBase 2.0: the next generation. *Nucleic Acids Res* 47, D759–D765.
117. Burke, C.J., Huetteroth, W., Oswald, D., Perisse, E., Krashes, M.J., Das, G., Gohl, D., Silies, M., Certel, S., and Waddell, S. (2012). Layered reward signalling through octopamine and dopamine in *Drosophila*. *Nature* 492, 433–437.
118. Gohl, D.M., Silies, M.A., Gao, X.J., Bhalerao, S., Luongo, F.J., Lin, C.-C., Potter, C.J., and Clandinin, T.R. (2011). A versatile in vivo system for directed dissection of gene expression patterns. *Nat. Methods* 8, 231–237.
119. Wang, Y., Norum, M., Oehl, K., Yang, Y., Zuber, R., Yang, J., Farine, J.P., Gehring, N., Flötenmeyer, M., Ferveur, J.F., et al. (2020). Dysfunction of Oskyddad causes Harlequin-type ichthyosis-like defects in *Drosophila melanogaster*. *PLoS Genet* 16, e1008363.
120. Kitamoto, T. (2001). Conditional modification of behavior in *Drosophila* by targeted expression of a temperature-sensitive shibire allele in defined neurons. *J. Neurobiol.* 47, 81–92.
121. Paradis, S., Sweeney, S.T., and Davis, G.W. (2001). Homeostatic control of presynaptic release is triggered by postsynaptic membrane depolarization. *Neuron* 30, 737–749.
122. Sweeney, S.T., Broadie, K., Keane, J., Niemann, H., and O’Kane, C.J. (1995). Targeted expression of tetanus toxin light chain in *Drosophila* specifically eliminates synaptic transmission and causes behavioral defects. *Neuron* 14, 341–351.
123. Dana, H., Sun, Y., Mohar, B., Hulse, B.K., Kerlin, A.M., Hasseman, J.P., Tsegaye, G., Tsang, A., Wong, A., Patel, R., et al. (2019). High-performance calcium sensors for imaging activity in neuronal populations and microcompartments. *Nat. Methods* 16, 649–657.
124. Hafemeister, C., and Satija, R. (2019). Normalization and variance stabilization of single-cell RNA-seq data using regularized negative binomial regression. *Genome Biol* 20, 296.
125. Stuart, T., Butler, A., Hoffman, P., Hafemeister, C., Papalexi, E., Mauck, W.M., Hao, Y., Stoeckius, M., Smibert, P., and Satija, R. (2019). Comprehensive integration of single-cell data. *Cell* 177, 1888–1902.e21.
126. McGinnis, C.S., Murrow, L.M., and Gartner, Z.J. (2019). DoubletFinder: doublet detection in single-cell RNA sequencing data using artificial nearest neighbors. *cells* 8, 329–337.e4.
127. McCarthy, D.J., Chen, Y., and Smyth, G.K. (2012). Differential expression analysis of multifactor RNA-Seq experiments with respect to biological variation. *Nucleic Acids Res* 40, 4288–4297.
128. Yu, G., Wang, L.-G., Han, Y., and He, Q.-Y. (2012). clusterProfiler: an R package for comparing biological themes among gene clusters. *OMICS A J. Integr. Biol.* 16, 284–287.
129. Walter, W., Sánchez-Cabo, F., and Ricote, M. (2015). GOrilla: an R package for visually combining expression data with functional analysis. *Bioinformatics* 31, 2912–2914.
130. Pologruto, T.A., Sabatini, B.L., and Svoboda, K. (2003). ScanImage: flexible software for operating laser scanning microscopes. *Biomed. Eng. OnLine* 2, 13.
131. Schindelin, J., Arganda-Carreras, I., Frise, E., Kaynig, V., Longair, M., Pietzsch, T., Preibisch, S., Rueden, C., Saalfeld, S., Schmid, B., et al. (2012). Fiji: an open-source platform for biological-image analysis. *Nat. Methods* 9, 676–682.
132. Au, O.K.-C., Tai, C.-L., Chu, H.-K., Cohen-Or, D., and Lee, T.-Y. (2008). Skeleton extraction by mesh contraction. *ACM Trans. Graph.* 27, 1–10.
133. Aso, Y., Sitaraman, D., Ichinose, T., Kaun, K.R., Vogt, K., Bellart-Guérin, G., Plaçais, P.Y., Robie, A.A., Yamagata, N., Schnaitmann, C., et al. (2014). Mushroom body output neurons encode valence and guide memory-based action selection in *Drosophila*. *eLife* 3, e04580.
134. Lee, B.P., and Jones, B.W. (2005). Transcriptional regulation of the *Drosophila* glial gene repo. *Mech. Dev.* 122, 849–862.
135. Sepp, K.J., and Auld, V.J. (1999). Conversion of lacZ enhancer trap lines to GAL4 lines using targeted transposition in *Drosophila melanogaster*. *Genetics* 151, 1093–1101.
136. Kelley, R.L., and Kuroda, M.I. (2003). The *Drosophila* roX1 RNA gene can overcome silent chromatin by recruiting the male-specific lethal dosage compensation complex. *Genetics* 164, 565–574.
137. Sun, B., and Salvaterra, P.M. (1995). Two *Drosophila* nervous system antigens, Nervana 1 and 2, are homologous to the beta subunit of Na<sup>+</sup>/K<sup>+</sup>-ATPase. *Proc. Natl. Acad. Sci. USA* 92, 5396–5400.
138. Aggarwal, C.C., Hinneburg, A., and Keim, D.A. (2001). On the surprising behavior of distance metrics in high dimensional space. In *Database Theory — ICDT 2001 Lecture Notes in Computer Science*, J. Van den Bussche, and V. Vianu, eds. (Springer), pp. 420–434.
139. Bellman, R. (1961). *Adaptive Control Processes: A Guided Tour* (Princeton University Press).
140. Komiyama, T., and Luo, L. (2007). Intrinsic control of precise dendritic targeting by an ensemble of transcription factors. *Curr. Biol.* 17, 278–285.
141. Komiyama, T., Johnson, W.A., Luo, L., and Jefferis, G.S.X.E. (2003). From lineage to wiring specificity. POU domain transcription factors control precise connections of *Drosophila* olfactory projection neurons. *Cell* 112, 157–167.
142. Lai, S.-L., Awasaki, T., Ito, K., and Lee, T. (2008). Clonal analysis of *Drosophila* antennal lobe neurons: diverse neuronal architectures in the lateral neuroblast lineage. *Development* 135, 2883–2893.
143. Becnel, J., Johnson, O., Luo, J., Nässel, D.R., and Nichols, C.D. (2011). The serotonin 5-HT<sub>7</sub> receptor is expressed in the brain of *drosophila*, and is essential for normal courtship and mating. *PLoS One* 6, e20800.

144. Donlea, J.M., Pimentel, D., and Miesenböck, G. (2014). Neuronal machinery of sleep homeostasis in *Drosophila*. *Neuron* 81, 860–872.
145. Kunst, M., Hughes, M.E., Raccuglia, D., Felix, M., Li, M., Barnett, G., Duah, J., and Nitabach, M.N. (2014). Calcitonin gene-related peptide neurons mediate sleep-specific circadian output in *Drosophila*. *Curr. Biol.* 24, 2652–2664.
146. Zhao, Z., Zhao, X., He, T., Wu, X., Lv, P., Zhu, A.J., and Du, J. (2021). Epigenetic regulator Stuxnet modulates octopamine effect on sleep through a Stuxnet-Polycomb-Oct $\beta$ 2R cascade. *EMBO Rep* 22, e47910.
147. Nässel, D.R., Enell, L.E., Santos, J.G., Wegener, C., and Johard, H.A. (2008). A large population of diverse neurons in the *Drosophila* central nervous system expresses short neuropeptide F, suggesting multiple distributed peptide functions. *BMC Neurosci* 9, 90.
148. Johard, H.A.D., Enell, L.E., Gustafsson, E., Trifilieff, P., Veenstra, J.A., and Nässel, D.R. (2008). Intrinsic neurons of *Drosophila* mushroom bodies express short neuropeptide F: relations to extrinsic neurons expressing different neurotransmitters. *J. Comp. Neurol.* 507, 1479–1496.
149. Neckameyer, W.S., and Quinn, W.G. (1989). Isolation and characterization of the gene for *drosophila* tyrosine hydroxylase. *Neuron* 2, 1167–1175.
150. Pörzgen, P., Park, S.K., Hirsh, J., Sonders, M.S., and Amara, S.G. (2001). The antidepressant-sensitive dopamine transporter in *Drosophila melanogaster*: a primordial carrier for catecholamines. *Mol. Pharmacol.* 59, 83–95.
151. Coleman, C.M., and Neckameyer, W.S. (2005). Serotonin synthesis by two distinct enzymes in *Drosophila melanogaster*. *Arch. Insect Biochem. Physiol.* 59, 12–31.
152. Demchyshyn, L.L., Pristupa, Z.B., Sugamori, K.S., Barker, E.L., Blakely, R.D., Wolfgang, W.J., Forte, M.A., and Niznik, H.B. (1994). Cloning, expression, and localization of a chloride-facilitated, cocaine-sensitive serotonin transporter from *Drosophila melanogaster*. *Proc. Natl. Acad. Sci. USA* 91, 5158–5162.
153. Cole, S.H., Carney, G.E., McClung, C.A., Willard, S.S., Taylor, B.J., and Hirsh, J. (2005). Two functional but noncomplementing *drosophila* tyrosine decarboxylase genes distinct roles for neural tyramine and octopamine in female fertility. *J. Biol. Chem.* 280, 14948–14955.
154. Monastirioti, M., Linn, C.E., and White, K. (1996). Characterization of *Drosophila* tyramine beta-hydroxylase gene and isolation of mutant flies lacking octopamine. *J. Neurosci.* 16, 3900–3911.
155. Davla, S., Artiushin, G., Li, Y., Chitsaz, D., Li, S., Sehgal, A., and van Meyel, D.J. (2020). AANAT1 functions in astrocytes to regulate sleep homeostasis. *eLife* 9, e53994.
156. Doherty, J., Logan, M.A., Taşdemir, O.E., and Freeman, M.R. (2009). Ensheathing glia function as phagocytes in the adult *Drosophila* brain. *J. Neurosci.* 29, 4768–4781.
157. Muthukumar, A.K., Stork, T., and Freeman, M.R. (2014). Activity-dependent regulation of astrocyte GAT levels during synaptogenesis. *Nat. Neurosci.* 17, 1340–1350.
158. DeSalvo, M.K., Hindle, S.J., Rusan, Z.M., Orng, S., Eddison, M., Halliwill, K., and Bainton, R.J. (2014). The *Drosophila* surface glia transcriptome: evolutionary conserved blood-brain barrier processes. *Front. Neurosci.* 8, 346.
159. Lin, A.C., Bygrave, A.M., de Calignon, A., Lee, T., and Miesenböck, G. (2014). Sparse, decorrelated odor coding in the mushroom body enhances learned odor discrimination. *Nat. Neurosci.* 17, 559–568.
160. Jacob, P.F., and Waddell, S. (2020). Spaced training forms complementary long-term memories of opposite valence in *drosophila*. *Neuron* 106, 977–991.e4.
161. Oswald, D., Felsenberg, J., Talbot, C.B., Das, G., Perisse, E., Huetteroth, W., and Waddell, S. (2015). Activity of defined mushroom body output neurons underlies learned olfactory behavior in *Drosophila*. *Neuron* 86, 417–427.
162. Lee, K., Zung, J., Li, P., Jain, V., and Seung, H.S. (2017). Superhuman accuracy on the SNEMI3D connectomics challenge. Preprint at arXiv. arXiv:1706.00120.
163. Otto, N., Pleijzier, M.W., Morgan, I.C., Edmondson-Stait, A.J., Heinz, K.J., Stark, I., Dempsey, G., Ito, M., Kapoor, I., Hsu, J., et al. (2020). Input connectivity reveals additional heterogeneity of dopaminergic reinforcement in *drosophila*. *Curr. Biol.* 30, 3200–3211.e8.
164. Schneider-Mizell, C.M., Gerhard, S., Longair, M., Kazimiers, T., Li, F., Zwart, M.F., Champion, A., Midgley, F.M., Fetter, R.D., Saalfeld, S., et al. (2016). Quantitative neuroanatomy for connectomics in *Drosophila*. *eLife* 5, e12059.
165. Buhmann, J., Sheridan, A., Malin-Mayor, C., Schlegel, P., Gerhard, S., Kazimiers, T., Krause, R., Nguyen, T.M., Heinrich, L., Lee, W.-C.A., et al. (2021). Automatic detection of synaptic partners in a whole-brain *Drosophila* electron microscopy data set. *Nat. Methods* 18, 771–774.

## STAR★METHODS

### KEY RESOURCES TABLE

| REAGENT or RESOURCE                                                                                    | SOURCE                                                           | IDENTIFIER                                                    |
|--------------------------------------------------------------------------------------------------------|------------------------------------------------------------------|---------------------------------------------------------------|
| <b>Chemicals, peptides, and recombinant proteins</b>                                                   |                                                                  |                                                               |
| Drierite, 8 mesh                                                                                       | ACROS Organics / Fisher Scientific                               | Cat#10185130                                                  |
| Schneider's culture medium                                                                             | Gibco / Thermo Fisher Scientific                                 | Cat#21720024                                                  |
| d(-)-2-amino-5-phosphonopentanoic acid                                                                 | Sigma-Aldrich                                                    | Cat#A8054                                                     |
| DNQX                                                                                                   | Sigma-Aldrich                                                    | Cat#D0540                                                     |
| Tetrodotoxin                                                                                           | Abcam                                                            | Cat#ab120054                                                  |
| DPBS (calcium and magnesium free)                                                                      | Gibco / Thermo Fisher Scientific                                 | Cat#14190086                                                  |
| Papain                                                                                                 | Sigma-Aldrich                                                    | Cat#P4762                                                     |
| Collagenase I                                                                                          | Sigma-Aldrich                                                    | Cat#C2674                                                     |
| DAPI                                                                                                   | Thermo Fisher Scientific                                         | Cat#D1306                                                     |
| BSA                                                                                                    | New England Biolabs                                              | Cat#B9000S                                                    |
| D-Serine                                                                                               | Tokyo Chemical Industry                                          | Cat#S0033                                                     |
| L-Serine                                                                                               | Tokyo Chemical Industry                                          | Cat#S0035                                                     |
| Glycine                                                                                                | Sigma-Aldrich                                                    | Cat#G8898                                                     |
| N-methyl-D-aspartic acid                                                                               | Sigma-Aldrich                                                    | Cat#M3262                                                     |
| Acetylcholine                                                                                          | Sigma-Aldrich                                                    | Cat#A6625                                                     |
| Adenosine Tri-Pphosphate                                                                               | Sigma-Aldrich                                                    | Cat#A2383                                                     |
| Glutamate                                                                                              | Sigma-Aldrich                                                    | Cat#G0355000                                                  |
| Adenosine                                                                                              | Sigma-Aldrich                                                    | Cat#A9251                                                     |
| Tetanus toxin                                                                                          | Sigma-Aldrich                                                    | Cat#T3194                                                     |
| $\alpha,\beta$ -methylene adenosine 5'-diphosphate                                                     | Sigma-Aldrich                                                    | Cat#M3763                                                     |
| 4-Methylcyclohexanol (98%)                                                                             | Sigma-Aldrich                                                    | Cat#153095                                                    |
| 3-octanol (99%)                                                                                        | Sigma-Aldrich                                                    | Cat#218405                                                    |
| <b>Critical commercial assays</b>                                                                      |                                                                  |                                                               |
| Chromium Single Cell 3' Library & Gel Bead Kit v2, 4 rxns                                              | 10X Genomics                                                     | Cat#PN-120267                                                 |
| LightCycler 480 Probes Master                                                                          | Roche                                                            | Cat#4887301001                                                |
| RNeasy Mini Kit                                                                                        | Qiagen                                                           | Cat#74104                                                     |
| SuperScript III First-Strand Synthesis SuperMix                                                        | Invitrogen                                                       | Cat#18080400                                                  |
| Universal Probe Library                                                                                | Roche                                                            | Cat#04683633001; Cat#04869877001                              |
| LightCycler 480 Probes Master                                                                          | Roche                                                            | Cat#4887301001                                                |
| <b>Deposited data</b>                                                                                  |                                                                  |                                                               |
| Raw sequencing data and processed dataset                                                              | This study                                                       | GEO: GSE207799                                                |
| Drosophila melanogaster reference genome (dm6) and gene annotations (FlyBase, release 6.25, FB2018_06) | Thurmond et al. <sup>116</sup>                                   | <a href="https://flybase.org/">https://flybase.org/</a>       |
| Full Adult Female Brain (FAFB) transmission electron microscope (TEM) dataset                          | Zheng et al. <sup>85</sup>                                       | <a href="https://temca2data.org/">https://temca2data.org/</a> |
| <b>Experimental models: Organisms/strains</b>                                                          |                                                                  |                                                               |
| <i>Drosophila</i> : 0273-GAL4                                                                          | Burke et al. <sup>117</sup> and Gohl et al. <sup>118</sup>       | N/A                                                           |
| <i>Drosophila</i> : w; repo-GAL4, tub-GAL80ts; repo-GAL4                                               | S. Schirmeir & C. Klämbt                                         | N/A                                                           |
| <i>Drosophila</i> : R86E01-GAL4                                                                        | Bloomington Drosophila Stock Center; Kremer et al. <sup>58</sup> | RRID:BDSC_45914                                               |
| <i>Drosophila</i> : R85G01-GAL4                                                                        | Bloomington Drosophila Stock Center; Kremer et al. <sup>58</sup> | RRID:BDSC_40436                                               |

(Continued on next page)

**Continued**

| REAGENT or RESOURCE                                | SOURCE                                         | IDENTIFIER                       |
|----------------------------------------------------|------------------------------------------------|----------------------------------|
| <i>Drosophila</i> : R66C08-GAL4                    | Bloomington <i>Drosophila</i> Stock Center     | RRID:BDSC_49412                  |
| <i>Drosophila</i> : UAS-mCherry                    | NA                                             | Lab stock                        |
| <i>Drosophila</i> : UAS-aay <sup>RNAi</sup>        | Vienna <i>Drosophila</i> RNAi Center           | RRID:FlyBase_FBst0454865         |
| <i>Drosophila</i> : <i>Inos</i> <sup>RNAi</sup>    | Vienna <i>Drosophila</i> RNAi Center           | RRID:FlyBase_FBst0472636         |
| <i>Drosophila</i> : UAS-GstD1 <sup>RNAi</sup>      | Vienna <i>Drosophila</i> RNAi Center           | RRID:FlyBase_FBst0475105         |
| <i>Drosophila</i> : UAS-CG33970 <sup>RNAi</sup>    | Vienna <i>Drosophila</i> RNAi Center           | RRID:FlyBase_FBst0462630         |
| <i>Drosophila</i> : UAS-Socs36E <sup>RNAi</sup>    | Vienna <i>Drosophila</i> RNAi Center           | RRID:FlyBase_FBst0469597         |
| <i>Drosophila</i> : UAS-Irc <sup>RNAi</sup>        | Vienna <i>Drosophila</i> RNAi Center           | RRID:FlyBase_FBst0472971         |
| <i>Drosophila</i> : UAS-GstD9 <sup>RNAi</sup>      | Vienna <i>Drosophila</i> RNAi Center           | RRID:FlyBase_FBst0475656         |
| <i>Drosophila</i> : UAS-Obp44a <sup>RNAi</sup>     | Vienna <i>Drosophila</i> RNAi Center           | RRID:FlyBase_FBst0464970         |
| <i>Drosophila</i> : UAS-Sod3 <sup>RNAi</sup>       | Vienna <i>Drosophila</i> RNAi Center           | RRID:FlyBase_FBst0471232         |
| <i>Drosophila</i> : UAS-CG9377 <sup>RNAi</sup>     | Vienna <i>Drosophila</i> RNAi Center           | RRID:FlyBase_FBst0464792         |
| <i>Drosophila</i> : UAS-Cyp28d1 <sup>RNAi</sup>    | Vienna <i>Drosophila</i> RNAi Center           | RRID:FlyBase_FBst0470866         |
| <i>Drosophila</i> : UAS-Pcyt2 <sup>RNAi</sup>      | Vienna <i>Drosophila</i> RNAi Center           | RRID:FlyBase_FBst0477620         |
| <i>Drosophila</i> : UAS-Drat <sup>RNAi</sup>       | Vienna <i>Drosophila</i> RNAi Center           | RRID:FlyBase_FBst0480136         |
| <i>Drosophila</i> : UAS-CG33970 (osy)              | Bernard Moussian; Wang et al. <sup>119</sup>   | N/A                              |
| <i>Drosophila</i> : UAS-aay                        | FlyORF                                         | RRID:FlyBase_FBst0501667         |
| <i>Drosophila</i> : UAS-GstD9                      | FlyORF                                         | F004171                          |
| <i>Drosophila</i> : UAS-Obp44a                     | FlyORF                                         | F003929                          |
| <i>Drosophila</i> : UAS-Sod3                       | FlyORF                                         | F003855                          |
| <i>Drosophila</i> : UAS-Daao1                      | Dai et al. <sup>70</sup>                       | N/A                              |
| <i>Drosophila</i> : UAS-Shi <sup>ts1</sup>         | Kitamoto <sup>120</sup>                        | Lab stock                        |
| <i>Drosophila</i> : UAS-Kir2.1                     | Paradis et al. <sup>121</sup>                  | Lab stock                        |
| <i>Drosophila</i> : UAS-TNT E                      | Sweeney et al. <sup>122</sup>                  | Lab stock                        |
| <i>Drosophila</i> : UAS-GCamP7f                    | Dana et al. <sup>123</sup>                     | RRID:BDSC_79031; RRID:BDSC_80906 |
| <i>Drosophila</i> : <i>NMDAR1</i> <sup>K558Q</sup> | Nigel Atkinson; Troutwine et al. <sup>74</sup> | N/A                              |
| <i>Drosophila</i> : <i>NMDAR1</i> <sup>F654A</sup> | Nigel Atkinson; Troutwine et al. <sup>74</sup> | N/A                              |

**Oligonucleotides**

|                          |            |                      |
|--------------------------|------------|----------------------|
| TTCGCGAGGATGAATACGAT     | This study | <i>SdhA</i> – FWD    |
| CACGAGAGCGTGTGCTTG       | This study | <i>SdhA</i> – REV    |
| AAAAAGCTCCGGGAAAAAGG     | This study | <i>GAPDH</i> – FWD   |
| AATTCCGATCTTCGACATGG     | This study | <i>GAPDH</i> – REV   |
| CACCATGAAGAACGCTGTTG     | This study | <i>Obp44</i> – FWD   |
| GCTTGTAAGTCGGAGGCAGAG    | This study | <i>Obp44</i> – REV   |
| CCGTTTCCACGACATTGAGT     | This study | <i>Drat</i> – FWD    |
| GTTAATGCCTTGATGGGGAAC    | This study | <i>Drat</i> – REV    |
| TGGCTCCCTTTATCCCAAG      | This study | <i>GstD9</i> – FWD   |
| AAAAACAGGCGCTGATTGAT     | This study | <i>GstD9</i> – REV   |
| CGGTGACTCCCTTACCGTAG     | This study | <i>GstD1</i> – FWD   |
| TTTGGCCACCTCGAATGT       | This study | <i>GstD1</i> – REV   |
| AAAAAGCCAGCAAACCAAAA     | This study | <i>Socs36E</i> – FWD |
| AGGTGATGACCCATTGGAAG     | This study | <i>Socs36E</i> – REV |
| TGCAATGGGTGGAATTCAG      | This study | <i>Irc</i> – FWD     |
| ACCATTTCGAAGCAGGAATC     | This study | <i>Irc</i> – REV     |
| CCCCTGAAAAACGTCTATGC     | This study | <i>aay</i> – FWD     |
| AGCTATCGTATTCGCCCAAA     | This study | <i>aay</i> – REV     |
| AGTGCTGTAATATCCCCGATAAAC | This study | <i>CG9377</i> – FWD  |
| CAGAGATCATGGCGTCCTC      | This study | <i>CG9377</i> – REV  |

(Continued on next page)

### Continued

| REAGENT or RESOURCE    | SOURCE     | IDENTIFIER  |
|------------------------|------------|-------------|
| ACCGCTCTTTATGGACTTTGAG | This study | Pcyt2 – FWD |
| GCATGGCCTTGTCATCGTA    | This study | Pcyt2 – REV |

### Software and algorithms

|                   |                                                                        |                                                                                                                                                                                                             |
|-------------------|------------------------------------------------------------------------|-------------------------------------------------------------------------------------------------------------------------------------------------------------------------------------------------------------|
| Cell Ranger       | 10X Genomics                                                           | <a href="https://support.10xgenomics.com/single-cell-gene-expression/software/overview/welcome">https://support.10xgenomics.com/single-cell-gene-expression/software/overview/welcome</a> ; RRID:SCR_017344 |
| R                 | R Development Core Team, 2008                                          | <a href="http://www.R-project.org/">http://www.R-project.org/</a> ; RRID:SCR_001905                                                                                                                         |
| Seurat v3         | Hafemeister and Satija <sup>124</sup> and Stuart et al. <sup>125</sup> | <a href="https://satijalab.org/seurat/">https://satijalab.org/seurat/</a> ; RRID:SCR_016341                                                                                                                 |
| DoubletFinder     | McGinnis et al. <sup>126</sup>                                         | <a href="https://github.com/chris-mcginis-ucsf/DoubletFinder">https://github.com/chris-mcginis-ucsf/DoubletFinder</a> ; RRID:SCR_018771                                                                     |
| ZINB-WaVE         | Risso et al. <sup>46</sup> and Van den Berge et al. <sup>47</sup>      | <a href="https://github.com/drisso/zinbwave">https://github.com/drisso/zinbwave</a>                                                                                                                         |
| DESeq2            | Love et al. <sup>48</sup>                                              | <a href="https://bioconductor.org/packages/release/bioc/html/DESeq2.html">https://bioconductor.org/packages/release/bioc/html/DESeq2.html</a> ; RRID:SCR_015687                                             |
| edgeR             | Robinson et al. <sup>49</sup> and McCarthy et al. <sup>127</sup>       | <a href="https://bioconductor.org/packages/release/bioc/html/edgeR.html">https://bioconductor.org/packages/release/bioc/html/edgeR.html</a> ; RRID:SCR_012802                                               |
| ClusterProfiler   | Yu et al. <sup>128</sup>                                               | <a href="https://github.com/YuLab-SMU/clusterProfiler">https://github.com/YuLab-SMU/clusterProfiler</a>                                                                                                     |
| GOplot            | Walter et al. <sup>129</sup>                                           | <a href="https://wencke.github.io/">https://wencke.github.io/</a>                                                                                                                                           |
| ScanImage 3.8     | Pologruto et al. <sup>130</sup>                                        | <a href="http://scanimage.vidrotechnologies.com">http://scanimage.vidrotechnologies.com</a>                                                                                                                 |
| Fiji              | NIH; Schindelin et al. <sup>131</sup>                                  | <a href="https://fiji.sc/">https://fiji.sc/</a>                                                                                                                                                             |
| FlyWire           | Dorkenwald et al. <sup>84</sup>                                        | <a href="https://flywire.ai/">https://flywire.ai/</a>                                                                                                                                                       |
| Neuroglancer      | Dorkenwald et al. <sup>84</sup>                                        | <a href="https://github.com/google/neuroglancer">https://github.com/google/neuroglancer</a>                                                                                                                 |
| CAVEclient        |                                                                        | <a href="https://github.com/seung-lab/CAVEclient">https://github.com/seung-lab/CAVEclient</a>                                                                                                               |
| FAFBseg v.1.4     |                                                                        | <a href="https://github.com/navis-org/fafbseg-py">https://github.com/navis-org/fafbseg-py</a>                                                                                                               |
| Navis v.0.6       |                                                                        | <a href="https://github.com/navis-org/navis">https://github.com/navis-org/navis</a>                                                                                                                         |
| trimesh           |                                                                        | <a href="https://github.com/mikedh/trimesh">https://github.com/mikedh/trimesh</a>                                                                                                                           |
| skeletor 1.1      | Au et al. <sup>132</sup>                                               | <a href="https://github.com/navis-org/skeletor">https://github.com/navis-org/skeletor</a>                                                                                                                   |
| Blender 3.0       | Blender Community                                                      | <a href="https://www.blender.org/download/releases/3-0/">https://www.blender.org/download/releases/3-0/</a>                                                                                                 |
| GraphPad Prism 9  | GraphPad Software                                                      | <a href="https://www.graphpad.com/scientific-software/prism/">https://www.graphpad.com/scientific-software/prism/</a> ; RRID:SCR_002798                                                                     |
| Adobe Illustrator | Adobe Systems                                                          | <a href="https://www.adobe.com/uk/products/illustrator.html">https://www.adobe.com/uk/products/illustrator.html</a> ; RRID:SCR_010279                                                                       |

### Other

|                                                                 |                   |                  |
|-----------------------------------------------------------------|-------------------|------------------|
| 10 mm CellTrix strainer                                         | Sysmex            | Cat#04-0042-2314 |
| Fuchs-Rosenthal haemocytometer                                  | VWR               | Cat#631-1096     |
| Fisherbrand chromatography paper 180g/m <sup>2</sup> 460x570 mm | Fisher Scientific | Cat#15649494     |

## RESOURCE AVAILABILITY

### Lead contact

Further information and requests for resources and reagents should be directed to and will be fulfilled by the lead contact, Scott Waddell ([scott.waddell@cncb.ox.ac.uk](mailto:scott.waddell@cncb.ox.ac.uk)).

Correspondence regarding the single-cell transcriptomic data and its analysis should be addressed to Vincent Croset ([vincent.croset@durham.ac.uk](mailto:vincent.croset@durham.ac.uk)).

### Material availability

This study did not generate new unique reagents.

### Data and code availability

Single-cell RNA-seq data have been deposited at GEO and are publicly available as of the date of publication. Accession numbers are listed in the [key resources table](#).

Detailed code for scSeq analyses is available at <https://github.com/sims-lab/FlyThirst>. Any additional information required to re-analyze the data reported in this paper is available from the lead contact upon request.

All data reported in this paper will be shared by the lead contact upon request.

## EXPERIMENTAL MODEL AND SUBJECT DETAILS

### Drosophila strains

GAL4 drivers used in this study are 0273-GAL4,<sup>117,118</sup> R66C08-GAL4 (MBON- $\gamma$ 5 $\beta$ '2a),<sup>133</sup> repo-GAL4, tub-GAL80ts; repo-GAL4,<sup>56,134,135</sup> R86E01-GAL4<sup>58</sup> and R85G01-GAL4.<sup>58</sup> UAS lines are w; +; UAS-mCherry, UAS-aay<sup>RNAi</sup> (VDRC, 23179), UAS-Inos<sup>RNAi</sup> (VDRC, 100763), UAS-GstD1<sup>RNAi</sup> (VDRC, 103246), UAS-CG33970<sup>RNAi</sup> (VDRC, 38661), UAS-Socs36E<sup>RNAi</sup> (VDRC, 51821), UAS-Irc<sup>RNAi</sup> (VDRC, 101098), UAS-GstD9<sup>RNAi</sup> (VDRC, 103798), UAS-Obp44a<sup>RNAi</sup> (VDRC, 43203), UAS-Sod3<sup>RNAi</sup> (VDRC, 8760), UAS-CG9377<sup>RNAi</sup> (VDRC, 42835), UAS-Cyp28d1<sup>RNAi</sup> (VDRC, 7870), UAS-Pcyt2<sup>RNAi</sup> (VDRC, 105794), UAS-Drat<sup>RNAi</sup> (VDRC, 108325), UAS-osy,<sup>119</sup> UAS-GstD9 (FlyORF, F004171), UAS-Obp44a (FlyORF, F003929), UAS-Sod3 (FlyORF, F003855), UAS-aay (FlyORF, F002296), UAS-CG12338,<sup>70</sup> UAS-Sh<sup>ts1</sup>,<sup>120</sup> UAS-Kir2.1,<sup>121</sup> UAS-TNT E,<sup>122</sup> UAS-GCaMP-7f.<sup>123</sup> Mutant strains are *NMDAR1*<sup>K558Q</sup> and *NMDAR1*<sup>F654A</sup>.<sup>74</sup> Flies were raised on standard cornmeal food under a 12:12 light:dark cycle at 60% humidity and 25°C, unless otherwise stated. 3-day old mixed sex flies were used for single-cell transcriptomics, 3-6 day old mixed sex flies for water preference, RT-qPCR and imaging experiments, and 3-8 day old male flies for water consumption tests.

## METHOD DETAILS

### Water preference assays

Dehydration and water preference assays were performed as described.<sup>21</sup> Briefly, groups of 50-100 flies were stored for a given time period in vials containing a ~2 cm layer of Drierite topped with a piece of cotton and a dried sucrose-coated filter paper. Vials were kept in a sealed container with a layer of Drierite at the bottom. Flies were (re-)hydrated flies in vials containing 1% agarose and a wet piece of sucrose-coated filter paper. After the appropriate water-deprivation period, flies were transferred into a T-maze and given the choice between two chambers lined with either a dried or a wet piece of filter paper. Preference Index was calculated as the number of flies in the wet tube minus the number of flies in the dry tube, divided by the total number of flies in each experiment.

### Brain dissociation and cell collection

Brains (0273-Gal4>mCherry) were dissected and dissociated as described.<sup>33</sup> Briefly, 24 central brains from an equal number of male and female flies were individually dissected in ice-cold DPBS (Gibco, 14190-086) and immediately transferred into 1 mL toxin-supplemented Schneider's medium (tSM: Gibco, 21720-001 + 50 mM d(-)-2-amino-5-phosphonovaleric acid, 20 mM 6,7-dinitroquinoxaline-2,3-dione and 0.1 mM tetrodotoxin) on ice. Brains were washed once with 1 mL tSM and incubated in tSM containing 1.11 mg/mL papain (Sigma, P4762) and 1.11 mg/mL collagenase I (Sigma, C2674). Brains were washed once more with tSM and subsequently triturated with flame-rounded 200 mL pipette tips. Dissociated brains were resuspended in 1 mL PBS + 0.01% BSA and filtered through a 10 mm CellTrix strainer (Sysmex, 04-0042-2314). Cell concentration was measured using a disposable Fuchs-Rosenthal haemocytometer (VWR, 631-1096) under a Leica DMIL LED Fluo microscope. A typical preparation from 24 brains yielded ~600,000 cells.

### Library preparation, sequencing, and processing

mRNA barcoding was performed using the Chromium Single Cell 3' Reagent Kit v3 (10x Genomics), following the manufacturer's instructions. For each sample, we targeted an 8,000 cell recovery. Two libraries were prepared for each condition (sated, 6h dehydrated, 12h dehydrated and 12h dehydrated + 45min rehydrated). Libraries were sequenced with NovaSeq 6000 (Illumina) at Oxford's Wellcome Trust Centre for Human Genetics. We obtained 3.419 billion reads, and used CellRanger 3.1.0 to map these to the FB2018\_06 *Drosophila melanogaster* genome assembly (v6.25),<sup>116</sup> and create digital gene expression (DGE) matrices.

### Filtering and doublet removal

Cell barcodes with <300 or >4,500 features, >20,000 UMIs, >15% mitochondrial RNA, >10% rRNA or >15% ribosomal proteins were discarded. DGE matrices were then merged by condition, normalized, and scaled using SCTransform in Seurat v3.<sup>124,125</sup> This included regression for the effects replicate and sex – based on expression of the male-specific lncRNA *roX1*.<sup>136</sup> DGE matrices were integrated using CCA anchor-based methods, and cells were clustered using the Louvain algorithm on the shared nearest neighbor graph with a resolution of 2 and an UMAP reduction performed for visualization, using the top 20 Principal Components (PCs). Doublets were removed using a hybrid method. First, DoubletFinder<sup>126</sup> was run on data processed with the standard Seurat scaling method (without SCTransform), as we found that DoubletFinder failed to produce reliable BCMvn curves on SCTransformed data. This identified 3,493 potential doublets. Second, because the glial marker *nrv2*<sup>137</sup> and markers for neurons releasing fast-acting neurotransmitters *VAcHT*, *VGlut* or *Gad1* are normally not co-expressed, we considered it parsimonious to classify "cells" expressing two or more of these genes as doublets. So as not to needlessly discard cells containing small contamination from these genes, we set thresholds of 3 (*nrv2*), 1.5 (*VAcHT*), 2.1 (*VGlut*) and 2.3 (*Gad1*), above which we considered these genes to be highly expressed. These values were estimated from the normalized and scaled expression levels as the local minima in each gene's bimodal distribution of non-zero values. We used the same principle to detect doublets in Kenyon Cells. We first identified Kenyon Cell clusters based

on expression of *Dop1R1*, *ey* and *mub*.<sup>33</sup> We then flagged all cells co-expressing markers for more than one Kenyon Cell subtype, namely *Ca-alpha1T* for  $\alpha\beta$ , *ab* for  $\gamma$  and *CG8641* for  $\alpha'\beta'$ ,<sup>33</sup> with thresholds of 1.5, 1.5 and 2.2, respectively (again estimated as the local minima in each gene's bimodal distribution of non-zero values in their normalized and scaled expression levels). Overall, this co-expression strategy identified another 2,828 doublets. Doublets were evenly spread across clusters, with only six clusters comprised of >20% doublets. All doublets identified with either of these two methods (9.05% of all cells) were removed prior to subsequent analyses (Figure S1A).

### Clustering

We developed a 4-step clustering pipeline with the aim of minimizing the number of PCs used for clustering and reducing the 'curse of high dimensionality' effects on nearest neighbor search.<sup>138,139</sup> After doublet removal, data was clustered using the Louvain algorithm with the first 20 PCs and a resolution of 2 and an UMAP plot constructed using the same PC dimensions for visualization. Then each cluster was assigned to one of six major cell types present in the *Drosophila* brain, using expression of the following markers: *VACHT* (cholinergic), *VGlut* (glutamatergic), *Gad1* (GABAergic), *ey*, *Dop1R2*, *Pka-C1*, *mub* (Kenyon Cells), *Vmat* (monoaminergic) and *CG10433* (glia & astrocytes),<sup>33</sup> with a seventh group containing non-assigned cells ("other"). Cells from each group were subsequently isolated. Data was normalized and scaled using SCTransform, and clustered and visualized on a UMAP plot, with 19, 17, 16, 12, 16, 14 and 12 PCs for each group, respectively. A resolution of 1 was used, except for the monoaminergic (4) and other (2) groups, with the aim of slightly over-clustering. Lastly, for each group a phylogenetic tree of all clusters was constructed in PCA space using Seurat's BuildClusterTree function. Clusters on neighboring branches with less than 10 protein-coding genes differently expressed between them (Wilcoxon signed-rank test, adjusted  $p < 0.05$ ) were fused.

### Annotation

Specific clusters were annotated based on the expression of the following known marker genes. Olfactory projections neurons (cholinergic): *acj6*, *ct*, *Lim1*,<sup>140–142</sup> ellipsoid body (EB) large-field ring neurons (GABAergic): *cv-c*, *Dh31*, *Octbeta2R*, *5-HT7*,<sup>143–146</sup> EB small-field ring neurons (GABAergic): *cv-c*, *Dh31*, *Octbeta2R*, not *5-HT7*, ventral and dorsal fan-shaped body (GABAergic): *cv-c*, *Dh31*, *sNPF*, not *Octbeta2R*,<sup>147</sup> medial fan-shaped body: *cv-c*, *Dh31*, not *sNPF*, not *Octbeta2R*, a/b Kenyon Cells: *sNPF*, *Eip93F*,<sup>33,148</sup> g Kenyon Cells: *sNPF*, *ab*,<sup>33</sup> a'/b' Kenyon Cells: *CG8641*,<sup>33</sup> dopaminergic neurons (monoaminergic): *ple*, *DAT*,<sup>149,150</sup> serotonergic neurons (monoaminergic): *SerT*, *Trh*,<sup>151,152</sup> octopaminergic neurons (monoaminergic): *Tdc2*, *Tbh*,<sup>153,154</sup> tyraminerbic neurons (monoaminergic): *Tdc2*, not *Tbh*, astrocytes: *AANAT1*, *alrm*, *Gat*, *e*,<sup>155–157</sup> surface glia: *Tret1-1*, *Mdr65*,<sup>32,158</sup> ensheathing glia: *zyd*, *trcl*,<sup>35,101</sup> cortex glia: *zyd*, *wrapper*.<sup>35</sup> Thresholds for each gene were set manually. Top markers for each cluster were calculated (Data S1).

### Differential expression (DE)

To account for zero-inflation triggered by dropout events and enable the use of DE tools initially created for analyzing bulk RNA-seq data, we generated cell-specific weights, using ZINB-WaVE.<sup>46,47</sup> Both DESeq2<sup>48</sup> and edgeR<sup>49,127</sup> were then used to calculate differential expression between pairs of conditions. Genes with  $|\log_2(\text{FC})| > 1$  and adjusted  $p$ -value  $< 0.05$  calculated with either method were considered to be differentially expressed.

### Pathway analysis

Gene Ontology Biological process over-representation test was performed for the differentially expressed genes shown in Figure 2E, using the Bioconductor package ClusterProfiler.<sup>128</sup> Significantly enriched GO terms based on  $p$ -values were then visualized as a chord diagram with GOplot.<sup>129</sup>

### RT-qPCR

Quantitative PCR experiments were performed as described.<sup>33</sup> In brief, total RNA was extracted from groups of 40 fly heads using the RNeasy Mini kit (Qiagen 74104). mRNA was then reverse-transcribed using the SuperScript III First-Strand Synthesis SuperMix (Invitrogen, 18080400) according to manufacturer's instructions. qPCR was performed in a Light-Cycler 480 Instrument II (Roche, 05015243001) using the Universal Probe Library system (UPL; Roche, 04683633001 and 04869877001). Each 10 mL reaction contained 2.4 mL of pre-amplified cDNA, 0.4 mM of each primer (designed with Roche Assay Design Center), 0.2 mM of UPL probe, and 5 mL LightCycler 480 Probes Master (Roche, 4887301001). Cycles were as follows: 95°C, 10'; 45x [95°C, 10'; 60°C, 30'; Fluorescence acquisition; 72°C, 1'].

### D-serine Feeding

For D-serine feeding 2.9 g/L or 27.6 mM of D-serine (S0033 Tokyo Chemical Industry) was mixed with 2% agarose and 5% sucrose. We used the same concentration of L-serine (S0035 Tokyo Chemical Industry). For control treated groups we used 2% agar and 5% sucrose.

### CAFE Assay

CAFE assay was performed as described<sup>57</sup> but adjusted for water consumption. Groups of 12 male flies were first dehydrated for 1 h in vials containing Drierite without indicator (ACROS Organics). Flies were then transferred to CAFE vials containing four glass capillaries loaded with 5  $\mu$ L of deionized water and  $\sim 0.1$   $\mu$ L of mineral oil. Vials were loaded into a tray covered with plastic wrap to reduce water loss due to evaporation. We also used 3 empty CAFE vials to assess the level of evaporation to subtract from the amount of

water consumed by the flies. Flies were kept in either 20°C or 30°C incubators. Food consumption CAFE used 5% yeast extract and 5% sucrose solution and 10 male flies per vial measuring consumption across 24 h. Vials also contained 10 mL of 1% agarose. We kept track of the number of deaths for each vial and re-adjusted consumption values based on the number of flies alive by the conclusion of the assay. Water and food consumption in  $\mu\text{L}$  is recorded as total water consumption of 12 flies minus the average evaporation volume from the empty vials.

D-serine preference CAFE involved storing groups of 8 male flies per vial at 30°C for 18–20 h prior to the start of the assay. We then transferred the flies into CAFE preference vials containing two capillary tubes loaded with normal 5% yeast extract and 5% sucrose and two capillary tubes loaded with 2.9 g/L (27.6 mM) of D-serine (S0033 Tokyo Chemical Industry) with 5% yeast extract and 5% sucrose. Vials also contained 10 mL of 1% agarose. Flies were then given 24 h to feed then were removed. D-serine Preference Index was calculated as the volume of D-serine food minus volume of normal food divided by the total volume of food consumed.

### Manual Feeding Assay

The water feeding assay was performed as described<sup>19</sup> with minor adjustments. Flies were briefly anesthetized on ice and fixed to a glass slide using beeswax. The slide was then transferred to an empty pipette tip box containing Drierite without indicator (ACROS Organics), closed, then wrapped with parafilm at the seam. For experiments performed at 30°C we put the flies in an incubator for the 2 h dehydration step then performed the experiment in a temperature (30°C) and humidity-controlled (60–65%) booth. The flies were hand fed with a syringe containing deionized water. If the experiments were performed at 30°C the water was warmed to minimize temperature changes in the fly during feeding. We presented the water 10 times to each fly and measured cumulative time spent drinking the water. Presentations were made such that we briefly touched the fly's legs with the water. Flies were excluded if they exhibited little to no movement when touched on their abdomen with the needle. For NMDAR single-site mutant flies we used a 2.5 h dehydration step instead of 2 h as the background Canton-S strain from the Atkinson lab (UT, Austin) showed greater dehydration resistance than Canton-S strain of the Waddell lab.

### Hygrosensation/Water memory in the T-maze

We used 3–5 day old flies to assess hygrosensation in the water T-maze, as described.<sup>39</sup> Briefly, 24 h prior to testing we group housed  $\sim 100$  flies per vial on standard commel/agar food and a 20x60 mm piece of filter paper. If flies were water deprived, they were housed in vials containing desiccant for 2 h before testing. Testing was performed in a temperature (30°C) and humidity-controlled (60–65%) booth. Flies were loaded into a T-maze and given a 2 min choice between an arm containing wet filter paper or dry filter paper. Preference Index was calculated as the number of flies in the wet arm minus the number in the dry arm, divided by the total number of flies.

For water memory assays we used 3–5 day old flies. Prior to training, flies were water deprived for 16–17 h in vials containing desiccant. Water-deprived flies were trained to associate odor with water reward<sup>159</sup> then were immediately transferred to vials containing 1% agarose (as a water source) supplemented with nothing, D-serine, or L-serine, 29 g/L (276mM). They were then housed for an additional 23 h in vials containing dry sucrose, dry sucrose and D-serine, or dry sucrose and L-serine, before being tested in the T-maze for water memory performance.

### Two-Photon Calcium Imaging

Imaging experiments were performed using 3–7 day old flies as described previously.<sup>160,161</sup> Briefly, flies were immobilized by cooling on ice and mounted in a custom-built chamber to allow free movement of their legs. For control conditions we used an external saline containing 103 mM NaCl, 3 mM KCl, 5 mM N-Tris, 10 mM trehalose, 10 mM glucose, 7 mM sucrose, 26 mM NaHCO<sub>3</sub>, 1 mM NaH<sub>2</sub>PO<sub>4</sub>, 1.5 mM CaCl<sub>2</sub>, 4 mM MgCl<sub>2</sub>, osmolarity 275 mOsm, pH 7.3. The head capsule was opened under room temperature carbogenated (95% O<sub>2</sub>, 5% CO<sub>2</sub>) external saline. The mounted fly was placed under the two-photon microscope (Scientifica). We used a Ti-Sapphire laser (Chameleon Ultra II, Coherent) to excite fluorescence using 140 fs pulses with 80 MHz repetition rate at 910 nm. We acquired 256 x 256 pixel images at 5.92 Hz controlled by ScanImage 3.8 software.<sup>130</sup>

For analysis, the two-photon images were manually segmented using Fiji.<sup>131</sup> With a custom Fiji script we measured the average baseline fluorescence ( $F_0$ ) for 14 s prior to each drug treatment or stimulus delivery.  $F/F_0$  describes the fluorescence relative to the baseline. For drug delivery treatments we defined the “Pre-” treatment as the average  $F/F_0$  value for 14 s prior to the drug delivery and the “Post-” treatment as the average  $F/F_0$  in the 25 s from onset of drug delivery to the offset. To account for inter-cell baseline differences in  $F/F_0$  we normalized the “Pre-” treatment to equal 0 for each cell. For area under the curve (AUC) calculation we measured the approximated integral of  $F/F_0$  during the drug treatment (“During”) as well as after the treatment until the recording ended (“After”). To account for variance between individual cells, we normalized the beginning of the trace starting from the onset of drug delivery to equal 0 for each cell. For odor delivery AUC analysis we measured the  $F/F_0$  during the 5s odor presentation.

To image fly brains following desiccation or starvation, we starved and water deprived flies for 8–10 h prior to recordings. All recordings were performed between ZT 2–6 and deprived flies at ZT 18–22. Dehydration was performed as above.

### Solutions

For acute drug application, we used a perfusion pump system (Fisher Scientific US 14-284-201) to continuously deliver saline at a rate of  $\sim 0.043$  mL/sec. All drugs were applied with in the presence of 1  $\mu\text{M}$  tetrodotoxin (TTX) to block voltage-gated sodium channels and propagation of action potentials.

### NR1+ neuron and astrocyte recordings

Recordings of NR1+ neurons (*nmdar1-K1GAL4>GCaMP7f*) were performed using either 4 mM  $Mg^{2+}$  or 0 mM  $Mg^{2+}$  saline. To compensate for the change in osmolarity with  $Mg^{2+}$  free saline, we added 1.5 mM  $CaCl_2$  and 2.5 mM NaCl. We used 20 mM N-methyl-D-aspartic acid (Sigma-Aldrich M3262), D-serine (Tokyo Chemical Industry - S0033), L-serine (Tokyo Chemical Industry - S0035), and glycine (Sigma-Aldrich G8898). Drug mixtures were maintained at room temperature prior to application. Before recordings we pre-loaded the pump with 1 mL of saline then 1 mL of drug mixture and allowed the pump to run continuously throughout the recording so there were no discontinuities in flow during recording. We flushed the pump for 5 min with saline between each drug application. When multiple drug treatments were performed the application order was randomized for each animal to account for sensitization/desensitization effects. To block NMDARs, we applied 15 mM ketamine with NMDA, D-serine, and TTX.

Astrocyte recordings (*R86E01-GAL4>GCaMP7f*) were performed using normal external saline, hyperosmotic 320 mOsm saline,<sup>19</sup> and sugar free saline.<sup>95</sup> Hyperosmotic saline was made by adjusting the total amount of added solute in our original saline recipe, while maintaining the same ratios, so that the osmolarity was increased to 320 mOsm. We applied 10 mM acetylcholine (Sigma-Aldrich A6625), 10 mM ATP (Sigma-Aldrich A2383), 10 mM glutamate (Sigma-Aldrich G0355000), or 10 mM adenosine (Sigma-Aldrich A9251) with 1  $\mu$ M TTX (Sigma-Aldrich T3194). When multiple drug treatments were performed the application order was randomized for each animal.

For MBON- $\gamma$ 5 $\beta$ '2a (M6) recordings (*R66C08-GAL4>GCaMP7f*), flies were exposed to a constant air stream containing mineral oil solvent (air). Flies were sequentially exposed to 3-octanol (OCT) and 4-methylcyclohexanol (MCH) for 5 s with 30 s inter-odor interval. To measure dendritic responses of MBON- $\gamma$ 5 $\beta$ '2a signals were simultaneously acquired from both hemispheres and average responses were analyzed.

For tetanus toxin (TetX) application, we replaced the bath saline with saline containing 1  $\mu$ M TetX and incubated the flies for 1 h at room temperature. Halfway through the incubation the bath solution was mixed 4X by pipetting.

For  $\alpha$ , $\beta$ -methylene adenosine 5'-diphosphate (AMPCP) (Sigma-Aldrich M3763) application we incubated the flies with 100  $\mu$ M AMPCP in normal saline for at least 30 min. Flies were then imaged using saline containing AMPCP and ATP.

### Identification of astrocytes in EM reconstructions

We used FlyWire ([www.flywire.ai](http://www.flywire.ai))<sup>84</sup> to construct the morphology of astrocytes in the Full Adult Female Brain (FAFB) transmission electron microscope (TEM) dataset.<sup>85</sup> Astrocytes were identified and distinguished from other glia in the raw EM data by first following cell processes that cross the ensheathing glial boundary, and following them to find their cell body. Astrocytic morphology is characteristically distinct from that of neuronal soma tracts, and ensheathing or cortex glia.

In FlyWire, 3D meshes from automatic A.I. based<sup>162</sup> reconstructions of neurons and glia are readily available, but manual expert review is required to add missing, or remove extraneous, branches. Following revision neurons and glial cells had no false continuations, by standard criteria that are previously described.<sup>84,163,164</sup> In brief, an expert reviewer (>1000 h experience) first inspected the astrocytes for false continuations, and obvious missing branches. Then a methodical visual inspection of all branches with neuroglancer<sup>84</sup> allowed the user to identify and correct further smaller errors. A second expert reviewer then performed the same review to generate a consensus. In this study, 4 astrocytes were submitted for extensive review to two experienced reviewers following every process section by section from the tip inward toward. This review process only resulted in the correction of a few smaller branches with no more than 2 connections each.

### Classification of astrocytic processes

Tripartite synapses (TPS) contain presynaptic, postsynaptic, and astrocytic process, with all compartments making direct contact with the synaptic cleft. We found that astrocytic processes sometimes also cover a large part of the perimeter of a presynaptic bouton without contacting the synaptic cleft – a motif we classified as ‘engulfing’. Lastly astrocytic processes were often also found to contact the post-synaptic neuron below the synaptic cleft (within 500 nm of a presynaptic terminal). These contacts to post-synaptic neurons were not included in the TPS analyses.

### Analysis of astrocyte-neuronal type relationship

3D meshes of cells in FlyWire, information about synapses with pre and postsynaptic partners,<sup>165</sup> and neurotransmitter predictions<sup>88</sup> were downloaded with the CAVEclient ([github.com/seung-lab/CAVEclient](https://github.com/seung-lab/CAVEclient)) and further analysed using functionalities from FAFBseg v.1.4 (<https://github.com/navis-org/fafbseg-py>) and Navis v.0.6 (<https://github.com/navis-org/navis>) and custom scripts (available upon request). Synapses with CleftScore  $\geq 50$  and ConnectionScore  $\geq 33$ <sup>165</sup> were considered for analyses, after thresholds were manually reviewed in a sample of 500. Synapses were classified as TPS, when an astrocyte was found as a postsynaptic partner to a neuronal presynapse.

To determine the vicinity profile of an astrocyte, its mesh was obtained and skeletonised with trimesh v.3.9.32 (<https://github.com/mikedh/trimesh>) and Skeletor 1.1.<sup>132</sup>

To exclude somata and main branches we only considered nodes with a radius of < 300 nm. To generate the vicinity profile, synapses within a 2  $\mu$ m bounding box around the nodes were filtered for the above criteria and classified by neurotransmitter usage. Then the histogram of distances between the nodes and synapses of each neurotransmitter was generated and gaussian kernel density estimates and bootstrap samples of the means of the distance distributions computed with Python base functions for statistical analyses (Code available on request).

### 3D representations

3D representations and animations of astrocytes were created with Blender 3.0 (Blender Community, 2018) from meshes obtained from Flywire, via CAVEclient and neuroglancer within Flywire.

## QUANTIFICATION AND STATISTICAL ANALYSIS

### Single-cell transcriptomics

Statistical methods employed for single-cell analysis are described above. In brief, Wilcoxon signed-rank test was used for marker analysis and cluster annotation. For differential expression, the Wald test implemented in DESeq2 and the binomial generalized log-linear model implemented in edgeR's *glmWeightedF* function were used. For these tests, N represents the number of cells in relevant clusters, and significance was defined using an adjusted p-value < 0.05 after Benjamini-Hochberg correction. When relevant, details are found in the figure legends.

### Behavioral Statistical Analysis

All behavioral data was analyzed using Prism GraphPad software. Data were analyzed for normality using the Shapiro-Wilk test. Depending on normality we used a one-way ANOVA with Dunnett's multiple comparisons or Kruskal-Wallis ANOVA with Dunn's multiple comparisons. Details on statistical analyses and the N for each experiment can be found in the figure legends. Significance was defined using an alpha < 0.05.

### Two-Photon Calcium Imaging Analysis

For analysis, the two-photon images were manually segmented using Fiji and analyzed using a custom MATLAB script.<sup>131</sup> With a custom Fiji script we measured the average baseline fluorescence ( $F_0$ ) for 14 s prior to each drug treatment or stimulus delivery.  $F/F_0$  describes the fluorescence relative to the baseline. For drug delivery treatments we defined the "Pre-" treatment as the average  $F/F_0$  value for 14 s prior to the drug delivery and the "Post-" treatment as the average  $F/F_0$  in the 25 s from onset of drug delivery to the offset. To account for inter-cell baseline differences in  $F/F_0$  we normalized the "Pre-" treatment to equal 0 for each cell. For area under the curve (AUC) calculation we measured the approximated integral of  $F/F_0$  during the drug treatment ("During") as well as after the treatment until the recording ended ("After"). To account for variance between individual cells, we normalized the beginning of the trace starting from the onset of drug delivery to equal 0 for each cell. For odor delivery AUC analysis we measured the  $F/F_0$  during the 5s odor presentation.

Data were analyzed for normality using the Shapiro-Wilk test. Depending on normality we used a one-way ANOVA with Dunnett's multiple comparisons or Kruskal-Wallis ANOVA with Dunn's multiple comparisons. Details on statistical analyses and the N for each experiment can be found in the figure legends. Significance was defined using an alpha < 0.05. For categorical data statistical significance was determined using a chi-square test.

### Analysis of astrocyte-neuronal type relationship

3D meshes of cells in FlyWire, information about synapses with pre and postsynaptic partners,<sup>165</sup> and neurotransmitter predictions<sup>88</sup> were downloaded with the CAVEclient ([github.com/seung-lab/CAVEclient](https://github.com/seung-lab/CAVEclient)) and further analysed using functionalities from FAFBseg v.1.4 (<https://github.com/navis-org/fafbseg-py>) and Navis v.0.6 (<https://github.com/navis-org/navis>) and custom scripts (available upon request).

Synapses with CleftScore  $\geq 50$  and ConnectionScore  $\geq 33$ <sup>165</sup> were considered for analyses, after thresholds were manually reviewed in a sample of 500. Synapses were classified as TPS, when an astrocyte was found as a postsynaptic partner to a neuronal presynapse.

To determine the vicinity profile of an astrocyte, its mesh was obtained and skeletonised with trimesh v.3.9.32 (<https://github.com/mikedh/trimesh>) and Skeletor 1.1.<sup>132</sup>

To exclude somata and main branches we only considered nodes with a radius < 300 nm. To generate the vicinity profile, synapses within a 2  $\mu$ m bounding box around the nodes were filtered for the above criteria and classified by neurotransmitter usage. Then histograms of distances between the nodes and synapses of each neurotransmitter were generated. For shortest distances between all astrocytes and synapses of specific neurotransmitters probability densities and their functions from gaussian kernel density estimates were created for data representation in Figure 5J (matplotlib.pyplot.hist(density = True); scipy.stats.gaussian\_kde(), with bandwidth method = Scott's rule (default) and equal weighting). For testing of statistical significance the distributions of means from 10000 samples of the shortest distances between all astrocytes and synapses using specific neurotransmitters obtained via bootstrapping (numpy.random.choice() for the all 3 astrocytes and all synapses) (shown in Figure S5N) were tested by a two sided Welch's t-test assuming non equal variance (scipy.stats.ttest\_ind(equal\_var = False)) significance was determined when p < 0.05 (Code available on request).

**Current Biology, Volume 32**

## **Supplemental Information**

### **Gliotransmission of D-serine promotes thirst-directed behaviors in *Drosophila***

**Annie Park, Vincent Croset, Nils Otto, Devika Agarwal, Christoph D. Treiber, Eleonora Meschi, David Sims, and Scott Waddell**

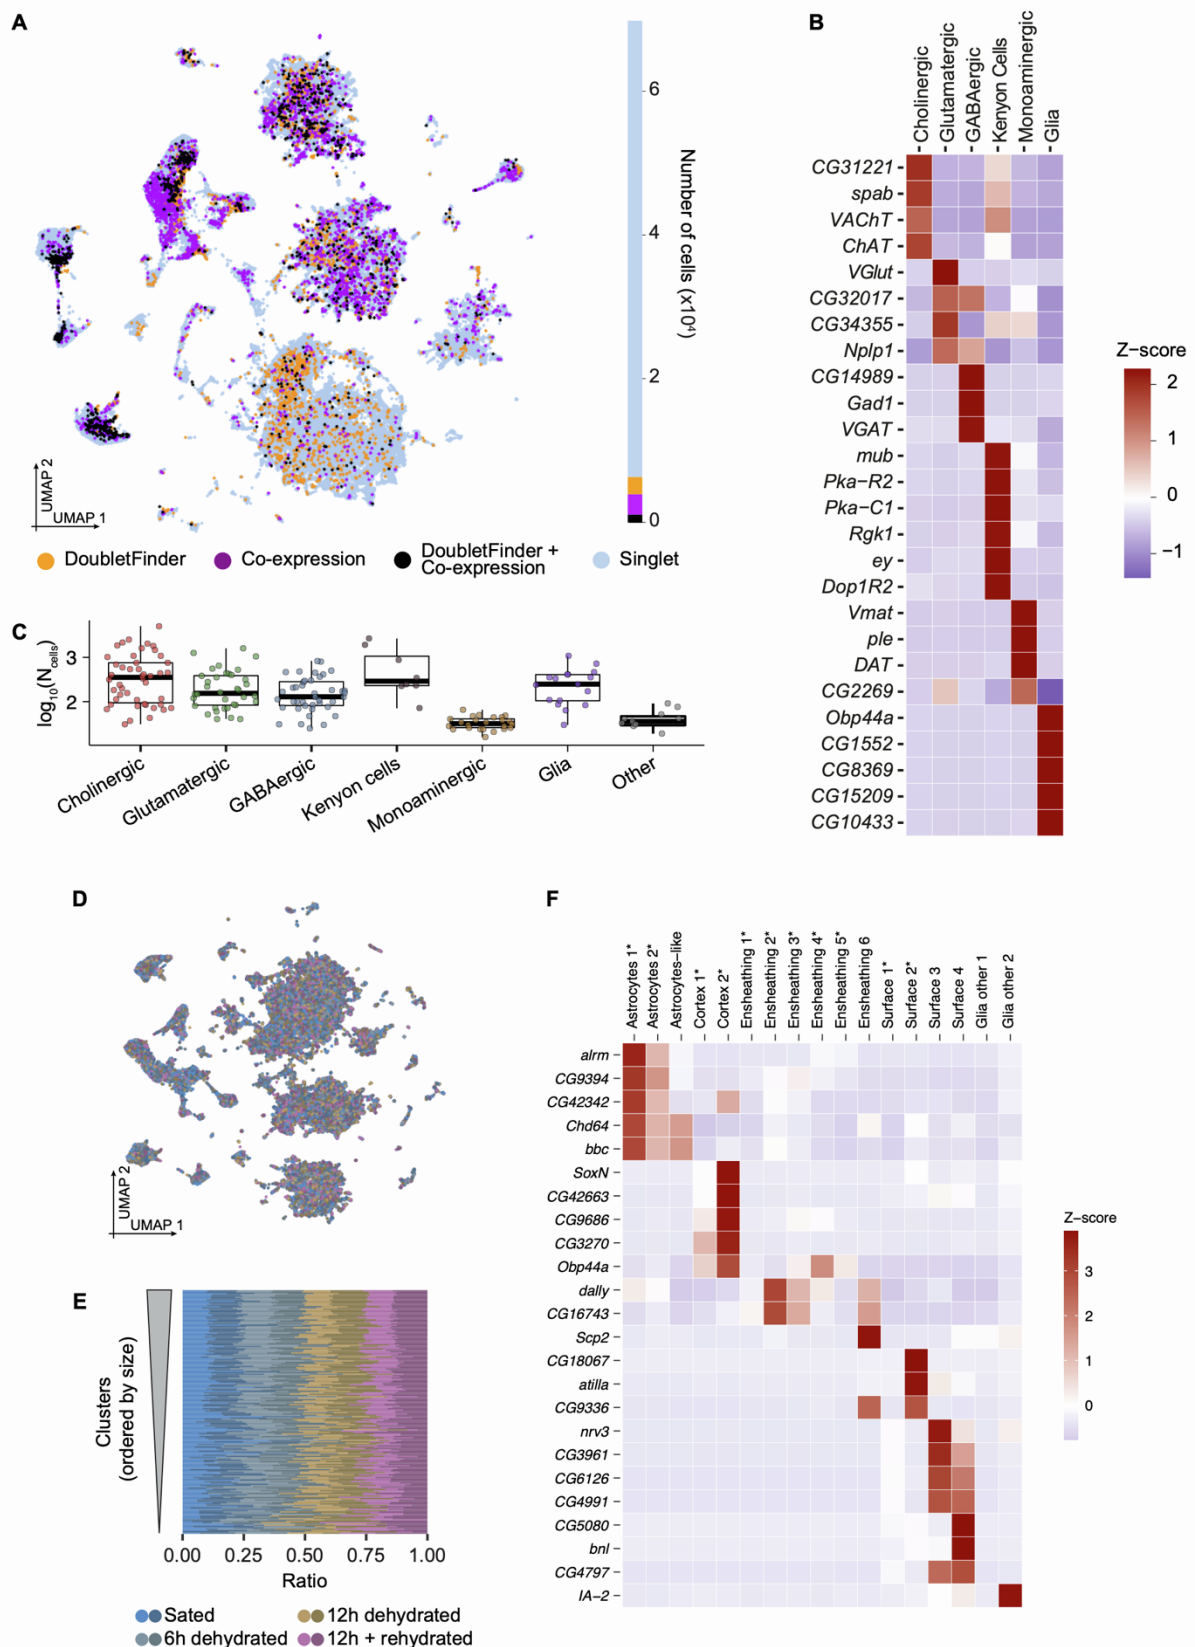

**Figure S1. Filtering and clustering single-cell transcriptomics data, Related to Figure 1.**  
**(A)** Left: UMAP plot obtained after initial clustering, showing doublets identified with DoubletFinder or the co-expression strategy. Right: barplot showing the number of cells

labelled with either method and that were discarded prior to subsequent analyses. **(B)** Heatmap showing expression of the top marker genes from six of the main cell classes. **(C)** Number of cells per cluster, grouped by main cell classes. **(D)** Same UMAP plot as Figure 1E, with colors representing the experimental sample from which each cell originates. **(E)** Ratio of cells originating from each sample, for each cluster, ordered by size. All clusters contain cells from each condition and sample. As expected, more variability was evident in the small clusters. **(F)** Heatmap showing expression of the top marker genes from each glia cluster.

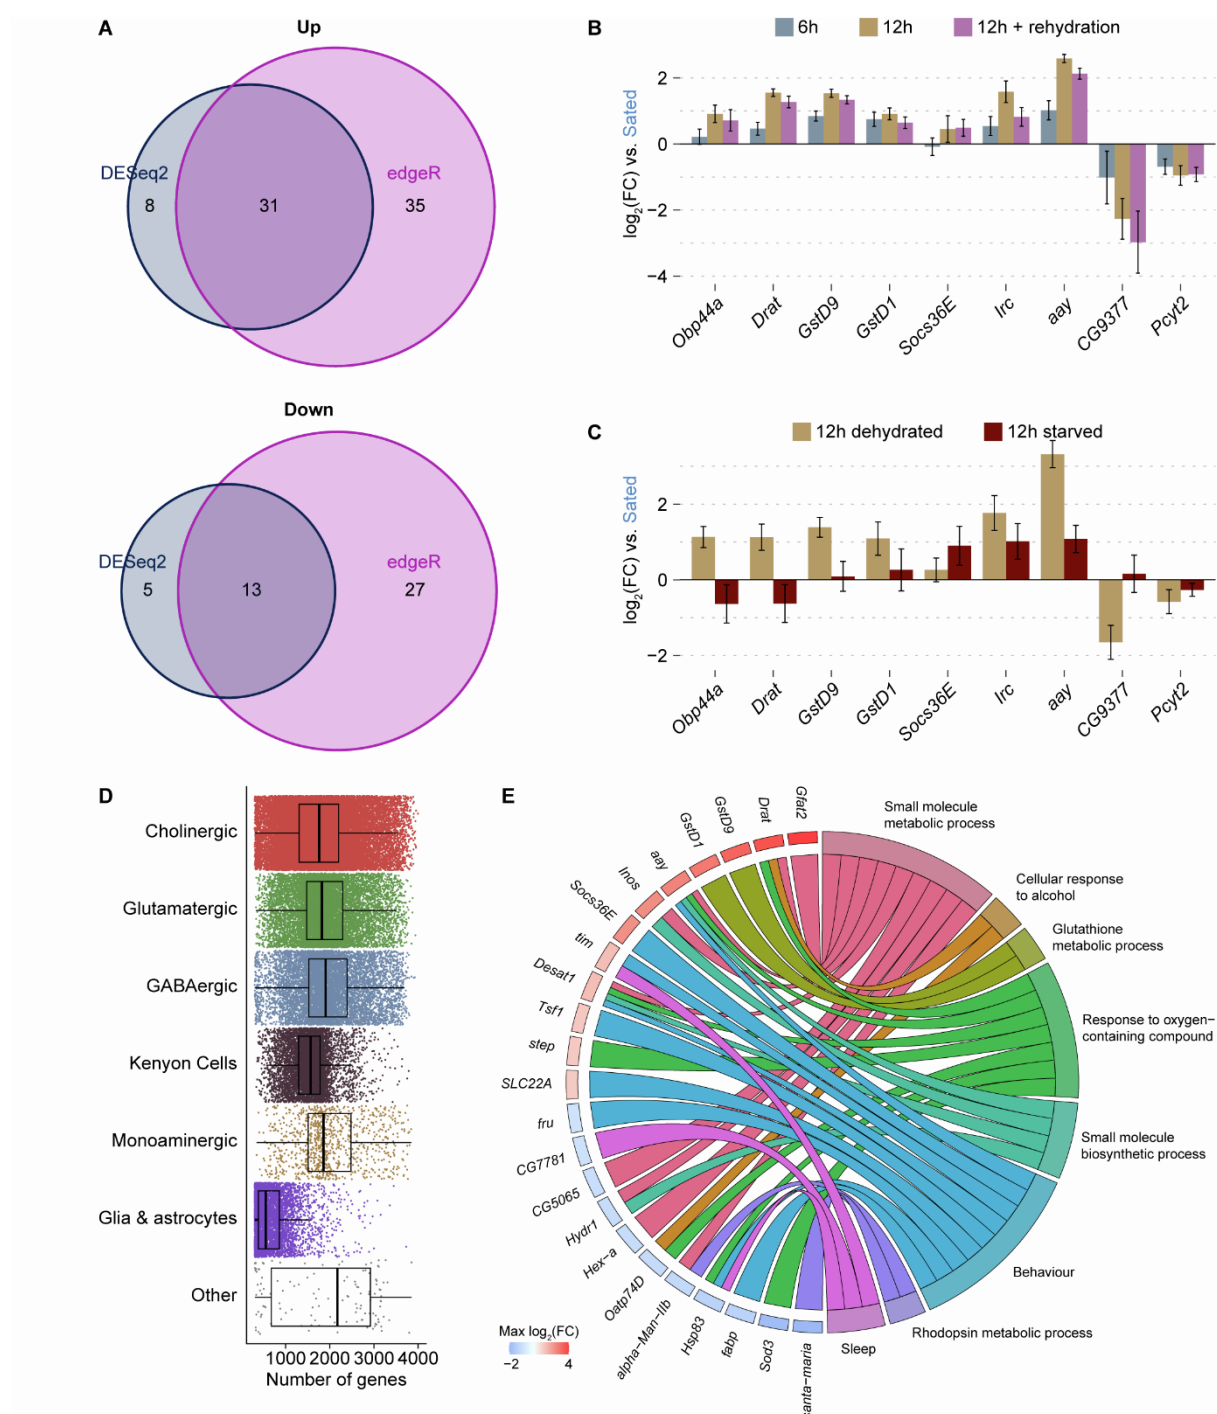

**Figure S2. Differential gene expression in thirsty flies, Related to Figure 2.**

(A) Venn diagrams showing the number of gene expression events identified with DESeq2, edgeR, or both methods. Top: up-regulated genes. Bottom: down-regulated genes. (B) Relative expression changes for a selection of differentially expressed genes in thirsty flies. Groups are those as in Figure 1B, and values are relative to those in sated flies. Data are from RT-qPCR of whole heads, n2-3. (C) Relative expression changes for a selection of genes that

were differentially expressed in thirsty flies, in a 12h dehydrated and 12 h starved condition, relative to levels in sated animals. RT-qPCR on whole heads, n = 2-3. **(D)** Number of genes detected in each cell, grouped by main class. **(E)** Chord diagram showing the most represented GO categories across the genes that are differently expressed in glia of thirsty flies.

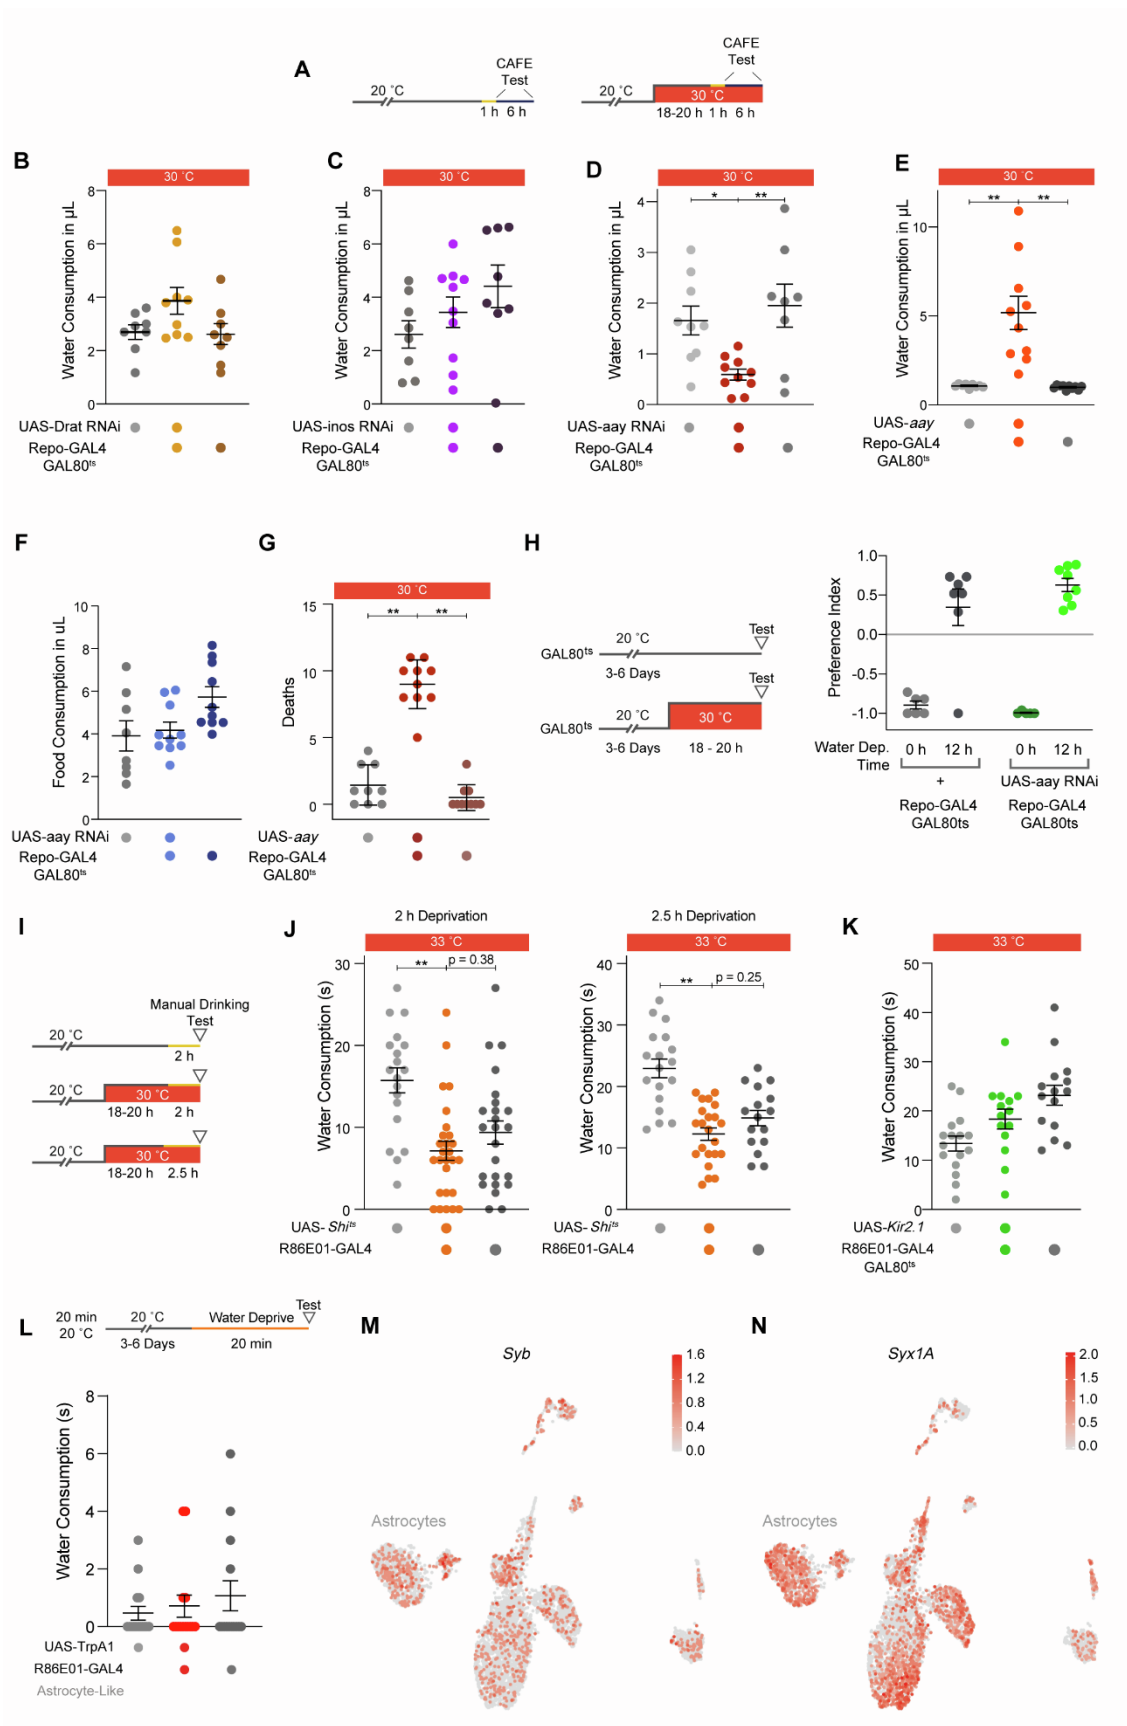

**Figure S3. Extra water consumption and water preference data, Related to Figure 3.**

(A) CAFE water consumption assay protocol. Orange section of black line indicates period when flies are water deprived. (B) Knockdown of *Drat* in glia does not change water consumption in CAFE. (C) Knockdown of *inos* in glia does not alter water consumption in CAFE. (D) Knockdown of *aay* in glia reduces water consumption in CAFE. (E) Overexpression of *aay* in glia increases water consumption in CAFE. (F) Knockdown of *aay* does not alter food consumption as measured in CAFE. (G) Number of deaths per vial of 12 flies from S1D during CAFE assay shows overexpression of *aay* makes flies more susceptible to water deprivation. (H) Flies with *aay*-knockdown in glia exhibit normal hygrosensation in the T-maze. Flies show normal innate avoidance of high humidity when water sated, and display normal water seeking when water deprived. (I) Temperature regimen for inhibiting astrocyte vesicle release with expression temperature sensitive *Shibire*<sup>ts</sup> while measuring water consumption. (J) *Shibire*<sup>ts</sup> expression in astrocytes does not significantly suppress water consumption, relative to controls. (K) Overexpressing the inward-rectifying potassium channel Kir2.1 in astrocytes did not significantly change water consumption. (L) Permissive temperature control for *R86E01>TrpA1* activation experiments (Figure show that flies that do not have activated astrocytes do not increase water consumption (n = 14, 15 flies). (M) UMAP plot showing expression levels of *Syb* across glial clusters. Scale represents normalized expression levels. Refer to Figure 1F for annotations. (N) UMAP plot showing expression levels of *Syx1A* across glial clusters. Scale represents normalized expression levels. Refer to Figure 1F for annotations. For panels B-H and J-K, normality was assessed using the Shapiro-Wilk test. \* p<0.05, \*\* p<0.01, Ordinary one-way ANOVA with Dunnett's multiple comparisons test, unless otherwise stated. Data are mean +/- SEM.

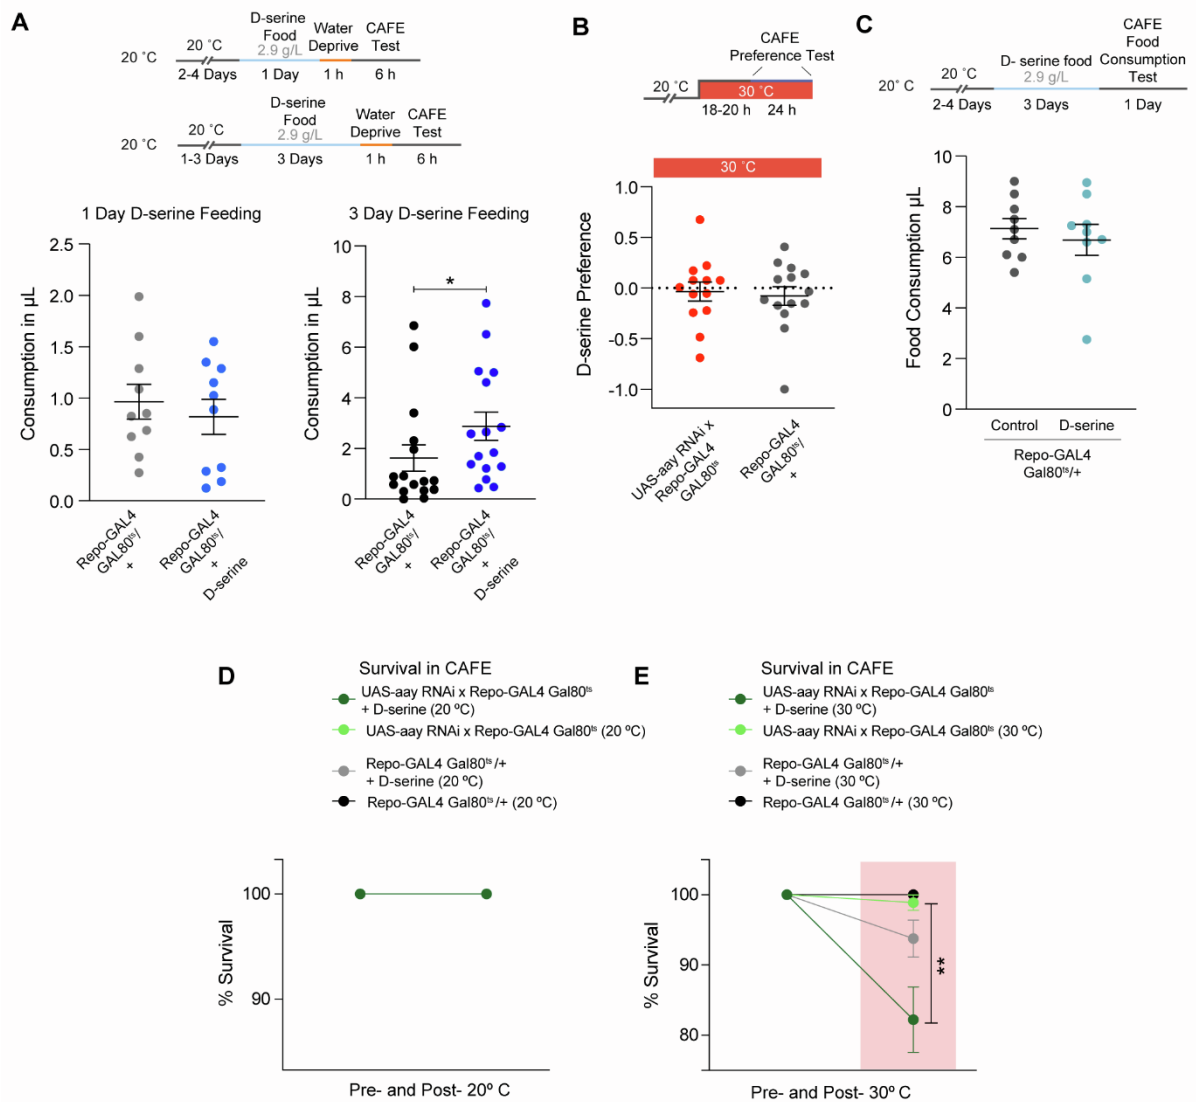

**Figure S4. Effects of D-serine feeding and D-serine preference, Related to Figure 4.**

(A) Protocol for D-serine feeding and testing in the CAFE assay and results from 1 and 3 days of D-serine feeding. Only 3 days of D-serine feeding significantly increased water consumption. \*  $p < 0.05$  two-tailed Mann-Whitney test ( $n_{1\text{-day}} = 10$  vials,  $n_{3\text{-days}} = 16$  vials). (B) Neither *aay*-knockdown or *GAL4/GAL80<sup>ts</sup>* control flies show a preference for D-serine containing food in CAFE ( $n = 13, 14$  vials). (C) D-serine feeding does not change food consumption in the CAFE ( $n = 9$  vials). (D) Survival of *aay*-knockdown flies in CAFE at permissive 20°C (no induction of *aay*-RNAi expression) that were either fed D-serine or kept on 'D-serine free' food. Flies survived throughout the assay ( $n = 8, 9$  vials). (E) Survival of *aay*-knockdown flies in CAFE with a 30°C heat step (induced *aay*-RNAi expression). Flies with *aay* knockdown that were also fed D-serine show significantly compromised survival in CAFE ( $n = 8, 9$  vials). \*\*  $p < 0.01$  *aay*-RNAi vs. *aay*-RNAi + D-serine. Normality was assessed using the

Shapiro-Wilk test. \*  $p < 0.05$ , \*\*  $p < 0.01$ , \*\*\*  $p < 0.001$ , \*\*\*\*  $p < 0.0001$  Ordinary one-way ANOVA with Dunnett's multiple comparisons test, unless otherwise stated. Data are mean  $\pm$  SEM.

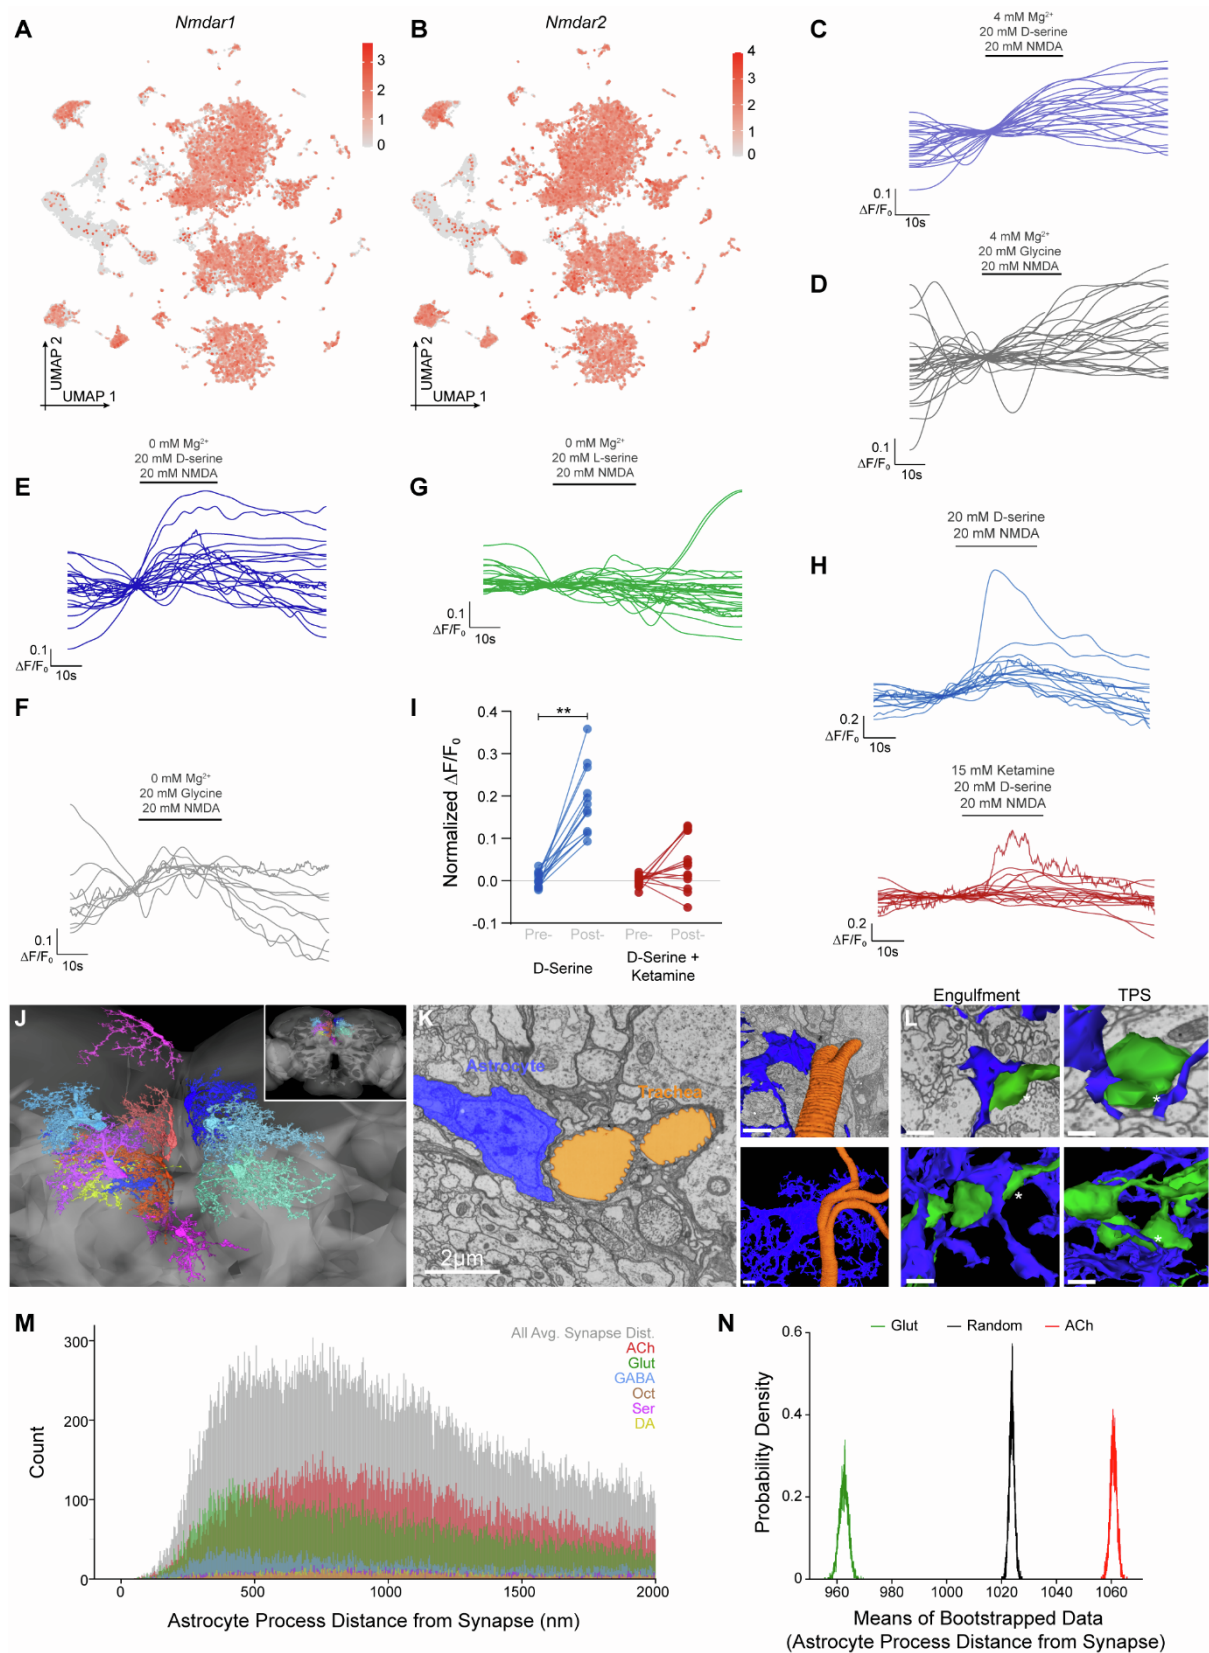

**Figure S5. D-serine is a co-agonist for NMDARs, Related to Figure 5**

(A) UMAP plot showing expression levels of *Nmdar1* across glial clusters. Scale represents normalized expression levels. Refer to Figure 1E for annotations. (B) UMAP plot showing

expression levels of *Nmdar2* across glia clusters. Scale represents normalized expression levels. Refer to Figure 1E for annotations. **(C)** Individual  $\Delta F/F_0$  GCaMP7f traces of NR1-expressing neurons to D-serine and NMDA application in high  $Mg^{2+}$ . **(D)** Individual traces of NR1 neurons to glycine and NMDA application in high  $Mg^{2+}$ . **(E)** Individual traces of NR1 neurons to D-serine and NMDA application in 0 mM  $Mg^{2+}$ . **(F)** Individual traces of NR1 neurons to glycine and NMDA application in 0 mM  $Mg^{2+}$ . **(G)** Individual traces of NR1 neurons to L-serine and NMDA application in 0 mM  $Mg^{2+}$ . **(H)** Individual traces of NR1 neuron responses to D-serine and NMDA application, with and without ketamine. **(I)** quantification of Pre- and post-responses of Figure 5H with outliers removed. \*\*  $p < 0.01$ , Kruskal-Wallis ANOVA with Dunn's multiple comparisons test. **(J)** 3D representation of 11 reviewed astrocytes with processes in the SMP. Brain neuropil is grey background. Astrocyte somata reside at the neuropil boundary and their processes are mostly mutually exclusive to one area of the neuropil. Few astrocyte processes venture past ensheathing glial boundaries. Inset shows lesser zoom for position of reference within the entire brain. **(K)** Astrocyte cell bodies are often close to trachea. Left: Greyscale EM data with a glial soma (blue) and two tracheal branches (orange). Upper right: Same greyscale image with 3D reconstructions of astrocyte cell body and trachea superimposed. Lower right: 3D renderings show the astrocyte in relation to trachea. **(L)** Same EM section as Figure 5I with superimposed 3D reconstruction of neuronal boutons and astrocytic processes engulfing a bouton (top left) and contributing to a tripartite synapse (TPS) (top right). Bottom left: 3D renderings show astrocytic processes engulf the synaptic bouton near the synapse (asterisk). Bottom right: 3D reconstructions show 3 boutons are contacted by thin astrocytic processes. Location of synapse from Fig 5I indicated (asterisk). Scale bars 300nm. See also Video S1. **(M)** Astrocytic processes are closer to glutamatergic synapses, than GABAergic and cholinergic synapses. This is shown in a vicinity profile for SMP astrocytes consisting of histograms of the distribution of distances between synapses and fine astrocytic processes (less than 300nm radius), sorted by predicted neurotransmitter type. Note: Engulfment happens typically within 500nm of synapses and astrocytes often also contact postsynaptic processes more distant from the synapse. **(N)** Astrocytes are significantly closer to glutamatergic than cholinergic synapses. Means of 10000 bootstrap samples taken from the probability distributions of distances between synapses and glial processes of the SMP astrocytes. Only glutamatergic and cholinergic synapses in the vicinity of fine astrocytic processes (2 $\mu$ m radius around processes with radius  $\leq$  300nm) are displayed together with random draws from both sets. All 3 distributions are significantly different from each other. Heteroscedastic t-test:  $p = 0$  (Glut  $\leftrightarrow$  Random) and  $p = 10^{-200}$  (ACh  $\leftrightarrow$  Random).

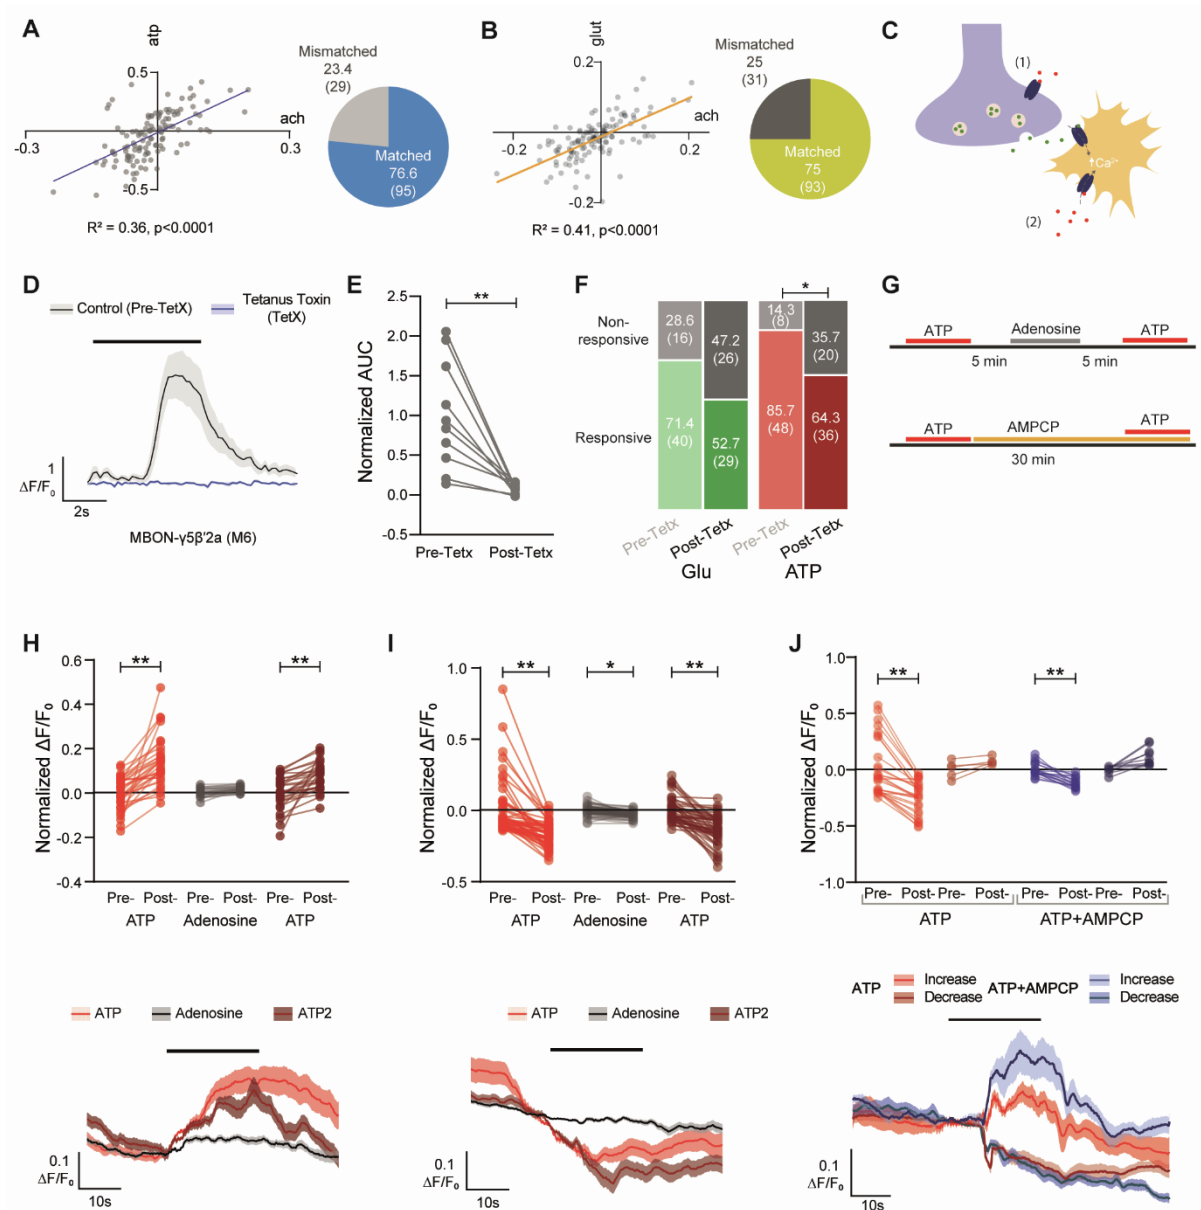

**Figure S6. Specificity of astrocytic responses to neurotransmitters, Related to Figure 6**

(A) Astrocytes show matched responses to ATP and ACh application.  $\Delta F/F_0$  responses for ACh plotted against ATP responses with linear regression. Pie chart shows number of astrocytes with matched and mismatched responses between ACh and ATP. Fisher's exact test matched vs. mismatched,  $p = 1.076 \times 10^{-5}$  OR = 3.28. (B) Astrocytes show matched responses to glutamate and ACh application.  $\Delta F/F_0$  responses for glutamate plotted against ACh responses with linear regression. Pie chart shows number of astrocytes with matched and mismatched responses between glutamate and ACh. Fisher's exact test matched vs. mismatched,  $p = 2.27 \times 10^{-6}$  OR = 3.72. (C) Schematic of two possible mechanisms for differential astrocytic responses with experimental procedure. 1) Exogenously applied neurotransmitter (red dots) acts on pre-synaptic or any non-astrocytic compartment that drives

release of a secondary neurotransmitter (green dots, which then drives changes in astrocytic  $\text{Ca}^{2+}$ . 2) Exogenously applied neurotransmitter (red dots) acts directly on the astrocytes modulating  $\text{Ca}^{2+}$  levels. Co-applying tetanus toxin with exogenous neurotransmitter application should prevent mechanism 1) from occurring. **(D)** 1 h of 1 $\mu\text{M}$  Tetanus toxin (TetX) application is sufficient to suppress polysynaptic activity. Odor exposure (black bar) to the fly activates MBON- $\gamma 5\beta'2a$  (M6). Tetx suppresses odor-induced activity recorded in the  $\beta'2a$  region of the MBON- $\gamma 5\beta'2a$  dendrite. **(E)** Area Under the Curve (AUC) analysis of  $\beta'2a$  dendritic field before and after Tetx application shows elimination of odor-induced  $\text{Ca}^{2+}$  response. \*\*  $p < 0.01$  paired t-test. **(F)** Most glutamate and ATP responsive astrocytes retain their neurotransmitter sensitivity following Tetx application. Tetx application reduced the number of ATP sensitive astrocytes and modestly reduced glutamate responsive astrocytes ( $p = 0.066$ ). \*  $p < 0.05$  Fisher's exact test with Bonferroni correction. **(G)** Protocol for ATP and adenosine application, and ATP with AMPCP. **(H)** Astrocytes show excitatory responses to ATP but not to adenosine. \*\*  $p < 0.01$ , Kruskal-Wallis ANOVA with Dunn's multiple comparisons test. **(I)** Astrocytes show inhibitory responses to ATP and adenosine. \*  $p < 0.05$ , \*\*  $p < 0.01$ , Kruskal-Wallis ANOVA with Dunn's multiple comparisons test. **(J)** Inhibiting ATP degradation by blocking ecto-5'-nucleotidase/CD73 with AMPCP does not abrogate ATP responses \*\*  $p < 0.01$ , Kruskal-Wallis ANOVA with Dunn's multiple comparisons test.

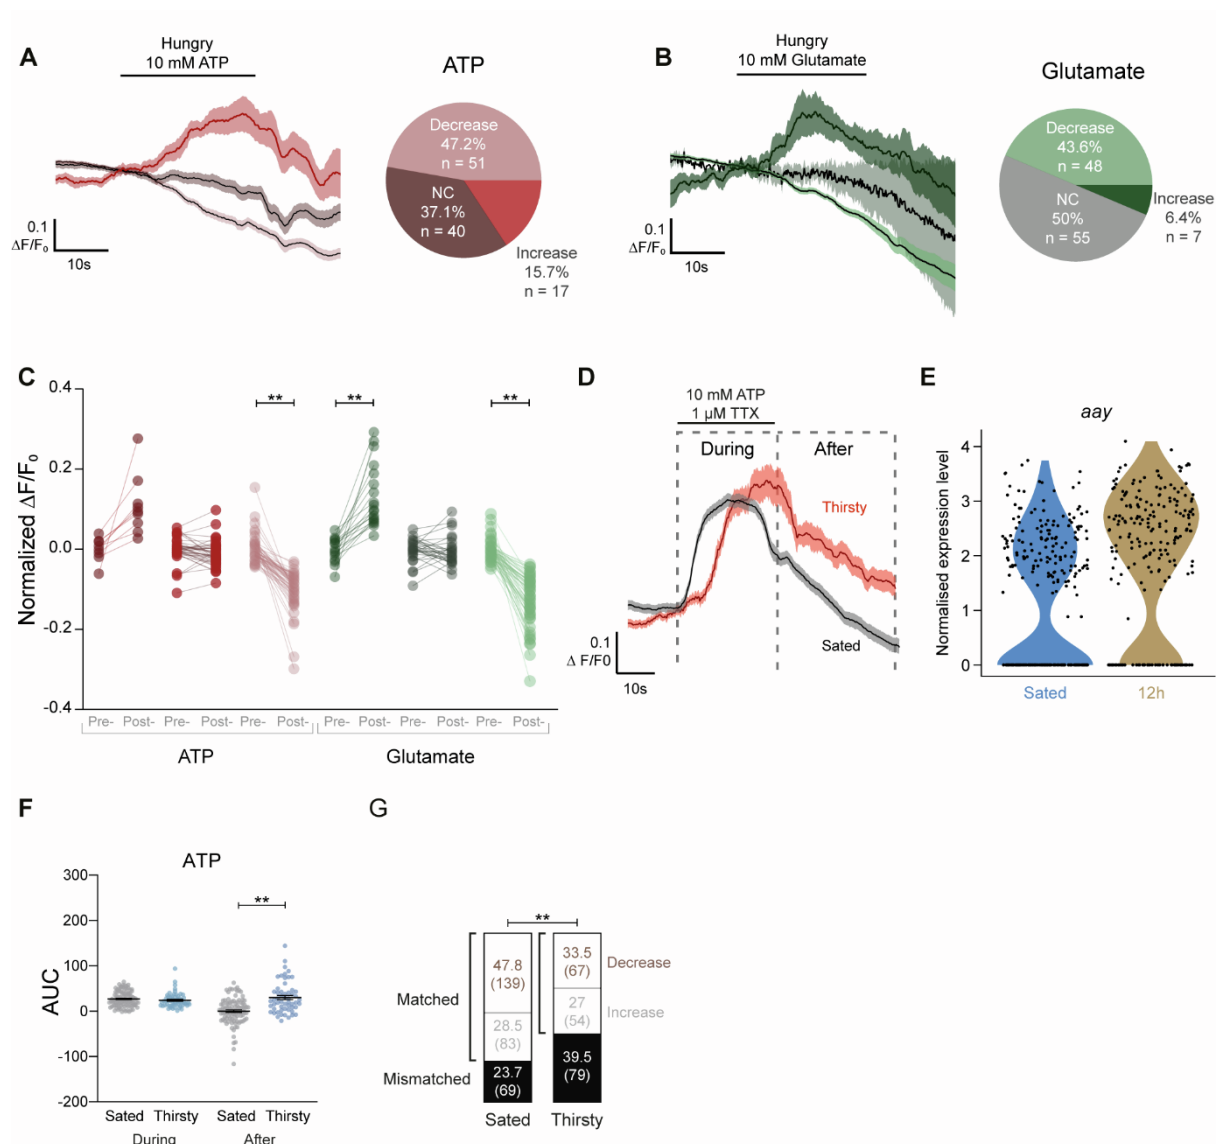

**Figure S7. Astrocytic responses to ATP and glutamate in hungry and thirsty flies, Related to Figure 7**

(A and B) Astrocytes show differential responses to ATP and glutamate in hungry flies. Bold lines are mean responses and shade is SEM. Pie charts show proportion of astrocytes that show positive, no change (NC), and negative responses to ATP and glutamate. (C) Quantification of  $\Delta F/F_0$  before and after neurotransmitter application in hungry flies. \*\*  $p < 0.01$ , Kruskal-Wallis ANOVA with Dunn's multiple comparisons test. (D)  $Ca^{2+}$  imaging traces of positive responsive astrocytes in thirsty and sated animals with ATP application. Line is mean and fill SEM. (E) Violin plot showing the difference of *aay* expression in all astrocytes in sated and 12h dehydrated flies. Each dot represents an individual cell. (F) Area Under the Curve (AUC) of excitatory ATP responses of astrocytes in sated vs. thirsty animals. \*\*  $p < 0.01$ , Kruskal-Wallis ANOVA with Dunn's multiple comparisons test.

(G) Water deprivation desynchronizes matched astrocyte responses for glutamate and ATP.

\*\*  $p < 0.01$ , Fisher's exact test with Bonferroni correction.

**Video S1. Fine astrocytic processes often engulf glutamatergic synaptic boutons or contribute to tripartite synapses, Related to Figures 5I and S5L.** 3D representations of an astrocyte (blue) in the SMP and glutamatergic neurons (green) with boutons containing annotated presynapses (red), which consist of synaptic vesicles (red spheres) and pre-synaptic T-bar densities (black). 00:00 to 00:55, When glial cells engulf axons, multiple processes of different sizes contact a substantial area of a presynaptic bouton's membrane but do not extend into the synapse. 00:56-1:40, Fine astrocyte processes either pass through the synaptic cleft, or terminate within it, to form a tripartite synapse. In both cases the astrocyte processes contact the synaptic cleft alongside the postsynaptic neurons. Many closely spaced boutons of the same presynaptic neuron can be contacted by the same astrocyte, which therefore contributes processes to multiple tripartite synapses. Anatomical features are further highlighted in the video. Cellular meshes were retrieved from FlyWire and animations produced with blender

**Data S1. Top marker genes for each cluster in the entire data set, Related to Figure 1 and Figure S1.**

**Data S2. Top markers for glial clusters, Related to Figure 1 and Figure 2.**
